# Supplementary material for: Visible light-induced phosphine-catalyzed perfluoroalkylation of indoles
Source: Royal Society of Chemistry journal article supplement (doi:10.1039/d2qo01091g), 2022-01-01

*Supporting Information*

# Visible Light-induced Phosphine-Catalyzed Perfluoroalkylation of Indoles

Xiuhui Gao,<sup>a†</sup> Xuling Pan,<sup>a†</sup> Peiyi Wang,<sup>\*a</sup> Zhichao Jin<sup>\*a</sup>

<sup>a</sup>State Key Laboratory Breeding Base of Green Pesticide and Agricultural Bioengineering, Key Laboratory of Green Pesticide and Agricultural Bioengineering, Ministry of Education, Guizhou University, Huaxi District, Guiyang 550025, China.

†These authors contributed equally to this work.

E-mail: zcjin@gzu.edu.cn

[pywang888@126.com](mailto:pywang888@126.com)

## Table of Contents

|                                                               |           |
|---------------------------------------------------------------|-----------|
| <b>I. General information</b> .....                           | <b>1</b>  |
| <b>II. Experimental section: condition optimization</b> ..... | <b>2</b>  |
| <b>III. Preparation of indole acetate</b> .....               | <b>3</b>  |
| <b>IV. General procedure</b> .....                            | <b>5</b>  |
| <b>V. Antibacterial Activity</b> .....                        | <b>6</b>  |
| <b>VI. UV-Vis-Measurements</b> .....                          | <b>8</b>  |
| <b>VIII. NMR spectra</b> .....                                | <b>29</b> |

## I. General information

Commercially available materials purchased from Energy Chemical were used as received. Unless otherwise specified, all reactions were carried out under an atmosphere in 10 mL dry Schlenk tube. NMR spectra were recorded on a Bruker ASCEND 400 (400 MHz) spectrometer ( $^1\text{H}$ : 400 MHz,  $^{13}\text{C}$ : 101 MHz,  $^{19}\text{F}$ : 377 MHz). Chemical shifts ( $\delta$ ) for  $^1\text{H}$  and  $^{13}\text{C}$  NMR spectra are given in ppm relative to TMS. The residual solvent signals were used as references for  $^1\text{H}$  and  $^{13}\text{C}$  NMR spectra and the chemical shifts converted to the TMS scale ( $\text{CDCl}_3$ :  $\delta\text{H} = 7.26$  ppm,  $\delta\text{C} = 77.16$  ppm). The following abbreviations were used to explain the multiplicities: s = singlet, d = doublet, t = triplet, q = quartet, m = multiplet, b = broad, and etc. All first-order splitting patterns were assigned on the base of the appearance of the multiplet. Splitting patterns that could not be easily interpreted are designated as multiplet (m) or broad (br). High resolution mass spectrometer analysis (HRMS) was performed on Thermo Fisher Q Exactive mass spectrometer. Melting point (m.p.): melting points were measured on a Beijing Tech Instrument X-4 digital display micro melting point apparatus and are uncorrected. Analytical thin-layer chromatography (TLC) was carried out on pre-coated silica gel plate (0.2 mm thickness). Visualization was performed using a UV lamp.

## II. Experimental section: condition optimization

**Table 1.** Screening of different phosphines, light sources and solvents <sup>a</sup>.

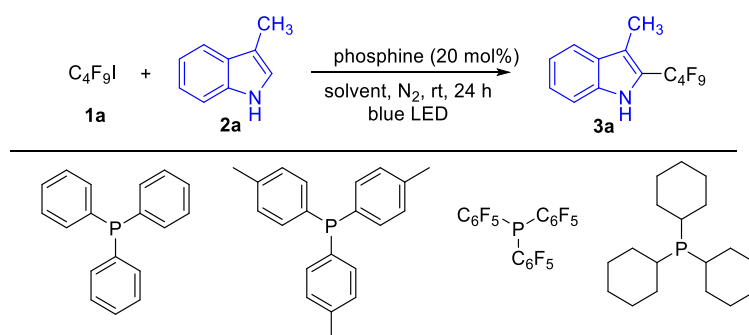

| Entry           | phosphine                          | Solvent                  | Light Source (nm) | Yield (%) <sup>b</sup> |
|-----------------|------------------------------------|--------------------------|-------------------|------------------------|
| 1               | $\text{PPh}_3$                     | $\text{CH}_3\text{CN}$   | 440-445           | 53                     |
| 2               | $\text{P}(p\text{-Tol})_3$         | $\text{CH}_3\text{CN}$   | 440-445           | 34                     |
| 3               | $\text{P}(\text{C}_6\text{F}_5)_3$ | $\text{CH}_3\text{CN}$   | 440-445           | 5<                     |
| 4               | $\text{PCy}_3$                     | $\text{CH}_3\text{CN}$   | 440-445           | 5<                     |
| 5               | -                                  | $\text{CH}_3\text{CN}$   | 440-445           | 5<                     |
| 6               | $\text{PPh}_3$                     | THF                      | 440-445           | 52                     |
| 7               | $\text{PPh}_3$                     | $\text{CH}_3\text{OH}$   | 440-445           | 80                     |
| 8               | $\text{PPh}_3$                     | DMF                      | 440-445           | 66                     |
| 9               | $\text{PPh}_3$                     | $\text{CH}_2\text{Cl}_2$ | 440-445           | 26                     |
| 10              | $\text{PPh}_3$                     | $\text{CH}_3\text{OH}$   | 425-430           | 53                     |
| 12              | $\text{PPh}_3$                     | $\text{CH}_3\text{OH}$   | 460-465           | 27                     |
| 13              | $\text{PPh}_3$                     | $\text{CH}_3\text{OH}$   | 515-520           | 0                      |
| 14              | $\text{PPh}_3$                     | $\text{CH}_3\text{OH}$   | -                 | 0                      |
| 15 <sup>c</sup> | $\text{PPh}_3$                     | $\text{CH}_3\text{OH}$   | 440-445           | 0                      |

<sup>a</sup>Reaction conditions: **1a** (0.11 mmol), **2a** (0.10mmol), Phosphine (20 mol%), Solvent (1.0 mL), blue LED 10 w, rt, N<sub>2</sub>, 24 h. <sup>b</sup>Yields were isolated yields after purification by column chromatography. <sup>c</sup>**1a** (0.11 mmol), **2a** (0.10mmol),  $\text{PPh}_3$  (20 mol%),  $\text{CH}_3\text{OH}$  (1.0 mL), blue LED 10 w, rt.



## References:

- [1] V. A. Bobrin, S.-P. Chen, C. F. Grandes Reyes, B. Sun, C. K. Ng, Y. Kim, D. Purcell, Z. Jia, W. Gu, J. W. Armstrong, J. McAuley and M. J. Monteiro, Water-Borne Nanocoating for Rapid Inactivation of SARS-CoV-2 and Other Viruses, *ACS Nano.*, 2021, **15**, 14915-14927.
- [2] W.-X. Lv, H. Chen, X. Zhang, C. C. Ho, Y. Liu, S. Wu, H. Wang, Z. Jin and Y. R. Chi, Programmable selective acylation of saccharides mediated by carbene and boronic acid, *Chem.*, 2022, **8**, 1518-1534.
- [3] J. F. Bai, L. Zhao, F. Wang, F. Yan, T. Kano, K. Maruoka and Y. Li, Organocatalytic Formal (3 + 2) Cycloaddition toward Chiral Pyrrolo[1,2-*a*]indoles via Dynamic Kinetic Resolution of Allene Intermediates, *Org. Lett.*, 2020, **22**, 5439-5445.
- [4] R. A. Unhale, M. M. Sadhu and V. K. Singh, Chiral Bronsted Acid Catalyzed Enantioselective Synthesis of Spiro-Isoindolinone-Indolines via Formal [3 + 2] Cycloaddition, *Org. Lett.*, 2022, **24**, 3319-3324.

## IV. General procedure

General procedure for the catalytic reactions of substrates **1** and **2** to synthesis the product **3** or **5**:

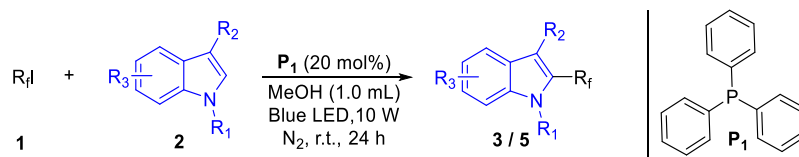

To a 4.0 mL vial equipped with a magnetic stir bar was added 3-methylindoles **1** (0.11 mmol, 38.10 mg) and **P**<sub>1</sub>, put it in a glove box filled with nitrogen to replace the nitrogen, and then perfluoriodobutanes **2** (0.10 mmol, 13.00 mg) were added. then added CH<sub>3</sub>OH (1.00 mL) *via* syringe, Outside the glovebox the reaction vial was transferred into the photoreactor, the irradiation was started and the reaction mixture was allowed to stirred for 24 hours at room temperature. After completion of the reaction, monitored by TLC plate, the mixture was concentrated under reduced pressure. The resulting crude residue was purified *via* column chromatography on silica gel (petroleum ether / ethyl acetate = 100:1) to afford the desired products **3** or **5**.

Procedure for synthesis of **3a** with gram scale

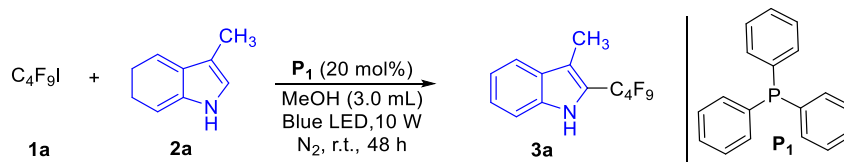

To a 20 mL vial equipped with a magnetic stir bar was added 3-methylindole **1a** (1.1mmol, 0.38 g, 190  $\mu$ L) and **P**<sub>1</sub> (0.20 mmol, 52.00 mg), put it in a glove box filled with nitrogen to replace the nitrogen, and then perfluoriodobutane **2a** (1.0 mmol, 0.13 g) were added. then added CH<sub>3</sub>OH (3.00 mL) *via* syringe, Outside the glovebox the reaction vial was transferred into the photoreactor, the irradiation was started and the reaction mixture was allowed to stirred for 48 hours at room temperature. After completion of the reaction, monitored by TLC plate, the mixture was concentrated under reduced pressure. The resulting crude residue was purified *via* column chromatography on silica gel (petroleum ether / ethyl acetate = 100:1) to afford the desired product **3a** (0.25 g, 70.4% yield).

## V. Antibacterial Activity

**Antibacterial Activity in Vitro:** Antibacterial activities of the title compounds against *Xanthomonas axonopodis* pv. *citri* (Xac) were evaluated by using the turbidimeter test. Thiodiazole-copper (TC) and Bismertiazol (BT) was used as the positive controls. The compound was dissolved in 150.0  $\mu$ L of dimethylformamide and diluted with 0.1% (V/V) Tween-20 to prepare the solutions of two concentrations (100 and 50  $\mu$ g/mL). 1.0 mL of the above solution was added to the non-toxic nutrient broth (NB: 1.5 g of beef extract, 2.5 g of peptone, 0.5 g of yeast powder, 5.0 g of glucose and 500 mL of distilled water, pH = 7.0 ~ 7.2) liquid medium in a 4.0 mL tube. Then, 40.0  $\mu$ L of NB solution containing *Xanthomonas Campestris* pv. *citri* (Xac) was added to 5.0 mL of the NB solution containing the test compound. The inoculated test tube was incubated at (28  $\pm$  1)  $^{\circ}$ C under continuous shaking at 200 rpm for 24 h. The culture growth was monitored by measuring the optical density at 595 nm (OD<sub>595</sub>) and expressed as corrected turbidity. The relative inhibitory rate was calculated as follows:

$$I(\%) = (C_{tur} - T_{tur}) / C_{tur} \times 100\%$$

$C_{tur}$ : the corrected turbidity value of bacterial growth on untreated NB;

$T_{tur}$ : the corrected turbidity value of bacterial growth on treated NB;

$I$ : The relative inhibitory rate.

**Table 2.** In vitro antibacterial activity of the target compounds against Xac<sup>[a]</sup>

| compounds                         | Xac inhibition rate (%) |                  |
|-----------------------------------|-------------------------|------------------|
|                                   | 100 $\mu$ g/mL          | 50 $\mu$ g/mL    |
| 3a                                | 70.38 $\pm$ 6.02        | 69.62 $\pm$ 4.08 |
| 3b                                | 43.82 $\pm$ 8.72        | 44.25 $\pm$ 3.07 |
| 3c                                | 74.89 $\pm$ 1.1         | 72.96 $\pm$ 6.96 |
| 3d                                | 75.00 $\pm$ 5.24        | 74.46 $\pm$ 1.72 |
| 3f                                | 74.09 $\pm$ 1.97        | 69.19 $\pm$ 3.06 |
| 3g                                | 68.06 $\pm$ 0.87        | 56.18 $\pm$ 4.03 |
| 3i                                | 78.6 $\pm$ 2.06         | 75.97 $\pm$ 2.05 |
| 3j                                | 40.32 $\pm$ 3.48        | 31.67 $\pm$ 8.71 |
| 3k                                | 79.52 $\pm$ 1.21        | 73.49 $\pm$ 3.5  |
| 3l                                | 36.99 $\pm$ 9.73        | 28.06 $\pm$ 9.72 |
| 3m                                | 76.99 $\pm$ 2.65        | 65.59 $\pm$ 2.1  |
| 3n                                | 71.08 $\pm$ 1.5         | 64.41 $\pm$ 0.65 |
| 3o                                | 80.16 $\pm$ 3.08        | 68.06 $\pm$ 1.71 |
| 3p                                | 75.65 $\pm$ 1.21        | 69.03 $\pm$ 3.1  |
| 3r                                | 45.54 $\pm$ 8.21        | 38.71 $\pm$ 4.52 |
| 3s                                | 27.53 $\pm$ 4.05        | 35.11 $\pm$ 5.93 |
| 3t                                | 34.62 $\pm$ 5.4         | 17.63 $\pm$ 3.75 |
| 3ca                               | 33.33 $\pm$ 9.46        | 32.47 $\pm$ 1.53 |
| 3ea                               | 76.24 $\pm$ 0.95        | 75.43 $\pm$ 2.2  |
| 3u                                | 40.81 $\pm$ 4.39        | 32.63 $\pm$ 2.01 |
| 3w                                | 59.62 $\pm$ 7.59        | 46.18 $\pm$ 3.91 |
| 3x                                | 81.61 $\pm$ 0.5         | 80.81 $\pm$ 0.92 |
| 5a                                | 79.78 $\pm$ 0.93        | 68.82 $\pm$ 0.9  |
| 5b                                | 44.25 $\pm$ 5.51        | 38.82 $\pm$ 4.15 |
| 5c                                | 25.75 $\pm$ 3.75        | 18.82 $\pm$ 2.25 |
| 5d                                | 23.28 $\pm$ 2.51        | 17.26 $\pm$ 1.68 |
| 5e                                | 15.7 $\pm$ 4.32         | 7.9 $\pm$ 3.87   |
| Thiodiazole-copper <sup>[b]</sup> | 35.91 $\pm$ 2.63        | 24.14 $\pm$ 5.33 |

|                             |             |              |
|-----------------------------|-------------|--------------|
| Bismethiazol <sup>[c]</sup> | 80.38 ± 2.7 | 43.12 ± 0.55 |
| <b>CK</b>                   | 13.71 ± 7.6 | 11.4 ± 1.26  |

---

[a] All data were average data of three replicates. [b], [c] Commercial bactericide, used as the positive control



## VI. UV-Vis-Measurements

We have carried out UV-Vis absorption experiments with both substrates and the triphenylphosphine. The bathochromic shift in the UV-vis absorbance spectra is difficult to be detected, which is in accordance with previous studies on the  $\text{PPh}_3/\text{C}_4\text{F}_9\text{I}$  EDA complex formations. Detailed data is listed below:

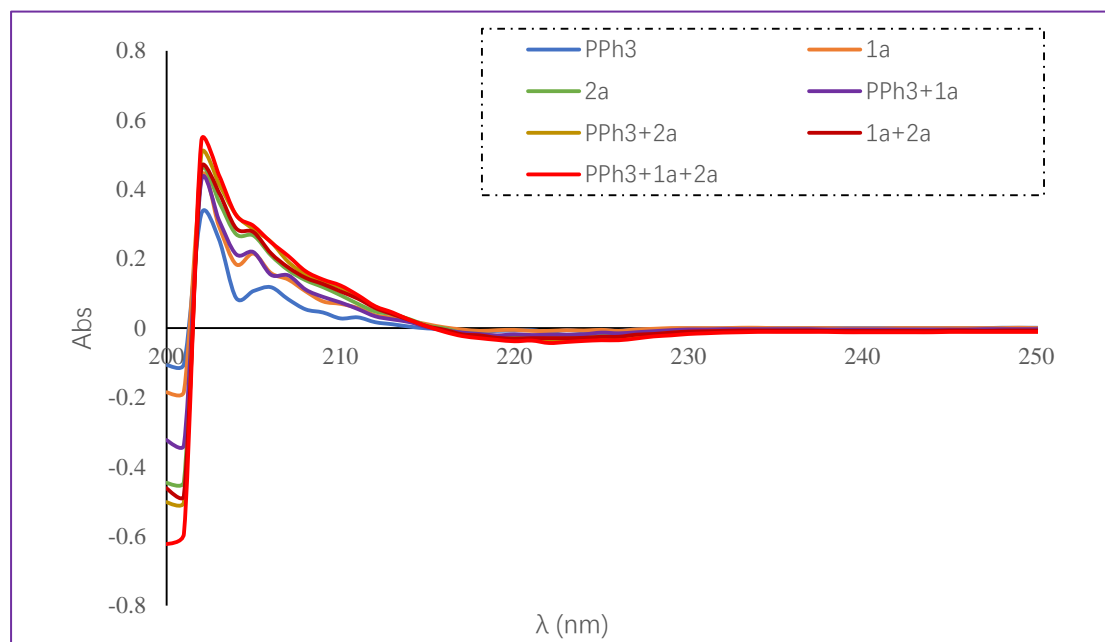

| nm  | Abs            |           |           |                            |                            |              |                                        |
|-----|----------------|-----------|-----------|----------------------------|----------------------------|--------------|----------------------------------------|
|     | $\text{PPh}_3$ | <b>1a</b> | <b>2a</b> | $\text{PPh}_3+1\mathbf{a}$ | $\text{PPh}_3+2\mathbf{a}$ | <b>1a+2a</b> | $\text{PPh}_3+1\mathbf{a}+2\mathbf{a}$ |
| 660 | 0.002          | 0.003     | 0.002     | 0.003                      | 0.001                      | 0.002        | 0.001                                  |
| 659 | 0.002          | 0.003     | 0.002     | 0.002                      | 0.001                      | 0.001        | 0.001                                  |
| 658 | 0.002          | 0.003     | 0.002     | 0.002                      | 0.001                      | 0.001        | 0.001                                  |
| 657 | 0.002          | 0.003     | 0.002     | 0.002                      | 0.001                      | 0.001        | 0.001                                  |
| 656 | 0.002          | 0.003     | 0.002     | 0.002                      | 0.001                      | 0.001        | 0.001                                  |
| 655 | 0.002          | 0.003     | 0.002     | 0.002                      | 0.001                      | 0.001        | 0.001                                  |
| 654 | 0.002          | 0.003     | 0.002     | 0.002                      | 0.001                      | 0.001        | 0.001                                  |
| 653 | 0.002          | 0.003     | 0.002     | 0.002                      | 0.001                      | 0.001        | 0.001                                  |
| 652 | 0.002          | 0.003     | 0.002     | 0.002                      | 0.001                      | 0.001        | 0.001                                  |
| 651 | 0.002          | 0.003     | 0.002     | 0.002                      | 0.001                      | 0.002        | 0.001                                  |
| 650 | 0.002          | 0.003     | 0.002     | 0.002                      | 0.001                      | 0.001        | 0.001                                  |
| 649 | 0.002          | 0.003     | 0.002     | 0.002                      | 0.001                      | 0.001        | 0                                      |
| 648 | 0.002          | 0.003     | 0.002     | 0.002                      | 0.001                      | 0.001        | 0                                      |
| 647 | 0.002          | 0.003     | 0.002     | 0.002                      | 0.001                      | 0.001        | 0                                      |
| 646 | 0.002          | 0.003     | 0.002     | 0.002                      | 0.001                      | 0.001        | 0                                      |
| 645 | 0.002          | 0.003     | 0.002     | 0.002                      | 0.001                      | 0.001        | 0.001                                  |
| 644 | 0.002          | 0.003     | 0.002     | 0.002                      | 0.001                      | 0.001        | 0.001                                  |
| 643 | 0.002          | 0.003     | 0.002     | 0.002                      | 0.001                      | 0.001        | 0.001                                  |
| 642 | 0.002          | 0.003     | 0.002     | 0.002                      | 0.001                      | 0.001        | 0                                      |
| 641 | 0.002          | 0.003     | 0.002     | 0.002                      | 0.001                      | 0.001        | 0.001                                  |
| 640 | 0.002          | 0.003     | 0.002     | 0.002                      | 0.001                      | 0.001        | 0                                      |
| 639 | 0.002          | 0.003     | 0.002     | 0.002                      | 0.001                      | 0.001        | 0.001                                  |





---

|     |       |       |       |       |       |       |   |
|-----|-------|-------|-------|-------|-------|-------|---|
| 538 | 0.002 | 0.003 | 0.001 | 0.002 | 0.001 | 0.001 | 0 |
| 537 | 0.002 | 0.003 | 0.001 | 0.002 | 0.001 | 0.001 | 0 |
| 536 | 0.002 | 0.003 | 0.001 | 0.002 | 0.001 | 0.001 | 0 |
| 535 | 0.002 | 0.003 | 0.001 | 0.002 | 0.001 | 0.001 | 0 |
| 534 | 0.002 | 0.003 | 0.001 | 0.002 | 0.001 | 0.001 | 0 |
| 533 | 0.002 | 0.003 | 0.001 | 0.002 | 0.001 | 0.001 | 0 |
| 532 | 0.002 | 0.003 | 0.001 | 0.002 | 0.001 | 0.001 | 0 |
| 531 | 0.002 | 0.003 | 0.001 | 0.002 | 0     | 0.001 | 0 |
| 530 | 0.002 | 0.003 | 0.001 | 0.002 | 0     | 0.001 | 0 |
| 529 | 0.002 | 0.003 | 0.001 | 0.002 | 0     | 0.001 | 0 |
| 528 | 0.002 | 0.003 | 0.001 | 0.002 | 0     | 0.001 | 0 |
| 527 | 0.002 | 0.003 | 0.001 | 0.002 | 0.001 | 0.001 | 0 |
| 526 | 0.002 | 0.003 | 0.001 | 0.002 | 0     | 0.001 | 0 |
| 525 | 0.002 | 0.003 | 0.001 | 0.002 | 0.001 | 0.001 | 0 |
| 524 | 0.002 | 0.003 | 0.001 | 0.002 | 0.001 | 0.001 | 0 |
| 523 | 0.002 | 0.003 | 0.001 | 0.002 | 0     | 0.001 | 0 |
| 522 | 0.002 | 0.003 | 0.001 | 0.002 | 0.001 | 0.001 | 0 |
| 521 | 0.002 | 0.003 | 0.001 | 0.002 | 0.001 | 0.001 | 0 |
| 520 | 0.002 | 0.003 | 0.001 | 0.002 | 0.001 | 0.001 | 0 |
| 519 | 0.002 | 0.003 | 0.001 | 0.002 | 0     | 0.001 | 0 |
| 518 | 0.002 | 0.003 | 0.001 | 0.002 | 0.001 | 0.001 | 0 |
| 517 | 0.002 | 0.003 | 0.001 | 0.002 | 0.001 | 0.001 | 0 |
| 516 | 0.002 | 0.003 | 0.001 | 0.002 | 0     | 0.001 | 0 |
| 515 | 0.002 | 0.003 | 0.001 | 0.002 | 0.001 | 0.001 | 0 |
| 514 | 0.002 | 0.003 | 0.001 | 0.002 | 0.001 | 0.001 | 0 |
| 513 | 0.002 | 0.003 | 0.001 | 0.002 | 0.001 | 0.001 | 0 |
| 512 | 0.002 | 0.003 | 0.001 | 0.002 | 0.001 | 0.001 | 0 |
| 511 | 0.002 | 0.003 | 0.001 | 0.002 | 0.001 | 0.001 | 0 |
| 510 | 0.002 | 0.003 | 0.001 | 0.002 | 0     | 0.001 | 0 |
| 509 | 0.003 | 0.003 | 0.001 | 0.002 | 0.001 | 0.001 | 0 |
| 508 | 0.003 | 0.003 | 0.002 | 0.002 | 0.001 | 0.001 | 0 |
| 507 | 0.002 | 0.003 | 0.001 | 0.002 | 0.001 | 0.001 | 0 |
| 506 | 0.003 | 0.003 | 0.002 | 0.003 | 0.001 | 0.001 | 0 |
| 505 | 0.003 | 0.003 | 0.001 | 0.002 | 0.001 | 0.001 | 0 |
| 504 | 0.002 | 0.003 | 0.001 | 0.002 | 0     | 0.001 | 0 |
| 503 | 0.002 | 0.003 | 0.001 | 0.002 | 0.001 | 0.001 | 0 |
| 502 | 0.003 | 0.003 | 0.001 | 0.002 | 0.001 | 0.001 | 0 |
| 501 | 0.003 | 0.003 | 0.001 | 0.002 | 0     | 0.001 | 0 |
| 500 | 0.003 | 0.003 | 0.001 | 0.002 | 0     | 0.001 | 0 |
| 499 | 0.003 | 0.003 | 0.001 | 0.002 | 0.001 | 0.001 | 0 |
| 498 | 0.003 | 0.003 | 0.002 | 0.002 | 0.001 | 0.001 | 0 |
| 497 | 0.003 | 0.003 | 0.001 | 0.002 | 0.001 | 0.001 | 0 |
| 496 | 0.002 | 0.003 | 0.001 | 0.002 | 0     | 0.001 | 0 |
| 495 | 0.002 | 0.003 | 0.001 | 0.002 | 0     | 0.001 | 0 |
| 494 | 0.002 | 0.003 | 0.001 | 0.002 | 0.001 | 0.001 | 0 |
| 493 | 0.002 | 0.003 | 0.001 | 0.002 | 0     | 0.001 | 0 |
| 492 | 0.002 | 0.003 | 0.001 | 0.002 | 0     | 0.001 | 0 |
| 491 | 0.003 | 0.003 | 0.001 | 0.002 | 0     | 0.001 | 0 |
| 490 | 0.003 | 0.003 | 0.001 | 0.002 | 0     | 0.001 | 0 |
| 489 | 0.002 | 0.003 | 0.001 | 0.002 | 0     | 0.001 | 0 |

---

---

|     |       |       |       |       |       |       |        |
|-----|-------|-------|-------|-------|-------|-------|--------|
| 488 | 0.002 | 0.003 | 0.001 | 0.002 | 0     | 0.001 | 0      |
| 487 | 0.002 | 0.003 | 0.001 | 0.002 | 0     | 0.001 | 0      |
| 486 | 0.002 | 0.003 | 0.001 | 0.002 | 0     | 0.001 | 0      |
| 485 | 0.003 | 0.003 | 0.001 | 0.002 | 0     | 0.001 | 0      |
| 484 | 0.002 | 0.003 | 0.002 | 0.002 | 0.001 | 0.001 | 0      |
| 483 | 0.002 | 0.003 | 0.001 | 0.002 | 0.001 | 0.001 | 0      |
| 482 | 0.003 | 0.003 | 0.001 | 0.002 | 0.001 | 0.001 | 0      |
| 481 | 0.002 | 0.003 | 0.001 | 0.002 | 0     | 0.001 | 0      |
| 480 | 0.002 | 0.003 | 0.001 | 0.002 | 0     | 0.001 | 0      |
| 479 | 0.003 | 0.003 | 0.001 | 0.002 | 0     | 0.001 | 0      |
| 478 | 0.002 | 0.003 | 0.001 | 0.002 | 0     | 0.001 | 0      |
| 477 | 0.003 | 0.004 | 0.001 | 0.002 | 0.001 | 0.001 | 0      |
| 476 | 0.002 | 0.004 | 0.002 | 0.002 | 0.001 | 0.001 | 0      |
| 475 | 0.002 | 0.004 | 0.002 | 0.002 | 0.001 | 0.001 | 0      |
| 474 | 0.002 | 0.004 | 0.002 | 0.002 | 0.001 | 0.001 | 0      |
| 473 | 0.002 | 0.004 | 0.002 | 0.002 | 0.001 | 0.001 | 0      |
| 472 | 0.002 | 0.004 | 0.002 | 0.002 | 0.001 | 0.001 | 0      |
| 471 | 0.002 | 0.003 | 0.001 | 0.002 | 0     | 0.001 | 0      |
| 470 | 0.002 | 0.003 | 0.002 | 0.002 | 0.001 | 0.001 | 0      |
| 469 | 0.002 | 0.003 | 0.001 | 0.002 | 0     | 0.001 | 0      |
| 468 | 0.003 | 0.003 | 0.002 | 0.002 | 0.001 | 0.001 | 0      |
| 467 | 0.002 | 0.003 | 0.001 | 0.002 | 0     | 0.001 | 0      |
| 466 | 0.002 | 0.003 | 0.001 | 0.002 | 0     | 0.001 | 0      |
| 465 | 0.003 | 0.003 | 0.001 | 0.002 | 0     | 0.001 | 0      |
| 464 | 0.002 | 0.003 | 0.001 | 0.002 | 0     | 0     | -0.001 |
| 463 | 0.002 | 0.003 | 0.001 | 0.002 | 0     | 0     | -0.001 |
| 462 | 0.002 | 0.003 | 0.001 | 0.002 | 0     | 0     | -0.001 |
| 461 | 0.002 | 0.003 | 0.001 | 0.002 | 0     | 0     | -0.001 |
| 460 | 0.002 | 0.003 | 0.001 | 0.002 | 0     | 0     | -0.001 |
| 459 | 0.002 | 0.003 | 0.001 | 0.002 | 0     | 0     | -0.001 |
| 458 | 0.002 | 0.003 | 0.001 | 0.002 | 0     | 0     | -0.001 |
| 457 | 0.002 | 0.003 | 0.001 | 0.002 | 0     | 0     | -0.001 |
| 456 | 0.002 | 0.003 | 0.001 | 0.002 | 0     | 0     | -0.001 |
| 455 | 0.002 | 0.003 | 0.001 | 0.002 | 0     | 0.001 | -0.001 |
| 454 | 0.002 | 0.003 | 0.001 | 0.002 | 0     | 0     | -0.001 |
| 453 | 0.002 | 0.003 | 0.001 | 0.002 | 0     | 0.001 | 0      |
| 452 | 0.003 | 0.003 | 0.001 | 0.002 | 0     | 0.001 | 0      |
| 451 | 0.003 | 0.003 | 0.001 | 0.002 | 0     | 0.001 | 0      |
| 450 | 0.002 | 0.003 | 0.001 | 0.002 | 0     | 0.001 | 0      |
| 449 | 0.002 | 0.003 | 0.001 | 0.002 | 0     | 0.001 | 0      |
| 448 | 0.002 | 0.003 | 0.001 | 0.002 | 0     | 0.001 | 0      |
| 447 | 0.002 | 0.003 | 0.001 | 0.002 | 0     | 0.001 | 0      |
| 446 | 0.002 | 0.004 | 0.002 | 0.002 | 0     | 0.001 | 0      |
| 445 | 0.002 | 0.003 | 0.001 | 0.002 | 0     | 0.001 | 0      |
| 444 | 0.002 | 0.004 | 0.002 | 0.002 | 0     | 0.001 | 0      |
| 443 | 0.002 | 0.004 | 0.002 | 0.002 | 0     | 0.001 | 0      |
| 442 | 0.002 | 0.004 | 0.002 | 0.002 | 0     | 0.001 | 0      |
| 441 | 0.002 | 0.004 | 0.002 | 0.002 | 0     | 0.001 | 0      |
| 440 | 0.002 | 0.004 | 0.002 | 0.002 | 0.001 | 0.001 | 0      |
| 439 | 0.003 | 0.004 | 0.002 | 0.002 | 0.001 | 0.001 | 0      |

---

---

|     |       |       |        |        |        |        |        |
|-----|-------|-------|--------|--------|--------|--------|--------|
| 438 | 0.001 | 0.002 | -0.001 | 0      | -0.002 | -0.002 | -0.003 |
| 437 | 0.001 | 0.002 | -0.001 | 0      | -0.002 | -0.002 | -0.003 |
| 436 | 0.001 | 0.002 | -0.001 | 0      | -0.002 | -0.002 | -0.003 |
| 435 | 0.001 | 0.002 | -0.001 | 0      | -0.002 | -0.002 | -0.003 |
| 434 | 0.001 | 0.002 | -0.001 | -0.001 | -0.003 | -0.002 | -0.003 |
| 433 | 0.001 | 0.002 | -0.002 | 0      | -0.003 | -0.002 | -0.004 |
| 432 | 0.001 | 0.002 | -0.001 | 0      | -0.003 | -0.002 | -0.004 |
| 431 | 0.001 | 0.002 | -0.002 | 0      | -0.003 | -0.002 | -0.004 |
| 430 | 0.001 | 0.002 | -0.002 | 0      | -0.003 | -0.002 | -0.004 |
| 429 | 0.001 | 0.001 | -0.002 | 0      | -0.003 | -0.003 | -0.004 |
| 428 | 0.001 | 0.001 | -0.002 | 0      | -0.003 | -0.003 | -0.004 |
| 427 | 0.001 | 0.002 | -0.002 | 0      | -0.003 | -0.002 | -0.004 |
| 426 | 0.001 | 0.002 | -0.002 | 0      | -0.003 | -0.003 | -0.004 |
| 425 | 0.001 | 0.002 | -0.002 | 0      | -0.003 | -0.003 | -0.004 |
| 424 | 0.001 | 0.002 | -0.002 | 0      | -0.003 | -0.003 | -0.004 |
| 423 | 0.001 | 0.002 | -0.002 | 0      | -0.003 | -0.003 | -0.004 |
| 422 | 0.001 | 0.002 | -0.002 | 0      | -0.003 | -0.003 | -0.004 |
| 421 | 0.001 | 0.001 | -0.002 | -0.001 | -0.003 | -0.003 | -0.004 |
| 420 | 0.001 | 0.001 | -0.002 | 0      | -0.003 | -0.003 | -0.004 |
| 419 | 0.001 | 0.002 | -0.002 | 0      | -0.003 | -0.003 | -0.004 |
| 418 | 0.001 | 0.001 | -0.002 | 0      | -0.004 | -0.003 | -0.005 |
| 417 | 0.001 | 0.001 | -0.002 | -0.001 | -0.004 | -0.003 | -0.005 |
| 416 | 0.001 | 0.001 | -0.003 | -0.001 | -0.004 | -0.003 | -0.005 |
| 415 | 0.001 | 0.001 | -0.003 | -0.002 | -0.004 | -0.003 | -0.005 |
| 414 | 0.001 | 0.001 | -0.003 | -0.002 | -0.004 | -0.004 | -0.005 |
| 413 | 0.001 | 0.001 | -0.003 | -0.001 | -0.004 | -0.004 | -0.006 |
| 412 | 0.001 | 0.001 | -0.003 | -0.001 | -0.005 | -0.004 | -0.006 |
| 411 | 0     | 0.001 | -0.003 | -0.001 | -0.005 | -0.004 | -0.006 |
| 410 | 0     | 0.001 | -0.004 | -0.001 | -0.005 | -0.004 | -0.006 |
| 409 | 0     | 0.001 | -0.004 | -0.001 | -0.005 | -0.004 | -0.006 |
| 408 | 0     | 0.001 | -0.004 | -0.002 | -0.005 | -0.005 | -0.006 |
| 407 | 0     | 0.001 | -0.004 | -0.002 | -0.005 | -0.005 | -0.006 |
| 406 | 0     | 0.001 | -0.004 | -0.002 | -0.005 | -0.005 | -0.006 |
| 405 | 0     | 0.001 | -0.004 | -0.002 | -0.005 | -0.005 | -0.007 |
| 404 | 0.003 | 0.004 | 0.002  | 0.003  | 0.001  | 0.002  | 0.001  |
| 403 | 0.003 | 0.005 | 0.002  | 0.003  | 0.002  | 0.002  | 0.001  |
| 402 | 0.003 | 0.004 | 0.002  | 0.001  | 0.002  | 0.002  | 0.001  |
| 401 | 0.003 | 0.005 | 0.003  | 0.004  | 0.002  | 0.003  | 0.002  |
| 400 | 0.003 | 0.005 | 0.003  | 0.004  | 0.002  | 0.002  | 0.001  |
| 399 | 0.003 | 0.005 | 0.003  | 0.003  | 0.002  | 0.002  | 0.001  |
| 398 | 0.003 | 0.005 | 0.003  | 0.003  | 0.002  | 0.002  | 0.001  |
| 397 | 0.003 | 0.005 | 0.003  | 0.003  | 0.002  | 0.002  | 0.001  |
| 396 | 0.003 | 0.005 | 0.003  | 0.003  | 0.002  | 0.003  | 0.001  |
| 395 | 0.003 | 0.005 | 0.003  | 0.004  | 0.002  | 0.003  | 0.002  |
| 394 | 0.004 | 0.005 | 0.003  | 0.004  | 0.002  | 0.003  | 0.002  |
| 393 | 0.003 | 0.005 | 0.003  | 0.004  | 0.002  | 0.003  | 0.002  |
| 392 | 0.003 | 0.006 | 0.003  | 0.004  | 0.002  | 0.003  | 0.002  |
| 391 | 0.003 | 0.005 | 0.003  | 0.004  | 0.002  | 0.003  | 0.002  |
| 390 | 0.003 | 0.005 | 0.003  | 0.004  | 0.003  | 0.003  | 0.002  |
| 389 | 0.003 | 0.005 | 0.003  | 0.004  | 0.003  | 0.003  | 0.002  |

---

|     |       |       |       |       |       |       |        |
|-----|-------|-------|-------|-------|-------|-------|--------|
| 388 | 0.003 | 0.005 | 0.003 | 0.004 | 0.002 | 0.003 | 0.002  |
| 387 | 0.004 | 0.006 | 0.004 | 0.004 | 0.003 | 0.003 | 0.002  |
| 386 | 0.004 | 0.006 | 0.004 | 0.004 | 0.003 | 0.003 | 0.003  |
| 385 | 0.004 | 0.006 | 0.004 | 0.004 | 0.003 | 0.003 | 0.003  |
| 384 | 0.004 | 0.006 | 0.004 | 0.004 | 0.003 | 0.004 | 0.003  |
| 383 | 0.004 | 0.006 | 0.004 | 0.004 | 0.003 | 0.004 | 0.003  |
| 382 | 0.004 | 0.006 | 0.004 | 0.004 | 0.003 | 0.004 | 0.003  |
| 381 | 0.004 | 0.006 | 0.004 | 0.005 | 0.003 | 0.004 | 0.003  |
| 380 | 0.003 | 0.006 | 0.004 | 0.004 | 0.003 | 0.003 | 0.003  |
| 379 | 0.004 | 0.006 | 0.004 | 0.005 | 0.004 | 0.004 | 0.003  |
| 378 | 0.004 | 0.006 | 0.004 | 0.005 | 0.004 | 0.004 | 0.004  |
| 377 | 0.004 | 0.006 | 0.005 | 0.005 | 0.004 | 0.004 | 0.004  |
| 376 | 0.004 | 0.006 | 0.004 | 0.004 | 0.004 | 0.004 | 0.004  |
| 375 | 0.003 | 0.006 | 0.005 | 0.005 | 0.004 | 0.004 | 0.004  |
| 374 | 0.004 | 0.007 | 0.005 | 0.005 | 0.004 | 0.005 | 0.004  |
| 373 | 0.004 | 0.007 | 0.004 | 0.006 | 0.005 | 0.005 | 0.004  |
| 372 | 0.004 | 0.007 | 0.005 | 0.006 | 0.005 | 0.005 | 0.005  |
| 371 | 0.004 | 0.007 | 0.005 | 0.006 | 0.005 | 0.005 | 0.005  |
| 370 | 0.004 | 0.007 | 0.005 | 0.006 | 0.005 | 0.005 | 0.005  |
| 369 | 0.004 | 0.008 | 0.005 | 0.006 | 0.005 | 0.005 | 0.005  |
| 368 | 0.004 | 0.007 | 0.005 | 0.006 | 0.005 | 0.005 | 0.005  |
| 367 | 0.003 | 0.007 | 0.005 | 0.006 | 0.005 | 0.006 | 0.005  |
| 366 | 0.004 | 0.008 | 0.007 | 0.007 | 0.006 | 0.006 | 0.006  |
| 365 | 0.004 | 0.008 | 0.007 | 0.007 | 0.006 | 0.006 | 0.006  |
| 364 | 0.003 | 0.008 | 0.006 | 0.006 | 0.005 | 0.005 | 0.006  |
| 363 | 0.004 | 0.009 | 0.006 | 0.006 | 0.006 | 0.005 | 0.006  |
| 362 | 0.004 | 0.009 | 0.006 | 0.006 | 0.005 | 0.006 | 0.006  |
| 361 | 0.002 | 0.005 | 0.002 | 0.003 | 0.001 | 0.002 | 0.001  |
| 360 | 0.002 | 0.005 | 0.002 | 0.003 | 0.001 | 0.002 | 0.001  |
| 359 | 0.002 | 0.004 | 0.001 | 0.002 | 0.001 | 0.001 | 0      |
| 358 | 0.002 | 0.005 | 0.002 | 0.003 | 0.001 | 0.002 | 0      |
| 357 | 0.002 | 0.004 | 0.001 | 0.003 | 0.001 | 0.001 | 0      |
| 356 | 0.002 | 0.005 | 0.001 | 0.003 | 0.001 | 0.001 | 0      |
| 355 | 0.002 | 0.005 | 0.002 | 0.003 | 0.001 | 0.001 | 0      |
| 354 | 0.002 | 0.005 | 0.002 | 0.003 | 0.001 | 0.002 | 0      |
| 353 | 0.003 | 0.005 | 0.002 | 0.003 | 0.001 | 0.001 | 0      |
| 352 | 0.002 | 0.005 | 0.001 | 0.003 | 0.001 | 0.001 | 0      |
| 351 | 0.002 | 0.005 | 0.002 | 0.003 | 0.001 | 0.001 | 0      |
| 350 | 0.002 | 0.005 | 0.001 | 0.003 | 0     | 0.001 | -0.001 |
| 349 | 0.002 | 0.004 | 0.001 | 0.002 | 0     | 0.001 | -0.001 |
| 348 | 0.002 | 0.004 | 0.001 | 0.003 | 0     | 0.001 | 0      |
| 347 | 0.002 | 0.004 | 0.001 | 0.002 | 0     | 0.001 | -0.001 |
| 346 | 0.002 | 0.004 | 0.001 | 0.003 | 0     | 0     | -0.001 |
| 345 | 0.002 | 0.004 | 0.001 | 0.002 | 0     | 0.001 | -0.001 |
| 344 | 0.002 | 0.004 | 0.001 | 0.002 | 0     | 0.001 | -0.001 |
| 343 | 0.002 | 0.004 | 0.001 | 0.002 | 0     | 0     | -0.001 |
| 342 | 0.002 | 0.004 | 0.001 | 0.002 | 0     | 0     | -0.001 |
| 341 | 0.002 | 0.004 | 0.001 | 0.002 | 0     | 0.001 | -0.001 |
| 340 | 0.003 | 0.004 | 0.001 | 0.002 | 0     | 0.001 | -0.001 |
| 339 | 0.002 | 0.004 | 0     | 0.002 | 0     | 0.001 | -0.001 |

|     |       |        |        |        |        |        |        |
|-----|-------|--------|--------|--------|--------|--------|--------|
| 338 | 0.002 | 0.004  | 0.001  | 0.002  | 0      | 0.001  | -0.001 |
| 337 | 0.002 | 0.004  | 0.001  | 0.002  | 0      | 0.001  | -0.001 |
| 336 | 0.003 | 0.004  | 0.001  | 0.002  | 0      | 0.001  | -0.001 |
| 335 | 0.003 | 0.004  | 0.001  | 0.002  | 0      | 0.001  | -0.001 |
| 334 | 0.003 | 0.004  | 0.001  | 0.002  | 0      | 0.001  | -0.001 |
| 333 | 0.003 | 0.004  | 0.001  | 0.002  | 0      | 0      | -0.001 |
| 332 | 0.003 | 0.004  | 0.001  | 0.002  | 0      | 0      | -0.001 |
| 331 | 0.003 | 0.004  | 0.001  | 0.002  | 0      | 0.001  | -0.001 |
| 330 | 0.003 | 0.004  | 0.001  | 0.002  | 0      | 0      | -0.001 |
| 329 | 0.003 | 0.004  | 0      | 0.002  | 0      | 0      | -0.002 |
| 328 | 0.002 | 0.004  | 0.001  | 0.002  | -0.001 | 0      | -0.001 |
| 327 | 0.002 | 0.004  | 0      | 0.002  | -0.001 | 0      | -0.002 |
| 326 | 0.002 | 0.004  | 0      | 0.002  | -0.001 | 0      | -0.002 |
| 325 | 0.002 | 0.004  | 0      | 0.002  | -0.001 | 0      | -0.002 |
| 324 | 0.002 | 0.004  | 0      | 0.001  | -0.001 | 0      | -0.002 |
| 323 | 0.002 | 0.004  | 0      | 0.001  | -0.001 | -0.001 | -0.002 |
| 322 | 0.002 | 0.004  | 0      | 0.001  | -0.001 | 0      | -0.002 |
| 321 | 0.002 | 0.004  | 0      | 0.001  | -0.001 | -0.001 | -0.002 |
| 320 | 0.002 | 0.004  | 0      | 0.001  | -0.002 | -0.001 | -0.002 |
| 319 | 0.002 | 0.003  | 0      | 0.001  | -0.002 | -0.001 | -0.003 |
| 318 | 0.002 | 0.004  | 0      | 0.002  | -0.002 | -0.001 | -0.002 |
| 317 | 0.002 | 0.004  | 0      | 0.001  | -0.002 | -0.001 | -0.002 |
| 316 | 0.002 | 0.004  | 0      | 0.002  | -0.002 | -0.001 | -0.002 |
| 315 | 0.002 | 0.004  | 0      | 0.001  | -0.002 | -0.001 | -0.003 |
| 314 | 0.002 | 0.003  | 0      | 0.002  | -0.002 | -0.001 | -0.003 |
| 313 | 0.002 | 0.004  | 0      | 0.001  | -0.002 | -0.001 | -0.003 |
| 312 | 0.002 | 0.003  | 0      | 0.001  | -0.002 | -0.001 | -0.003 |
| 311 | 0.002 | 0.003  | 0      | 0.001  | -0.002 | -0.001 | -0.003 |
| 310 | 0.002 | 0.003  | 0      | 0.001  | -0.002 | -0.001 | -0.003 |
| 309 | 0.002 | 0.003  | -0.001 | 0.001  | -0.002 | -0.001 | -0.003 |
| 308 | 0.002 | 0.003  | -0.001 | 0.001  | -0.002 | -0.001 | -0.003 |
| 307 | 0.002 | 0.003  | -0.001 | 0.001  | -0.002 | -0.001 | -0.003 |
| 306 | 0.002 | 0.003  | -0.001 | 0.001  | -0.002 | -0.001 | -0.003 |
| 305 | 0.002 | 0.003  | 0      | 0.001  | -0.003 | -0.001 | -0.003 |
| 304 | 0.002 | 0.003  | -0.001 | 0.001  | -0.003 | -0.002 | -0.004 |
| 303 | 0.002 | 0.003  | -0.001 | 0.001  | -0.003 | -0.002 | -0.004 |
| 302 | 0.002 | 0.003  | -0.001 | 0.001  | -0.003 | -0.002 | -0.004 |
| 301 | 0.002 | 0.003  | -0.001 | 0.001  | -0.003 | -0.002 | -0.004 |
| 300 | 0.002 | 0.003  | -0.001 | 0.001  | -0.003 | -0.002 | -0.004 |
| 299 | 0.002 | 0.003  | -0.001 | 0.001  | -0.003 | -0.002 | -0.004 |
| 298 | 0.002 | 0.003  | -0.001 | 0.001  | -0.003 | -0.002 | -0.004 |
| 297 | 0.002 | 0.003  | -0.001 | 0.001  | -0.003 | -0.002 | -0.004 |
| 296 | 0     | 0      | -0.007 | -0.004 | -0.01  | -0.008 | -0.011 |
| 295 | 0     | -0.001 | -0.007 | -0.004 | -0.01  | -0.008 | -0.012 |
| 294 | 0     | -0.001 | -0.007 | -0.004 | -0.01  | -0.009 | -0.012 |
| 293 | 0     | -0.001 | -0.007 | -0.004 | -0.01  | -0.009 | -0.012 |
| 292 | 0     | -0.001 | -0.008 | -0.004 | -0.011 | -0.009 | -0.013 |
| 291 | 0     | -0.001 | -0.008 | -0.005 | -0.011 | -0.009 | -0.013 |
| 290 | 0     | -0.001 | -0.008 | -0.005 | -0.012 | -0.01  | -0.014 |
| 289 | 0     | -0.001 | -0.008 | -0.005 | -0.012 | -0.01  | -0.014 |



---

|     |        |        |        |        |        |        |        |
|-----|--------|--------|--------|--------|--------|--------|--------|
| 288 | -0.001 | -0.001 | -0.009 | -0.005 | -0.012 | -0.011 | -0.014 |
| 287 | -0.001 | -0.002 | -0.009 | -0.005 | -0.012 | -0.011 | -0.015 |
| 286 | 0      | -0.002 | -0.009 | -0.005 | -0.013 | -0.011 | -0.015 |
| 285 | -0.001 | -0.002 | -0.01  | -0.006 | -0.013 | -0.011 | -0.015 |
| 284 | -0.001 | -0.002 | -0.01  | -0.006 | -0.013 | -0.011 | -0.016 |
| 283 | -0.001 | -0.002 | -0.01  | -0.006 | -0.014 | -0.012 | -0.016 |
| 282 | -0.001 | -0.002 | -0.01  | -0.006 | -0.014 | -0.012 | -0.017 |
| 281 | -0.001 | -0.002 | -0.011 | -0.006 | -0.014 | -0.012 | -0.017 |
| 280 | -0.001 | -0.002 | -0.011 | -0.007 | -0.014 | -0.012 | -0.017 |
| 279 | -0.001 | -0.002 | -0.011 | -0.007 | -0.014 | -0.013 | -0.017 |
| 278 | -0.001 | -0.002 | -0.011 | -0.006 | -0.014 | -0.012 | -0.017 |
| 277 | -0.001 | -0.002 | -0.011 | -0.007 | -0.015 | -0.013 | -0.017 |
| 276 | -0.001 | -0.002 | -0.011 | -0.007 | -0.015 | -0.013 | -0.018 |
| 275 | -0.001 | -0.002 | -0.011 | -0.007 | -0.015 | -0.013 | -0.017 |
| 274 | -0.001 | -0.002 | -0.011 | -0.007 | -0.015 | -0.013 | -0.018 |
| 273 | -0.001 | -0.002 | -0.011 | -0.007 | -0.015 | -0.013 | -0.018 |
| 272 | -0.001 | -0.002 | -0.011 | -0.007 | -0.015 | -0.013 | -0.018 |
| 271 | -0.001 | -0.002 | -0.011 | -0.007 | -0.015 | -0.013 | -0.018 |
| 270 | -0.001 | -0.002 | -0.011 | -0.006 | -0.015 | -0.013 | -0.018 |
| 269 | -0.001 | -0.002 | -0.011 | -0.006 | -0.015 | -0.013 | -0.017 |
| 268 | -0.001 | -0.002 | -0.011 | -0.006 | -0.015 | -0.013 | -0.017 |
| 267 | -0.001 | -0.002 | -0.011 | -0.006 | -0.015 | -0.012 | -0.017 |
| 266 | -0.001 | -0.002 | -0.011 | -0.007 | -0.015 | -0.012 | -0.017 |
| 265 | -0.001 | -0.002 | -0.01  | -0.007 | -0.015 | -0.012 | -0.017 |
| 264 | -0.001 | -0.002 | -0.01  | -0.007 | -0.015 | -0.012 | -0.017 |
| 263 | -0.001 | -0.002 | -0.01  | -0.007 | -0.015 | -0.012 | -0.017 |
| 262 | -0.001 | -0.002 | -0.01  | -0.006 | -0.014 | -0.012 | -0.017 |
| 261 | 0.001  | 0.001  | -0.006 | -0.003 | -0.009 | -0.007 | -0.012 |
| 260 | 0.001  | 0      | -0.006 | -0.003 | -0.009 | -0.007 | -0.011 |
| 259 | 0.001  | 0.001  | -0.006 | -0.003 | -0.009 | -0.007 | -0.012 |
| 258 | 0.001  | 0.001  | -0.006 | -0.003 | -0.009 | -0.007 | -0.011 |
| 257 | 0.001  | 0.001  | -0.006 | -0.003 | -0.009 | -0.007 | -0.012 |
| 256 | 0.001  | 0.001  | -0.006 | -0.003 | -0.009 | -0.007 | -0.011 |
| 255 | 0.001  | 0.001  | -0.006 | -0.003 | -0.009 | -0.007 | -0.011 |
| 254 | 0.001  | 0.001  | -0.005 | -0.003 | -0.009 | -0.007 | -0.011 |
| 253 | 0.001  | 0.001  | -0.005 | -0.003 | -0.009 | -0.007 | -0.011 |
| 252 | 0.001  | 0.001  | -0.006 | -0.003 | -0.009 | -0.007 | -0.011 |
| 251 | 0      | 0      | -0.006 | -0.003 | -0.009 | -0.007 | -0.011 |
| 250 | 0.001  | 0      | -0.006 | -0.003 | -0.009 | -0.007 | -0.011 |
| 249 | 0.001  | 0.001  | -0.006 | -0.003 | -0.009 | -0.007 | -0.011 |
| 248 | 0.001  | 0      | -0.006 | -0.003 | -0.009 | -0.007 | -0.011 |
| 247 | 0      | 0      | -0.006 | -0.003 | -0.009 | -0.008 | -0.011 |
| 246 | 0      | 0      | -0.006 | -0.004 | -0.009 | -0.007 | -0.011 |
| 245 | 0      | 0      | -0.006 | -0.004 | -0.009 | -0.007 | -0.011 |
| 244 | 0      | 0      | -0.006 | -0.004 | -0.009 | -0.008 | -0.012 |
| 243 | 0      | 0      | -0.006 | -0.004 | -0.009 | -0.008 | -0.012 |
| 242 | 0      | 0      | -0.006 | -0.004 | -0.009 | -0.008 | -0.012 |
| 241 | 0      | -0.001 | -0.006 | -0.004 | -0.009 | -0.008 | -0.012 |
| 240 | 0      | -0.001 | -0.006 | -0.004 | -0.009 | -0.008 | -0.012 |
| 239 | 0      | -0.001 | -0.006 | -0.004 | -0.009 | -0.008 | -0.012 |

---

---

|     |        |        |        |        |        |        |        |
|-----|--------|--------|--------|--------|--------|--------|--------|
| 238 | 0      | 0      | -0.006 | -0.004 | -0.009 | -0.008 | -0.011 |
| 237 | 0      | 0      | -0.005 | -0.003 | -0.008 | -0.007 | -0.011 |
| 236 | 0      | 0      | -0.005 | -0.003 | -0.008 | -0.007 | -0.011 |
| 235 | 0      | 0      | -0.005 | -0.003 | -0.008 | -0.007 | -0.011 |
| 234 | 0      | 0.001  | -0.005 | -0.003 | -0.008 | -0.007 | -0.011 |
| 233 | 0      | 0.001  | -0.005 | -0.003 | -0.008 | -0.007 | -0.012 |
| 232 | -0.001 | 0      | -0.005 | -0.003 | -0.009 | -0.008 | -0.013 |
| 231 | -0.001 | 0      | -0.006 | -0.004 | -0.011 | -0.009 | -0.015 |
| 230 | -0.001 | 0      | -0.007 | -0.004 | -0.012 | -0.01  | -0.017 |
| 229 | -0.002 | 0      | -0.01  | -0.006 | -0.014 | -0.013 | -0.021 |
| 228 | -0.003 | -0.002 | -0.012 | -0.009 | -0.019 | -0.017 | -0.024 |
| 227 | -0.004 | -0.004 | -0.015 | -0.012 | -0.023 | -0.019 | -0.03  |
| 226 | -0.008 | -0.008 | -0.02  | -0.015 | -0.028 | -0.025 | -0.035 |
| 225 | -0.006 | -0.005 | -0.019 | -0.013 | -0.029 | -0.025 | -0.035 |
| 224 | -0.009 | -0.007 | -0.024 | -0.018 | -0.032 | -0.028 | -0.037 |
| 223 | -0.006 | -0.006 | -0.022 | -0.019 | -0.033 | -0.029 | -0.04  |
| 222 | -0.011 | -0.008 | -0.024 | -0.019 | -0.036 | -0.029 | -0.043 |
| 221 | -0.006 | -0.008 | -0.022 | -0.02  | -0.033 | -0.029 | -0.036 |
| 220 | -0.007 | -0.005 | -0.021 | -0.018 | -0.034 | -0.03  | -0.038 |
| 219 | -0.008 | -0.006 | -0.023 | -0.021 | -0.03  | -0.028 | -0.034 |
| 218 | -0.01  | -0.008 | -0.017 | -0.017 | -0.023 | -0.021 | -0.029 |
| 217 | -0.008 | -0.004 | -0.014 | -0.013 | -0.02  | -0.018 | -0.023 |
| 216 | -0.003 | 0.002  | -0.001 | -0.006 | -0.006 | -0.005 | -0.011 |
| 215 | -0.001 | 0.011  | 0.007  | 0.002  | 0.005  | 0.005  | 0.005  |
| 214 | 0.004  | 0.021  | 0.025  | 0.017  | 0.024  | 0.023  | 0.023  |
| 213 | 0.011  | 0.03   | 0.04   | 0.025  | 0.042  | 0.04   | 0.045  |
| 212 | 0.017  | 0.037  | 0.048  | 0.034  | 0.061  | 0.058  | 0.063  |
| 211 | 0.031  | 0.058  | 0.07   | 0.055  | 0.089  | 0.085  | 0.095  |
| 210 | 0.028  | 0.07   | 0.095  | 0.074  | 0.117  | 0.106  | 0.123  |
| 209 | 0.045  | 0.077  | 0.118  | 0.09   | 0.134  | 0.127  | 0.14   |
| 208 | 0.054  | 0.106  | 0.138  | 0.111  | 0.155  | 0.145  | 0.164  |
| 207 | 0.083  | 0.14   | 0.167  | 0.152  | 0.191  | 0.175  | 0.208  |
| 206 | 0.118  | 0.159  | 0.21   | 0.154  | 0.249  | 0.216  | 0.248  |
| 205 | 0.107  | 0.215  | 0.267  | 0.219  | 0.285  | 0.277  | 0.295  |
| 204 | 0.087  | 0.184  | 0.271  | 0.213  | 0.327  | 0.288  | 0.326  |
| 203 | 0.258  | 0.296  | 0.366  | 0.313  | 0.417  | 0.392  | 0.443  |
| 202 | 0.329  | 0.43   | 0.454  | 0.425  | 0.501  | 0.462  | 0.539  |
| 201 | -0.104 | -0.183 | -0.443 | -0.337 | -0.501 | -0.483 | -0.593 |
| 200 | -0.106 | -0.185 | -0.446 | -0.323 | -0.502 | -0.462 | -0.623 |

---

## VII. Characterization of substrates and products

### 3-methyl-2-(perfluorohexyl)-1H-indole (3a)

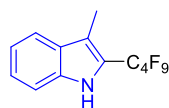

White solid, 28 mg, 80% yield; m.p. 67-69 °C;

**<sup>1</sup>H NMR** (400 MHz, CDCl<sub>3</sub>) δ 8.15 (s, 1H), 7.66 (d, *J* = 8.0 Hz, 1H), 7.40 (d, *J* = 8.3 Hz, 1H), 7.34 (t, *J* = 7.6 Hz, 1H), 7.24 – 7.16 (m, 1H), 2.44 (t, *J* = 2.3 Hz, 3H).

**<sup>13</sup>C NMR** (101 MHz, CDCl<sub>3</sub>) δ 136.0, 128.4, 125.0, 120.4, 120.1, 119.4 (d, *J* = 28.3 Hz), 116.8 (t, *J* = 3.5 Hz), 111.5, 8.6 (t, *J* = 2.0 Hz).

**<sup>19</sup>F NMR** (376 MHz, CDCl<sub>3</sub>) δ -80.95 (t, *J* = 9.9 Hz, 3F), -108.79 to -108.89 (m, 2F), -122.98 to -123.07 (m, 2F), -125.92 to -126.04 (m, 2F).

**HRMS** (ESI, m/z): Mass calcd. for C<sub>13</sub>H<sub>7</sub>F<sub>9</sub>N<sup>+</sup> [M-H]<sup>+</sup>, 348.0440; found: 348.0454.

### 4-chloro-3-methyl-2-(perfluorobutyl)-1H-indole (3b)

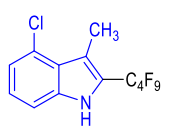

Yellow solid, 25.3 mg, 66% yield; m.p. 54-56 °C;

**<sup>1</sup>H NMR** (400 MHz, CDCl<sub>3</sub>) δ 8.27 (s, 1H), 7.26 (dd, *J* = 8.1, 1.1 Hz, 1H), 7.18 (t, *J* = 7.9 Hz, 1H), 7.12 (dd, *J* = 7.6, 1.2 Hz, 1H), 2.67 (t, *J* = 2.1 Hz, 3H).

**<sup>13</sup>C NMR** (101 MHz, CDCl<sub>3</sub>) δ 137.3, 128.3, 125.3, 124.9, 121.7, 120.4 (t, *J* = 27.6 Hz), 117.4 (t, *J* = 3.3 Hz), 110.4, 10.8 (t, *J* = 2.2 Hz).

**<sup>19</sup>F NMR** (377 MHz, CDCl<sub>3</sub>) δ -81.00 (t, *J* = 9.9 Hz, 3F), -108.70 (t, *J* = 13.1 Hz, 2F), -122.88 to -122.99 (m, 2F), -125.91 to -126.04 (m, 2F).

**HRMS** (ESI, m/z): Mass calcd. for C<sub>13</sub>H<sub>6</sub>ClF<sub>9</sub>N<sup>+</sup> [M-H]<sup>+</sup>, 382.0051; found: 382.0068.

### 4-bromo-3-methyl-2-(perfluorobutyl)-1H-indole (3c)

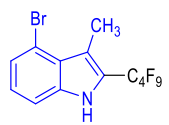

Yellow solid, 26.7 mg, 62% yield; m.p. 66-68 °C;

**<sup>1</sup>H NMR** (400 MHz, CDCl<sub>3</sub>) δ 8.28 (s, 1H), 7.37 – 7.30 (m, 2H), 7.11 (t, *J* = 7.9 Hz, 1H), 2.68 (t, *J* = 1.9 Hz, 3H).

**<sup>13</sup>C NMR** (101 MHz, CDCl<sub>3</sub>) δ 137.2, 126.0, 125.6, 125.3, 120.4 (t, *J* = 30.1 Hz), 117.9 (t, *J* = 3.2 Hz), 115.9, 111.0, 11.0 (t, *J* = 2.0 Hz).

**<sup>19</sup>F NMR** (377 MHz, CDCl<sub>3</sub>) δ -80.96 (t, *J* = 9.8 Hz, 3F), -108.62 (t, *J* = 13.0 Hz, 2F), -122.81 to -122.95 (m, 2F), -125.87 to -126.04 (m, 2F).

**HRMS** (ESI, m/z): Mass calcd. for C<sub>13</sub>H<sub>6</sub>BrF<sub>9</sub>N<sup>+</sup> [M-H]<sup>+</sup>, 425.9545; found: 425.9560.

### 4-(benzyloxy)-3-methyl-2-(perfluorobutyl)-1H-indole (3d)

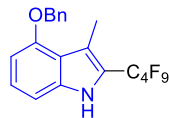

White solid, 28 mg, 61% yield; m.p. 79-81 °C;

**<sup>1</sup>H NMR** (400 MHz, CDCl<sub>3</sub>) δ 8.12 (s, 1H), 7.49 (d, *J* = 7.0 Hz, 2H), 7.40 (t, *J* = 6.8 Hz, 2H), 7.34 (t, *J* = 6.8 Hz, 1H), 7.18 (t, *J* = 8.0 Hz, 1H), 6.97 (d, *J* = 8.2 Hz, 1H), 6.58 (d, *J* = 7.8 Hz, 1H), 5.19 (s, 2H), 2.60 (t, *J* = 2.0 Hz, 3H).

**<sup>13</sup>C NMR** (101 MHz, CDCl<sub>3</sub>) δ 155.1, 137.7, 137.1, 128.6, 127.9, 127.3, 125.8, 118.5, 117.8 (t, *J* = 29.3 Hz), 104.7, 101.2, 69.9, 11.1, 1.0.

**<sup>19</sup>F NMR** (377 MHz, CDCl<sub>3</sub>) δ -80.98 (t, *J* = 9.8 Hz, 3F), -108.43 to -108.52 (m, 2F), -122.97 to -123.06 (m, 2F), -125.93 to -126.02 (m, 2F).

**HRMS** (ESI, m/z): Mass calcd. for C<sub>20</sub>H<sub>13</sub>F<sub>9</sub>NO<sup>+</sup> [M-H]<sup>+</sup>, 454.0859; found: 454.0871.

### 3,5-dimethyl-2-(perfluorobutyl)-1H-indole (3e)

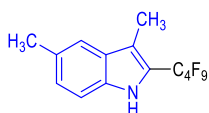

Yellow solid, 29 mg, 80% yield; m.p. 60-62°C;

**<sup>1</sup>H NMR** (400 MHz, CDCl<sub>3</sub>) δ 8.05 (s, 1H), 7.42 (s, 1H), 7.29 – 7.20 (m, 1H), 7.15 (d, *J* = 8.4 Hz, 1H), 2.47 (s, 3H), 2.40 (t, *J* = 2.3 Hz, 3H).

**<sup>13</sup>C NMR** (101 MHz, CDCl<sub>3</sub>) δ 137.2, 137.1, 133.9, 133.7, 128.8, 128.6, 128.5, 31.8 (d, *J* = 43.7 Hz), 22.7, 14.2.

**<sup>19</sup>F NMR** (377 MHz, CDCl<sub>3</sub>) δ -80.99 (t, *J* = 9.8 Hz, 3F), -108.73 to -108.85 (m, 2F), -123.01 to -123.13 (m, 2F), -125.93 to -126.10 (m, 2F).

**HRMS** (ESI, m/z): Mass calcd. for C<sub>14</sub>H<sub>9</sub>F<sub>9</sub>N<sup>+</sup> [M-H]<sup>+</sup>, 362.0597; found: 362.0611.

### 5-methoxy-3-methyl-2-(perfluorobutyl)-1H-indole (3f)

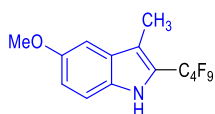

White solid, 21.0 mg, 55% yield; m.p. 58-61 °C;

**<sup>1</sup>H NMR** (400 MHz, CDCl<sub>3</sub>) δ 8.12 (s, 1H), 7.27 (d, *J* = 8.8 Hz, 1H), 7.04 – 6.97 (m, 2H), 3.88 (s, 3H), 2.40 (d, *J* = 2.4 Hz, 3H).

**<sup>13</sup>C NMR** (101 MHz, CDCl<sub>3</sub>) δ 154.5, 131.1, 128.7, 119.9 (t, *J* = 28.3 Hz), 116.1 (t, *J* = 3.4 Hz), 116.0, 112.5, 100.7, 55.8, 8.7.

**<sup>19</sup>F NMR** (377 MHz, CDCl<sub>3</sub>) δ -80.98 (t, *J* = 9.6 Hz, 3F), -108.80 (t, *J* = 12.6 Hz, 2F), -123.03 (q, *J* = 9.2 Hz, 2F), -125.94 to -126.05 (m, 2F).

**HRMS** (ESI, m/z): Mass calcd. for C<sub>14</sub>H<sub>9</sub>F<sub>9</sub>NO<sup>+</sup> [M-H]<sup>+</sup>, 378.0546; found: 378.0562.

### 5-(benzyloxy)-3-methyl-2-(perfluorobutyl)-1H-indole (3g)

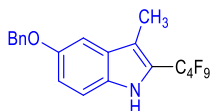

White solid, 19.6 mg, 43% yield; m.p. 93-95 °C;

**<sup>1</sup>H NMR** (400 MHz, CDCl<sub>3</sub>) δ 8.08 (s, 1H), 7.48 (d, *J* = 7.1 Hz, 2H), 7.44 – 7.35 (m, 2H), 7.33 (dd, *J* = 8.4, 6.1 Hz, 1H), 7.28 (d, *J* = 8.8 Hz, 1H), 7.12 (d, *J* = 2.4 Hz, 1H), 7.07 (dd, *J* = 8.8, 2.5 Hz, 1H), 5.12 (s, 2H), 2.38 (t, *J* = 2.2 Hz, 3H).

**<sup>13</sup>C NMR** (101 MHz, CDCl<sub>3</sub>) δ 153.7, 137.3, 131.3, 128.7, 128.6, 128.0, 127.7, 120.0 (t, *J* = 28.6 Hz), 116.6, 116.2 (t, *J* = 3.4 Hz), 112.5, 102.4, 70.8, 8.7.

**<sup>19</sup>F NMR** (377 MHz, CDCl<sub>3</sub>) δ -80.97 (t, *J* = 9.7 Hz, 3F), -108.81 (t, *J* = 12.9 Hz, 2F), -122.89 to -123.12 (m, 2F), -125.92 to -126.04 (m, 2F).

**HRMS** (ESI, m/z): Mass calcd. for C<sub>20</sub>H<sub>13</sub>F<sub>9</sub>NO<sup>+</sup> [M-H]<sup>+</sup>, 454.0859; found: 454.087.

### 5-fluoro-3-methyl-2-(perfluorobutyl)-1H-indole (3h)

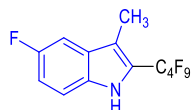

Yellow oil, 27 mg, 74% yield;

**<sup>1</sup>H NMR** (400 MHz, CDCl<sub>3</sub>) δ 8.12 (s, 1H), 7.27 (d, *J* = 8.8 Hz, 1H), 7.04 – 6.97 (m, 2H), 3.88 (s, 3H), 2.40 (d, *J* = 2.4 Hz, 3H).

**<sup>13</sup>C NMR** (101 MHz, CDCl<sub>3</sub>) δ 159.2, 156.9, 132.4, 128.7 (d, *J* = 9.5 Hz), 121.1 (t, *J* = 28.1 Hz), 113.9 (d, *J* = 26.9 Hz), 112.5 (d, *J* = 9.5 Hz), 104.8 (d, *J* = 23.6 Hz), 8.6.

**<sup>19</sup>F NMR** (376 MHz, CDCl<sub>3</sub>) δ -81.01 (t, *J* = 10.0 Hz, 3F), -109.18 (t, *J* = 12.8 Hz, 2F), -122.88 (s, 1F), -123.02 to -123.15 (m, 2F), -126.00 to -126.11 (m, 2F).

**HRMS** (ESI, m/z): Mass calcd. for C<sub>13</sub>H<sub>6</sub>F<sub>10</sub>N<sup>+</sup> [M-H]<sup>+</sup>, 366.0346; found: 366.0357.

### 5-chloro-3-methyl-2-(perfluorobutyl)-1H-indole (3i)

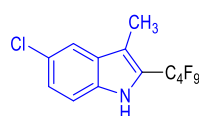

White solid, 26.9 mg, 70% yield; m.p. 59-61 °C;

**<sup>1</sup>H NMR** (400 MHz, CDCl<sub>3</sub>) δ 8.23 (s, 1H), 7.61 (s, 1H), 7.32 – 7.25 (m, 2H), 2.38 (t, *J* = 2.3 Hz, 3H).

**<sup>13</sup>C NMR** (101 MHz, CDCl<sub>3</sub>) δ 134.2, 129.4, 126.3, 125.5, 120.7 (t, *J* = 28.3 Hz), 119.6, 116.3 (t, *J* = 3.4 Hz), 112.7, 8.5.

**<sup>19</sup>F NMR** (377 MHz, CDCl<sub>3</sub>) δ -80.96 (t, *J* = 9.7 Hz, 3F), -109.04 to -109.20 (m, 2F), -122.97 to -123.09 (m, 2F), -125.93 to -126.04 (m, 2F).

**HRMS** (ESI, m/z): Mass calcd. for C<sub>13</sub>H<sub>6</sub>ClF<sub>9</sub>N<sup>+</sup> [M-H]<sup>+</sup>, 382.0051; found: 382.0065.

### 5-bromo-3-methyl-2-(perfluorobutyl)-1H-indole (3j)

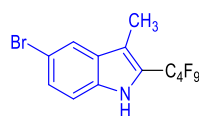

Yellow oil, 36.4 mg, 85% yield;

**<sup>1</sup>H NMR** (400 MHz, CDCl<sub>3</sub>) δ 8.23 (s, 1H), 7.78 (d, *J* = 1.8 Hz, 1H), 7.41 (dd, *J* = 8.7, 1.9 Hz, 1H), 7.27 (d, *J* = 8.8 Hz, 1H), 2.39 (t, *J* = 4.0 Hz, 3H).

**<sup>13</sup>C NMR** (101 MHz, CDCl<sub>3</sub>) δ 134.5, 130.0, 128.0, 122.8, 120.6 (t, *J* = 28.5 Hz), 116.2 (t, *J* = 3.5 Hz), 113.6, 113.1, 8.5 (d, *J* = 1.1 Hz).

**<sup>19</sup>F NMR** (376 MHz, CDCl<sub>3</sub>) δ -80.98 (t, *J* = 9.8 Hz, 3F), -109.10 to -109.21 (m, 2F), -123.01 to -123.10 (m, 2F), -125.97 to -126.06 (m, 2F).

**HRMS** (ESI, m/z): Mass calcd. for C<sub>13</sub>H<sub>6</sub>BrF<sub>9</sub>N<sup>+</sup> [M-H]<sup>+</sup>, 425.9545; found: 425.9555.

### 3,6-dimethyl-2-(perfluorobutyl)-1H-indole (3k)

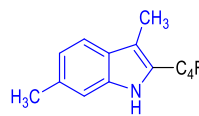

Yellow solid, 24.0 mg, 66% yield; m.p. 64-66 °C;

**<sup>1</sup>H NMR** (400 MHz, CDCl<sub>3</sub>) δ 8.02 (s, 1H), 7.52 (d, *J* = 8.2 Hz, 1H), 7.15 (s, 1H), 7.02 (dd, *J* = 8.3, 1.4 Hz, 1H), 2.47 (s, 3H), 2.40 (t, *J* = 2.4 Hz, 3H).

**<sup>13</sup>C NMR** (101 MHz, CDCl<sub>3</sub>) δ 136.4, 135.1, 126.3, 122.3, 119.7, 118.6 (d, *J* = 28.3 Hz), 116.6 (t, *J* = 3.0 Hz), 111.3, 21.8, 8.6.

**<sup>19</sup>F NMR** (376 MHz, CDCl<sub>3</sub>) δ -80.98 (t, *J* = 9.7 Hz, 3F), -108.69 to -108.78 (m, 2F), -123.05 to -123.15 (m, 2F), -125.97 to -126.07 (m, 2F).

**HRMS** (ESI, m/z): Mass calcd. for C<sub>14</sub>H<sub>9</sub>F<sub>9</sub>N<sup>+</sup> [M-H]<sup>+</sup>, 362.0597; found: 362.0616.

### 6-methoxy-3-methyl-2-(perfluorobutyl)-1H-indole (3l)

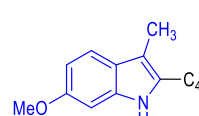

White solid, 24 mg, 63% yield; m. p. 62-64 °C;

**<sup>1</sup>H NMR** (400 MHz, CDCl<sub>3</sub>) δ 8.04 (s, 1H), 7.51 (d, *J* = 8.7 Hz, 1H), 6.88 – 6.79 (m, 2H), 3.85 (s, 3H), 2.39 (t, *J* = 2.1 Hz, 3H).

**<sup>13</sup>C NMR** (101 MHz, CDCl<sub>3</sub>) δ 158.5, 136.8, 122.7, 120.9, 117.9, 116.9 (t, *J* = 2.7 Hz), 111.2, 93.9, 55.6, 8.7.

**<sup>19</sup>F NMR** (376 MHz, CDCl<sub>3</sub>) δ -80.98 (t, *J* = 9.8 Hz, 3F), -108.58 to -108.67 (m, 2F), -123.08 to -123.17 (m, 2F), -125.99 to -126.08 (m, 2F).

**HRMS** (ESI, m/z): Mass calcd. For C<sub>14</sub>H<sub>9</sub>F<sub>9</sub>NO<sup>+</sup> [M-H]<sup>+</sup>, 378.0546; found: 378.0561.

### 6-fluoro-3-methyl-2-(perfluorobutyl)-1H-indole (3m)

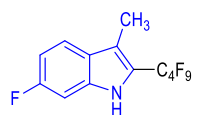

Yellow oil, 22.4 mg, 63% yield;

**<sup>1</sup>H NMR** (400 MHz, CDCl<sub>3</sub>) δ 8.20 (s, 1H), 7.57 (dd, *J* = 8.8, 5.2 Hz, 1H), 7.06 (dd, *J* = 9.3, 2.2 Hz, 1H), 6.96 (td, *J* = 9.1, 2.3 Hz, 1H), 2.41 (t, *J* = 2.3 Hz, 3H).

**$^{13}\text{C}$  NMR** (101 MHz,  $\text{CDCl}_3$ )  $\delta$  162.7, 160.3, 135.9 (d,  $J = 13.0$  Hz), 125.0, 121.3 (d,  $J = 10.6$  Hz), 109.7 (d,  $J = 24.9$  Hz), 97.7 (d,  $J = 26.3$  Hz), 8.6, 1.0.

**$^{19}\text{F}$  NMR** (376 MHz,  $\text{CDCl}_3$ )  $\delta$  -80.94 – -81.05 (m, 3F), -109.01 (t,  $J = 12.9$  Hz, 2F), -116.74 (s, 1F), -123.04 to -123.17 (m, 2F), -125.98 to -126.08 (m, 2F).

**HRMS** (ESI,  $m/z$ ): Mass calcd. for  $\text{C}_{13}\text{H}_6\text{F}_{10}\text{N}^+$   $[\text{M}-\text{H}]^+$ , 366.0346; found: 366.0363.

### 6-chloro-3-methyl-2-(perfluorobutyl)-1H-indole (3n)

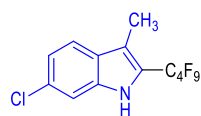

Yellow oil, 34.5 mg, 90% yield;

**$^1\text{H}$  NMR** (400 MHz,  $\text{CDCl}_3$ )  $\delta$  8.21 (s, 1H), 7.55 (d,  $J = 8.6$  Hz, 2H), 7.39 (d,  $J = 1.8$  Hz, 2H), 7.16 (dd,  $J = 8.6, 1.8$  Hz, 2H), 2.41 (t,  $J = 2.3$  Hz, 3H).

**$^{13}\text{C}$  NMR** (101 MHz,  $\text{CDCl}_3$ )  $\delta$  136.1, 131.0, 126.9, 121.4, 121.1, 120.0 (t,  $J = 28.4$  Hz), 116.8, 111.4, 8.6.

**$^{19}\text{F}$  NMR** (377 MHz,  $\text{CDCl}_3$ )  $\delta$  -80.94 (t,  $J = 10.0$  Hz, 3F), -109.21 to -109.43 (m, 2F), -123.00 (q,  $J = 9.1, 8.7$  Hz, 2F), -125.89 to -126.00 (m, 2F)

**HRMS** (ESI,  $m/z$ ): Mass calcd. for  $\text{C}_{13}\text{H}_6\text{ClF}_9\text{N}^+$   $[\text{M}-\text{H}]^+$ , 382.0051; found: 382.0062.

### 3,7-dimethyl-2-(perfluorobutyl)-1H-indole (3o)

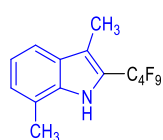

White solid, 31.6 mg, 87% yield; m.p. 68-70 °C;

**$^1\text{H}$  NMR** (400 MHz,  $\text{CDCl}_3$ )  $\delta$  8.02 (s, 1H), 7.55 – 7.43 (m, 1H), 7.14 – 7.11 (m, 2H), 2.50 (s, 3H), 2.43 (t,  $J = 1.9$  Hz, 3H).

**$^{13}\text{C}$  NMR** (101 MHz,  $\text{CDCl}_3$ )  $\delta$  135.7, 128.0, 125.3, 120.8 (d,  $J = 13.9$  Hz), 119.2 (t,  $J = 28.1$  Hz), 117.7, 117.3 (t,  $J = 3.6$  Hz), 16.5, 8.8, 1.0.

**$^{19}\text{F}$  NMR** (376 MHz,  $\text{CDCl}_3$ )  $\delta$  -80.98 (t,  $J = 9.7$  Hz, 3F), -108.68 to -108.78 (m, 2F), -122.87 to -123.01 (m, 2F), -125.93 to -126.05 (m, 2F).

**HRMS** (ESI,  $m/z$ ): Mass calcd. for  $\text{C}_{14}\text{H}_9\text{F}_9\text{N}^+$   $[\text{M}-\text{H}]^+$ , 362.0597; found: 362.0615.

### 7-chloro-3-methyl-2-(perfluorobutyl)-1H-indole (3p)

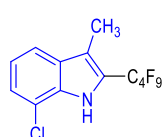

Yellow oil, 25 mg, 65% yield;

**$^1\text{H}$  NMR** (400 MHz,  $\text{CDCl}_3$ )  $\delta$  8.31 (s, 1H), 7.55 (d,  $J = 8.0$  Hz, 1H), 7.33 (d,  $J = 7.6$  Hz, 1H), 7.13 (t,  $J = 7.8$  Hz, 1H), 2.43 (t,  $J = 2.3$  Hz, 3H).

**$^{13}\text{C}$  NMR** (101 MHz,  $\text{CDCl}_3$ )  $\delta$  133.3, 129.6, 124.2, 121.2, 118.8, 117.7 (t,  $J = 3.3$  Hz), 117.0, 8.8.

**$^{19}\text{F}$  NMR** (376 MHz,  $\text{CDCl}_3$ )  $\delta$  -80.98 (t,  $J = 9.7$  Hz, 3F), -109.10 (t,  $J = 13.0$  Hz, 2F), -122.89 to -122.99 (m, 2F), -125.95 to -126.04 (m, 2F).

**HRMS** (ESI,  $m/z$ ): Mass calcd. for  $\text{C}_{13}\text{H}_6\text{ClF}_9\text{N}^+$   $[\text{M}-\text{H}]^+$ , 382.0051; found: 382.0060.

### 7-bromo-3-methyl-2-(perfluorobutyl)-1H-indole (3q)

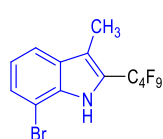

White solid, 23.1 mg, 54% yield; m.p. 53-55 °C;

**$^1\text{H}$  NMR** (400 MHz,  $\text{CDCl}_3$ )  $\delta$  8.26 (s, 1H), 7.59 (d,  $J = 8.0$  Hz, 1H), 7.48 (d,  $J = 7.6$  Hz, 1H), 7.08 (t,  $J = 7.8$  Hz, 1H), 2.43 (d,  $J = 2.3$  Hz, 3H).

**$^{13}\text{C}$  NMR** (101 MHz,  $\text{CDCl}_3$ )  $\delta$  134.7, 129.3, 127.3, 121.6, 120.2 (t,  $J = 28.4$  Hz), 119.4, 117.8 (t,  $J = 3.5$  Hz), 104.9, 8.9.

**$^{19}\text{F}$  NMR** (376 MHz,  $\text{CDCl}_3$ )  $\delta$  -80.97 (t,  $J = 10.4$  Hz, 3F), -109.10 (t,  $J = 12.7$  Hz, 2F), -122.91 (q,  $J = 9.8$  Hz, 2F), -125.99 (t,  $J = 13.7$  Hz, 2F).

**HRMS** (ESI, m/z): Mass calcd. for C<sub>13</sub>H<sub>6</sub>BrF<sub>9</sub>N<sup>+</sup> [M-H]<sup>+</sup>, 425.9545; found: 425.9555.

### 1,3-Dimethyl-2-(perfluorohexyl)-1H-indole (3r)

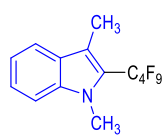

White solid, 20.3 mg, 56% yield; m.p. 68-70°C;

**<sup>1</sup>H NMR** (400 MHz, CDCl<sub>3</sub>) δ 7.65 (d, *J* = 8.0 Hz, 1H), 7.41 – 7.30 (m, 2H), 7.22 – 7.14 (m, 1H), 3.78 (s, 3H), 2.44 (t, *J* = 3.1 Hz, 3H).

**<sup>13</sup>C NMR** (101 MHz, CDCl<sub>3</sub>) δ 138.4, 127.3, 124.7, 120.8, 120.1, 120.0, 117.7 (t, *J* = 3.6 Hz), 109.8, 31.6 (m), 9.1 (t, *J* = 3.5 Hz).

**<sup>19</sup>F NMR** (376 MHz, CDCl<sub>3</sub>) δ -80.90 to -81.00 (m, 3F), -104.16 to -104.29 (m, 2F), -122.34 to -122.47 (m, 2F), -125.97 to -126.08 (m, 2F).

**HRMS** (ESI, m/z): Mass calcd. for C<sub>14</sub>H<sub>9</sub>F<sub>9</sub>N<sup>+</sup> [M-H]<sup>+</sup>, 362.0597; found: 362.0587.

### 1-Benzyl-3-methyl-2-(perfluorobutyl)-1H-indole (3s)

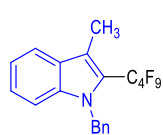

White solid, 21.1 mg, 48% yield; m.p. 48-50 °C;

**<sup>1</sup>H NMR** (400 MHz, CDCl<sub>3</sub>) δ 7.69 (d, *J* = 7.9 Hz, 1H), 7.27 (d, *J* = 8.1 Hz, 1H), 7.20 (dt, *J* = 15.0, 7.4 Hz, 5H), 6.93 (d, *J* = 6.9 Hz, 2H), 5.43 (s, 2H), 2.50 (t, *J* = 2.7 Hz, 3H).

**<sup>13</sup>C NMR** (101 MHz, CDCl<sub>3</sub>) δ 138.3, 137.7, 128.7, 127.8, 127.3, 125.6, 125.1, 120.8 (t, *J* = 28.0 Hz), 120.4, 120.2, 118.3 (t, *J* = 3.8 Hz), 110.7, 48.8 (d, *J* = 2.2 Hz), 9.3.

**<sup>19</sup>F NMR** (377 MHz, CDCl<sub>3</sub>) δ -80.92 (t, *J* = 9.7 Hz, 3F), -103.82 to -103.95 (m, 2F), -122.22 to -122.32 (m, 2F), -125.82 to -125.93 (m, 2F).

**HRMS** (ESI, m/z): Mass calcd. for C<sub>20</sub>H<sub>15</sub>F<sub>9</sub>N<sup>+</sup> [M+H]<sup>+</sup>, 440.1055; found: 440.1048.

### 3-methyl-2-(perfluorobutyl)-1-phenyl-1H-indole (3t)

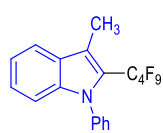

Colorless oil, 15 mg, 35% yield;

**<sup>1</sup>H NMR** (400 MHz, CDCl<sub>3</sub>) δ 7.70 (dd, *J* = 7.0, 1.6 Hz, 1H), 7.51 – 7.45 (m, 2H), 7.32 (dd, *J* = 6.4, 3.1 Hz, 2H), 7.22 (qd, *J* = 7.6, 7.0, 1.3 Hz, 2H), 6.84 (dd, *J* = 7.5, 1.5 Hz, 1H), 2.53 (t, *J* = 2.7 Hz, 3H).

**<sup>13</sup>C NMR** (101 MHz, CDCl<sub>3</sub>) δ 140.3, 137.9, 129.4, 128.9, 128.8, 127.2, 125.1, 120.6, 119.8, 118.8 (t, *J* = 3.2 Hz), 111.3, 9.3.

**<sup>19</sup>F NMR** (376 MHz, CDCl<sub>3</sub>) δ -80.98 (t, *J* = 9.9 Hz, 3F), -102.94 to -103.06 (m, 2F), -121.50 to -121.62 (m, 2F), -126.04 to -126.17 (m, 2F).

**HRMS** (ESI, m/z): Mass calcd. for C<sub>19</sub>H<sub>11</sub>F<sub>9</sub>N<sup>+</sup> [M-H]<sup>+</sup>, 424.0753; found: 424.0710.

### 3-ethyl-2-(perfluorobutyl)-1H-indole (3u)

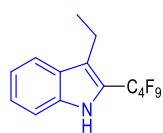

White solid, 24 mg 66% yield; m.p. 49-51 °C;

**<sup>1</sup>H NMR** (400 MHz, CDCl<sub>3</sub>) δ 8.14 (s, 1H), 7.70 (d, *J* = 8.1 Hz, 1H), 7.39 (d, *J* = 8.3 Hz, 1H), 7.32 (t, *J* = 7.6 Hz, 1H), 7.21 – 7.16 (m, 1H), 2.90 (q, *J* = 7.5 Hz, 3H), 1.29 (t, *J* = 7.6 Hz, 3H).

**<sup>13</sup>C NMR** (101 MHz, CDCl<sub>3</sub>) δ 136.2, 127.4, 124.9, 123.4 (t, *J* = 3.0 Hz), 120.4, 118.7 (t, *J* = 28.5 Hz), 111.7, 17.4, 15.6.

**<sup>19</sup>F NMR** (376 MHz, CDCl<sub>3</sub>) δ -81.00 (t, *J* = 10.0 Hz, 3F), -108.27 (t, *J* = 13.1 Hz, 2F), -122.91 to -123.04 (m, 2F), -125.89 to -125.99 (m, 2F)

(m).

**HRMS** (ESI, m/z): Mass calcd. for C<sub>14</sub>H<sub>9</sub>F<sub>9</sub>N<sup>+</sup> [M-H]<sup>+</sup>, 362.0597; found: 362.0614.

### Methyl 2-(2-(perfluorobutyl)-1H-indol-3-yl)acetate (3v)

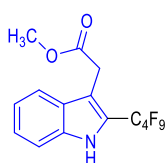

White solid, 23.6 mg, 58% yield; m.p. 61-63 °C;

**<sup>1</sup>H NMR** (400 MHz, CDCl<sub>3</sub>) δ 8.51 (s, 1H), 7.66 (d, *J* = 8.0 Hz, 1H), 7.37 (d, *J* = 8.3 Hz, 1H), 7.37 – 7.28 (m, 1H), 7.25 – 7.17 (m, 1H), 3.92 (s, 2H), 3.69 (s, 3H).

**<sup>13</sup>C NMR** (101 MHz, CDCl<sub>3</sub>) δ 171.2, 135.9, 127.6, 125.3, 121.1, 120.7 (d, *J* = 29.1 Hz), 120.2, 113.0 (t, *J* = 3.0 Hz), 111.8, 52.2, 29.8.

**<sup>19</sup>F NMR** (376 MHz, CDCl<sub>3</sub>) δ -80.94 (t, *J* = 10.1 Hz, 3F), -108.35 (t, *J* = 13.0 Hz, 2F), -122.89 (dd, *J* = 17.4, 7.7 Hz, 2F), -125.80 to -125.97 (m, 2F).

**HRMS** (ESI, m/z): Mass calcd. for C<sub>15</sub>H<sub>9</sub>F<sub>9</sub>NO<sub>2</sub><sup>+</sup> [M-H]<sup>+</sup>, 406.0495; found: 406.0508.

### methyl 3-(2-(perfluorobutyl)-1H-indol-3-yl)propanoate (3w)

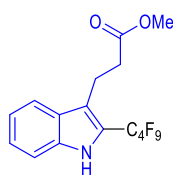

Yellow oil, 28.2 mg, 67% yield;

**<sup>1</sup>H NMR** (400 MHz, CDCl<sub>3</sub>) δ 8.42 (s, 1H), 7.69 (d, *J* = 8.1 Hz, 1H), 7.41 (d, *J* = 8.2 Hz, 1H), 7.34 (d, *J* = 7.4 Hz, 1H), 7.20 (s, 1H), 3.70 (s, 3H), 3.26 – 3.20 (m, 1H), 2.73 – 2.62 (m, 2H).

**<sup>13</sup>C NMR** (101 MHz, CDCl<sub>3</sub>) δ 173.4, 136.1, 127.1, 125.1, 120.7, 120.1, 119.3 (t, *J* = 2.0 Hz), 119.3 (q, *J* = 57.3 Hz, 28.9 Hz), 111.8, 51.8, 35.4, 19.6.

**<sup>19</sup>F NMR** (377 MHz, CDCl<sub>3</sub>) δ -80.98 (t, *J* = 9.9 Hz, 3F), -108.26 (t, *J* = 13.0 Hz, 2F), -122.85 (q, *J* = 9.7, 9.1 Hz, 2F), -125.86 (dd, *J* = 16.2, 10.8 Hz, 2F).

**HRMS** (ESI, m/z): Mass calcd. for C<sub>16</sub>H<sub>11</sub>F<sub>9</sub>NO<sub>2</sub><sup>+</sup> [M-H]<sup>+</sup>, 420.0652; found: 420.0670.

### 2-(perfluorobutyl)-1H-indole-3-carbonitrile (3x)

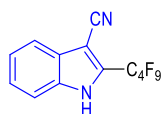

White solid, 22.8 mg, 61% yield; m.p. 111-113°C;

**<sup>1</sup>H NMR** (400 MHz, CDCl<sub>3</sub>) δ 9.32 (s, 1H), 7.87 (d, *J* = 8.1 Hz, 1H), 7.60 – 7.53 (m, 1H), 7.54 – 7.45 (m, 1H), 7.41 (td, *J* = 7.6, 7.0, 1.1 Hz, 1H), 1.67 – 1.63 (m, 3H).

**<sup>13</sup>C NMR** (151 MHz, CDCl<sub>3</sub>) δ 135.1, 127.3, 126.9, 123.8, 122.1, 120.6, 112.7, 112.5.

**<sup>19</sup>F NMR** (376 MHz, CDCl<sub>3</sub>) δ -80.84 (t, *J* = 10.2 Hz, 3F), -109.87 to -109.96 (m, 2F), -122.46 (q, *J* = 9.8 Hz, 2F), -125.74 (t, *J* = 13.5 Hz, 2F).

**HRMS** (ESI, m/z): Mass calcd. for C<sub>13</sub>H<sub>4</sub>F<sub>9</sub>N<sub>2</sub><sup>+</sup> [M-H]<sup>+</sup>, 359.0236; found: 359.0251.

### 3-methyl-2-(trifluoromethyl)-1H-indole (3ba)

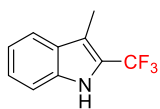

white solid, 11 mg, 55 % yield; m.p.76-78 °C;

**<sup>1</sup>H NMR** (500 MHz, CHLOROFORM-*D*) δ 8.17 (s, 1H), 7.63 (d, *J* = 6.9 Hz, 1H), 7.37 (d, *J* = 5.6 Hz, 1H), 7.31 (t, *J* = 6.2 Hz, 1H), 7.18 (t, *J* = 6.0 Hz, 1H), 2.43 (s, 3H).

**<sup>13</sup>C NMR** (126 MHz, CHLOROFORM-*D*) δ 135.3, 128.2, 124.9, 123.3, 120.5, 120.2, 114.2 (d, *J* = 4.1 Hz), 111.6, 8.4.

**<sup>19</sup>F NMR** (377 MHz, CDCl<sub>3</sub>) δ -58.7.

**HRMS** (ESI, m/z): Mass calcd. for C<sub>10</sub>H<sub>7</sub>F<sub>3</sub>N<sup>+</sup> [M-H]<sup>+</sup>, 198.0536; found: 198.0540.

### 2-(perfluorobutyl)-3-methyl-1H-indole (3ca)

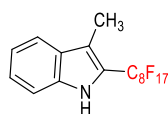

White solid; 39.5 mg, 72% yield; m.p. 73-75 °C;

**<sup>1</sup>H NMR** (400 MHz, CDCl<sub>3</sub>) δ 8.17 (s, 1H), 7.66 (d, *J* = 8.0 Hz, 1H), 7.40 (d, *J* = 8.2 Hz, 1H), 7.34 (t, *J* = 7.3 Hz, 1H), 7.25 – 7.17 (m, 1H), 2.44 (t, *J* = 2.3 Hz, 3H).

**<sup>13</sup>C NMR** (101 MHz, CDCl<sub>3</sub>) δ 135.9, 128.3, 125.0, 120.4, 120.1, 119.5 (t, *J* = 28.3 Hz), 116.7 (t,



$J = 3.2$  Hz), 111.5, 8.5.

**$^{19}\text{F}$  NMR** (376 MHz,  $\text{CDCl}_3$ )  $\delta$  -80.83 (t,  $J = 9.9$  Hz, 2F), -108.69 (t,  $J = 13.8$  Hz, 2F), -121.82 (d,  $J = 72.5$  Hz, 7F), -122.15 (d,  $J = 10.3$  Hz, 2F), -122.78 (2F), -126.12 to -126.26 (m, 2F).

**HRMS** (ESI,  $m/z$ ): Mass calcd. for  $\text{C}_{17}\text{H}_7\text{F}_{17}\text{N}^+$   $[\text{M}-\text{H}]^+$ , 548.0313; found: 548.0325.

### 3-methyl-2-(perfluoropropan-2-yl)-1H-indole (3da)

colorless oil, 20.7 mg, 69%;

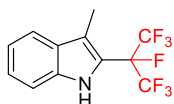

**$^1\text{H}$  NMR** (400 MHz,  $\text{CDCl}_3$ )  $\delta$  8.10 (s, 1H), 7.68 – 7.61 (m, 1H), 7.39 (dt,  $J = 8.2, 1.0$  Hz, 1H), 7.36 – 7.27 (m, 1H), 7.24 – 7.16 (m, 1H), 2.44 (d,  $J = 2.4$  Hz, 3H).

**$^{13}\text{C}$  NMR** (101 MHz,  $\text{CDCl}_3$ )  $\delta$  135.9, 128.5, 124.6, 120.4, 119.6, 116.7 (d,  $J = 24.6$  Hz), 116.0, 111.3, 29.7.

**$^{19}\text{F}$  NMR** (377 MHz,  $\text{CDCl}_3$ )  $\delta$  -75.68 (d,  $J = 8.3$  Hz, 6F), -182.23 to -182.44 (m, 1F).

**HRMS** (ESI,  $m/z$ ): Mass calcd. for  $\text{C}_{12}\text{H}_7\text{F}_7\text{N}^+$   $[\text{M}-\text{H}]^+$ , 298.0472; found: 298.0482

### 3-methyl-2-(perfluorocyclohexyl)-1H-indole (3ea)

White solid, 25.3 mg, 63% yield; m.p. 66-68 °C;

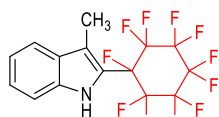

**$^1\text{H}$  NMR** (400 MHz,  $\text{CDCl}_3$ )  $\delta$  8.24 (s, 1H), 7.67 (d,  $J = 8.2$  Hz, 1H), 7.40 (d,  $J = 8.2$  Hz, 1H), 7.36 – 7.31 (m, 1H), 7.24 – 7.18 (m, 1H), 2.47 (d,  $J = 3.3$  Hz, 3H).

**$^{13}\text{C}$  NMR** (101 MHz,  $\text{CDCl}_3$ )  $\delta$  136.3, 128.3, 124.8, 120.4, 119.7, 118.7, 114.2 (d,  $J = 27.1$  Hz), 111.4, 9.2 (d,  $J = 8.0$  Hz).

**$^{19}\text{F}$  NMR** (377 MHz,  $\text{CDCl}_3$ )  $\delta$  -117.22 to -118.24 (m, 2F), -121.40 to -122.55 (m, 2F), -122.60 to -123.62 (m, 1F), -131.61 to -132.65 (m, 2F), -137.95 to -138.99 (m, 2F), -141.18 to -142.18 (m, 1F), -180.64 to -180.95 (m, 1F).

**HRMS** (ESI,  $m/z$ ): Mass calcd. for  $\text{C}_{15}\text{H}_7\text{F}_{11}\text{N}^+$   $[\text{M}-\text{H}]^+$ , 410.0408; found: 410.0422.

### methyl 2,2-difluoro-2-(3-methyl-1H-indol-2-yl)acetate (3fa)

Yellow solid, 15.5 mg, 65% yield; m.p. 70-72 °C;

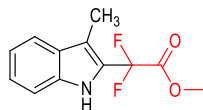

**$^1\text{H}$  NMR** (400 MHz,  $\text{CDCl}_3$ )  $\delta$  8.37 (s, 1H), 7.61 (d,  $J = 8.0$  Hz, 1H), 7.35 (d,  $J = 8.3$  Hz, 1H), 7.28 (t,  $J = 7.6$  Hz, 1H), 7.16 (ddd,  $J = 8.1, 6.9, 1.1$  Hz, 1H), 3.87 (s, 3H), 2.41 (t,  $J = 2.4$  Hz, 3H).

**$^{13}\text{C}$  NMR** (101 MHz,  $\text{CDCl}_3$ )  $\delta$  164.0 (t,  $J = 36.2$  Hz), 135.6, 128.5, 124.4, 123.2 (t,  $J = 29.8$  Hz), 120.2, 119.8, 114.0 (q,  $J = 39.8$  Hz, 28.9 Hz), 111.5, 109.0, 53.9, 8.5.

**$^{19}\text{F}$  NMR** (376 MHz,  $\text{CDCl}_3$ )  $\delta$  -101.50 (s, 2F)

**HRMS** (ESI,  $m/z$ ): Mass calcd. for  $\text{C}_{12}\text{H}_{10}\text{F}_2\text{NO}_2^+$   $[\text{M}-\text{H}]^+$ , 238.0685; found: 238.0677.

### (S)-5-((3-(2-(dimethylamino)ethyl)-2-(perfluorobutyl)-1H-indol-5-yl)methyl)oxazolidin-2-one (5a)

Yellow solid, 24.3 mg, 48% yield; m.p. 72-74 °C;

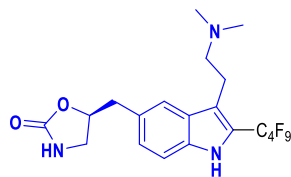

**$^1\text{H}$  NMR** (400 MHz, DMSO)  $\delta$  12.11 (s, 1H), 7.87 (s, 1H), 7.69 (s, 1H), 7.45 (d,  $J = 8.4$  Hz, 1H), 7.25 (dd,  $J = 8.5, 1.5$  Hz, 1H), 4.30 (t,  $J = 8.2$  Hz, 1H), 4.18 – 4.12 (m, 1H), 3.21 (d,  $J = 4.9$  Hz, 4H), 2.90 (s, 6H), 2.52 (p,  $J = 1.8$  Hz, 2H).

**$^{13}\text{C}$  NMR** (101 MHz, DMSO)  $\delta$  159.2, 136.0, 128.8, 127.2, 127.0, 120.6, 119.7 (t,  $J = 28.3$  Hz), 114.1, 112.9, 68.5, 57.3, 55.4, 53.2, 42.9, 19.9.

**<sup>19</sup>F NMR** (376 MHz, DMSO) δ -80.47 (t, *J* = 9.8 Hz, 3F), -106.60 (q, *J* = 12.2 Hz, 2F), -122.33 (q, *J* = 9.5 Hz, 2F), -125.53 (t, *J* = 12.3 Hz, 2F).

**HRMS** (ESI, *m/z*): Mass calcd. for C<sub>20</sub>H<sub>21</sub>F<sub>9</sub>N<sub>3</sub>O<sub>2</sub><sup>+</sup>, [M+H]<sup>+</sup>, 506.1485; found: 506.1485.

***N*-2-(5-methoxy-2-(perfluorobutyl)-1*H*-indol-3-yl)ethylacetamide (5b)**

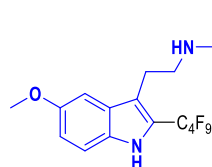

White solid, 6.3 mg, 60% yield; m.p. 66-68 °C;

**<sup>1</sup>H NMR** (400 MHz, CDCl<sub>3</sub>) δ 8.71 (s, 1H), 7.32 (d, *J* = 8.9 Hz, 1H), 7.18 (d, *J* = 2.4 Hz, 1H), 7.00 (dd, *J* = 8.9, 2.4 Hz, 1H), 5.67 (d, *J* = 7.3 Hz, 1H), 3.87 (s, 3H), 3.56 (q, *J* = 6.7 Hz, 2H), 3.07 (t, *J* = 7.0 Hz, 2H), 1.95 (s, 3H).

**<sup>13</sup>C NMR** (101 MHz, CDCl<sub>3</sub>) δ 170.3, 154.8, 131.3, 128.1, 120.3, 117.3 (d, *J* = 3.4 Hz), 116.6, 112.8, 100.6, 55.8, 40.2, 24.3, 23.3.

**<sup>19</sup>F NMR** (376 MHz, CDCl<sub>3</sub>) δ -80.94 (t, *J* = 9.8 Hz, 3F), -107.48 to -107.57 (m, 2F), -122.81 (q, *J* = 11.0, 10.4 Hz, 2F), -125.90 (t, *J* = 13.4 Hz, 2F).

**HRMS** (ESI, *m/z*): Mass calcd. for C<sub>17</sub>H<sub>15</sub>F<sub>9</sub>N<sub>2</sub>O<sub>2</sub>Na<sup>+</sup>, [M+Na]<sup>+</sup>, 473.0882; found: 473.0874.

**3,7-dimethyloct-6-en-1-yl-2-(2-(perfluorobutyl)-1*H*-indol-3-yl)acetate (5c)**

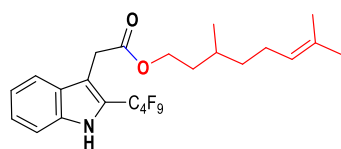

Colorless oil, 28.2 mg, 53% yield;

**<sup>1</sup>H NMR** (400 MHz, CDCl<sub>3</sub>) δ 8.41 (s, 1H), 7.67 (d, *J* = 8.0 Hz, 1H), 7.40 (d, *J* = 8.2 Hz, 1H), 7.34 (t, *J* = 7.6 Hz, 1H), 7.25 – 7.17 (m, 1H), 5.09 – 4.99 (m, 1H), 4.18 – 4.07 (m, 2H), 3.90 (s, 2H), 1.99 –

1.81 (m, 1H), 1.68 (d, *J* = 6.8 Hz, 3H), 1.59 (d, *J* = 6.1 Hz, 3H), 1.44 – 1.26 (m, 3H), 1.26 – 0.84 (m, 3H), 0.82 (t, *J* = 6.6 Hz, 3H).

**<sup>13</sup>C NMR** (101 MHz, CDCl<sub>3</sub>) δ 170.6 (d, *J* = 4.9 Hz), 135.9, 131.3, 125.3 (d, *J* = 3.9 Hz), 124.6, 121.0, 120.4 (d, *J* = 6.6 Hz), 118.6, 111.7 (d, *J* = 2.9 Hz), 63.6, 63.2 (d, *J* = 5.7 Hz), 36.9, 35.3, 30.1, 29.6 (d, *J* = 14.4 Hz), 29.4, 25.7, 25.4, 19.2, 17.6.

**<sup>19</sup>F NMR** (377 MHz, CDCl<sub>3</sub>) δ -80.90 to -81.04 (m, 3F), -108.17 to -108.34 (m, 2F), -122.78 to -122.91 (m, 2F), -125.76 to -125.98 (m, 2F).

**HRMS** (ESI, *m/z*): Mass calcd. for C<sub>24</sub>H<sub>26</sub>F<sub>9</sub>NO<sub>2</sub>Na<sup>+</sup>, [M+Na]<sup>+</sup>, 554.1712; found: 554.1710.

**((3*aS*,5*aS*,5*aR*,8*aR*,8*bS*)-2,2,7,7-tetramethyltetrahydro-5*H*-bis([1,3]dioxolo)[4,5-*b*:4',5'-*d*]pyran-5-yl)methyl-2-(2-(perfluorobutyl)-1*H*-indol-3-yl)acetate (5d)**

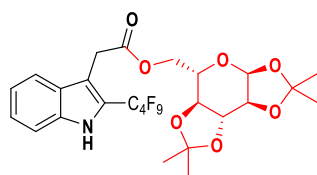

Colorless oil, 23.5 mg, 37% yield;

**<sup>1</sup>H NMR** (400 MHz, CDCl<sub>3</sub>) δ 8.51 (s, 1H), 7.67 (d, *J* = 8.2 Hz, 1H), 7.45 – 7.38 (m, 1H), 7.39 – 7.31 (m, 1H), 7.21 (ddd, *J* = 8.1, 6.9, 1.1 Hz, 1H), 5.71 (d, *J* = 3.6 Hz, 1H), 5.32 – 5.26 (m, 1H), 4.41 (d, *J* = 3.6 Hz, 1H), 4.14 (dd, *J* = 8.0, 3.1 Hz, 1H), 3.98 – 3.90 (m, 3H), 3.93 –

3.82 (m, 2H), 1.49 (s, 3H), 1.37 (s, 3H), 1.27 (s, 3H), 1.22 (s, 3H).

**<sup>13</sup>C NMR** (101 MHz, CDCl<sub>3</sub>) δ 167.0, 133.8, 125.3, 123.3, 119.0, 118.0, 110.3 (t, *J* = 2.7 Hz), 110.2, 109.7, 107.2, 102.9, 81.0, 77.8, 74.5, 70.1, 64.9, 27.9, 27.6, 24.6, 24.6, 24.0, 22.7.

**<sup>19</sup>F NMR** (377 MHz, CDCl<sub>3</sub>) δ -80.91 (t, *J* = 9.8 Hz, 3F), -108.19 (dt, *J* = 41.6, 13.0 Hz, 2F), -122.71 to -122.86 (m, 2F), -125.74 to -125.88 (m, 2F).

**HRMS** (ESI, *m/z*): Mass calcd. for C<sub>26</sub>H<sub>26</sub>F<sub>9</sub>NO<sub>7</sub>Na<sup>+</sup>, [M+Na]<sup>+</sup>, 658.1458; found: 658.1456.

**(3*S*,8*S*,9*S*,10*R*,13*R*,14*S*,17*R*)-10,13-dimethyl-17-((*R*)-6-methylheptan-2-yl)-2,3,4,7,8,9,10,11,12,13,14,15,16,17-tetradecahydro-1*H*-cyclopenta[*a*]phenanthren-3-yl 2-(2-(perfluorobutyl)-1**

### *H*-indol-3-yl)acetate (5e)

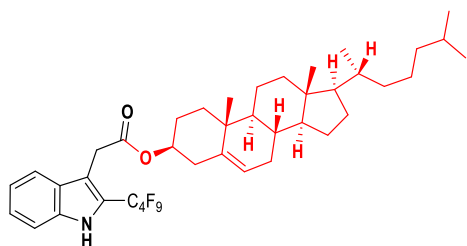

Colorless oil, 31.2 mg, 41 % yield;

**<sup>1</sup>H NMR** (400 MHz, CDCl<sub>3</sub>) δ 8.47 (s, 1H), 7.68 (d, *J* = 8.1 Hz, 1H), 7.39 (d, *J* = 8.3 Hz, 1H), 7.32 (t, *J* = 7.6 Hz, 1H), 7.20 (t, *J* = 7.4 Hz, 1H), 5.42 – 5.30 (m, 1H), 4.71 – 4.57 (m, 1H), 3.89 (d, *J* = 11.3 Hz, 2H), 2.28 (d, *J* = 5.4 Hz, 1H), 2.07 – 1.89 (m, 3H), 1.82 (d, *J* = 11.0 Hz, 3H), 1.58 – 1.42 (m, 6H), 1.36 – 1.21 (m, 6H), 1.19 – 1.02 (m,

9H), 0.99 (s, 3H), 0.91 (d, *J* = 6.4 Hz, 3H), 0.86 (dd, *J* = 6.6, 1.8 Hz, 6H), 0.67 (s, 3H).

**<sup>13</sup>C NMR** (101 MHz, CDCl<sub>3</sub>) δ 170.0, 139.6, 136.0, 127.7, 125.2, 122.7, 121.0, 120.5, 113.4 (t, *J* = 2.8 Hz), 111.7, 74.8, 71.0, 56.7, 56.1, 50.0, 42.3, 39.7, 39.5, 37.9, 36.9, 36.6, 36.2, 35.8, 31.9 (d, *J* = 4.5 Hz), 30.4, 28.2, 28.0, 27.6, 24.3, 23.8, 22.8, 22.6, 21.0, 19.3, 18.7, 11.8.

**<sup>19</sup>F NMR** (377 MHz, CDCl<sub>3</sub>) δ -80.87 – -81.11 (m, 3F), -108.28 (t, *J* = 13.1 Hz, 2F), -122.57 to -123.17 (m, 2F), -125.64 to -126.00 (m, 2F).

**HRMS** (ESI, *m/z*): Mass calcd. for C<sub>41</sub>H<sub>52</sub>F<sub>9</sub>NO<sub>2</sub>Na<sup>+</sup>, [M+Na]<sup>+</sup>, 784.3747; found: 784.3740.

### 3-(perfluorobutyl)-1*H*-indole (7b)

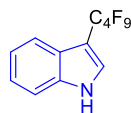

Colorless oil, 8.2 mg, 25% yield;

**<sup>1</sup>H NMR** (400 MHz, CDCl<sub>3</sub>) δ 8.45 (s, 1H), 7.71 (d, *J* = 8.0 Hz, 1H), 7.46 (d, *J* = 8.4 Hz, 1H), 7.35 (t, *J* = 7.7 Hz, 1H), 7.21 (t, *J* = 7.4 Hz, 1H), 6.98 (s, 1H), 1.58 (s, 3H).

**<sup>13</sup>C NMR** (151 MHz, CDCl<sub>3</sub>) δ 136.6, 126.9, 124.9, 124.0, 122.1, 121.2, 111.7, 106.5 (t, *J* = 5.0 Hz).

**<sup>19</sup>F NMR** (376 MHz, CDCl<sub>3</sub>) δ -80.97 (t, *J* = 9.7 Hz, 3F), -108.69 to -108.81 (m, 2F), -123.04 to -123.15 (m, 2F), -125.68 to -125.78 (m, 2F).

**HRMS** (ESI, *m/z*): Mass calcd. for C<sub>12</sub>H<sub>5</sub>F<sub>9</sub>N<sup>+</sup> [M-H]<sup>+</sup>, 334.0284; found: 334.0284.

### tert-butyl 3-(perfluorobutyl)-1*H*-indole-1-carboxylate (7c)

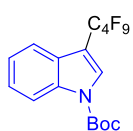

Colorless oil, 9.1 mg, 21% yield;

**<sup>1</sup>H NMR** (400 MHz, CDCl<sub>3</sub>) δ 8.19 (d, *J* = 8.4 Hz, 1H), 7.64 (d, *J* = 7.6 Hz, 1H), 7.45 (d, *J* = 7.6 Hz, 1H), 7.30 (t, *J* = 7.4 Hz, 1H), 7.19 (s, 1H), 1.66 (s, 9H).

**<sup>13</sup>C NMR** (101 MHz, CDCl<sub>3</sub>) δ 148.9, 138.3, 127.2, 126.6, 125.3 (d, *J* = 37.6 Hz), 123.5, 122.1, 115.8, 85.6, 28.1, 27.8.

**<sup>19</sup>F NMR** (377 MHz, CDCl<sub>3</sub>) δ -80.78 to -80.90 (m, 3F), -99.93 to -100.17 (m, 2F), -118.79 to -119.02 (m, 2F), -125.21 to -125.43 (m, 2F).

**HRMS** (ESI, *m/z*): Mass calcd. for C<sub>17</sub>H<sub>14</sub>F<sub>9</sub>NO<sub>2</sub>Na<sup>+</sup> [M+Na]<sup>+</sup>, 458.0773; found: 458.0762.

### 3-methyl-2-(perfluorobutyl)benzofuran (7d)

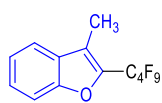

Colorless oil, 20.3 mg, 58% yield;

**<sup>1</sup>H NMR** (400 MHz, CDCl<sub>3</sub>) δ 7.62 (d, *J* = 7.8 Hz, 1H), 7.53 (d, *J* = 8.3 Hz, 1H), 7.47 – 7.41 (m, 1H), 7.36 – 7.31 (m, 1H), 2.41 (t, *J* = 2.5 Hz, 3H).

**<sup>13</sup>C NMR** (101 MHz, CDCl<sub>3</sub>) δ 154.7, 128.6, 127.0, 124.3, 123.4, 121.2 (t, *J* = 1.7 Hz), 120.6, 111.9, 7.8.

**<sup>19</sup>F NMR** (377 MHz, CDCl<sub>3</sub>) δ -80.93 to -81.04 (m, 3F), -111.43 to -111.56 (m, 2F), -123.57 to -

123.76 (m, 2F), -126.22 to -126.35 (m, 2F).

**HRMS** (APCI, m/z): Mass calcd. for C<sub>13</sub>H<sub>8</sub>F<sub>9</sub>O<sup>+</sup> [M+H]<sup>+</sup>, 351.0426; found: 351.0423.

### 5-bromo-3-methyl-2-(perfluorobutyl)benzofuran (7e)

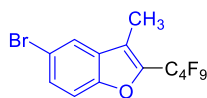

Colorless oil, 8.5 mg, 21% yield;

**<sup>1</sup>H NMR** (400 MHz, CDCl<sub>3</sub>) δ 7.75 (d, *J* = 2.0 Hz, 1H), 7.53 (dd, *J* = 8.8, 2.0 Hz, 1H), 7.40 (d, *J* = 8.7 Hz, 1H), 2.38 (t, *J* = 2.5 Hz, 3H).

**<sup>13</sup>C NMR** (101 MHz, CDCl<sub>3</sub>) δ 153.4, 130.5, 130.1, 123.4, 120.6 (t, *J* = 2.1 Hz), 116.6, 113.5, 7.7.

**<sup>19</sup>F NMR** (377 MHz, CDCl<sub>3</sub>) δ -80.86 to -81.07 (m), -111.67 to -111.81 (m), -123.60 to -123.78 (m), -126.24 to -126.38 (m).

**HRMS** (APCI, m/z): Mass calcd. for C<sub>13</sub>H<sub>7</sub>F<sub>9</sub>BrO<sup>+</sup> [M+H]<sup>+</sup>, 428.9531; found: 428.9527.

### 3-methyl-2-(perfluorobutyl)benzo[*b*]thiophene (7f)

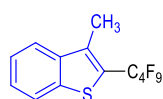

colorless oil, 7.3 mg, 20 % yield;

**<sup>1</sup>H NMR** (400 MHz, CDCl<sub>3</sub>) δ 7.82 – 7.72 (m, 1H), 7.44 – 7.36 (m, 1H), 2.49 (t, *J* = 2.1 Hz, 2H).

**<sup>13</sup>C NMR** (101 MHz, CDCl<sub>3</sub>) δ 139.8, 139.5, 136.7 (t, *J* = 4.1 Hz), 129.8, 126.6, 124.8, 123.1, 12.4, 12.5 (t, *J* = 2.6 Hz).

**<sup>19</sup>F NMR** (377 MHz, CDCl<sub>3</sub>) δ -80.94 (t, *J* = 10.0 Hz, 3F), -100.41 to -100.57 (m, 2F), -121.48 to -121.67 (m, 2F), -125.67 to -125.83 (m, 2F).

**HRMS** (ESI, m/z): Mass calcd. for C<sub>13</sub>H<sub>8</sub>F<sub>9</sub>S<sup>+</sup> [M+H]<sup>+</sup>, 367.0208; found: 367.0209.

### 5-chloro-3-methyl-2-(perfluorobutyl)benzo[*b*]thiophene (7g)

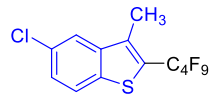

White solid, 7.6 mg, 19% yield; m.p. 69-71°C;

**<sup>1</sup>H NMR** (400 MHz, CDCl<sub>3</sub>) δ 7.82 – 7.74 (m, 2H), 7.44 (dd, *J* = 8.6, 2.0 Hz, 1H), 2.53 (m, *J* = 2.0, 0.9 Hz, 3H).

**<sup>13</sup>C NMR** (101 MHz, CDCl<sub>3</sub>) δ 141.0, 137.5 (t, *J* = 1.0 Hz), 136.0 (t, *J* = 3.9 Hz), 131.4, 127.2, 123.5, 122.9, 12.5 (t, *J* = 3.0 Hz).

**<sup>19</sup>F NMR** (377 MHz, CDCl<sub>3</sub>) δ -80.88 to -81.02 (m), -100.73 to -100.90 (m), -121.51 to -121.67 (m), -125.67 to -125.85 (m).

**HRMS** (APCI, m/z): Mass calcd. for C<sub>13</sub>H<sub>7</sub>F<sub>9</sub>ClS<sup>+</sup> [M+H]<sup>+</sup>, 400.9808; found: 400.9809.

### ethyl 3-(perfluorobutyl)-1*H*-pyrrole-2-carboxylate (7h)

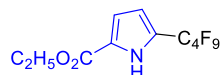

White solid, 26.4 mg, 74% yield; m.p. = 67-69°C;

**<sup>1</sup>H NMR** (400 MHz, CDCl<sub>3</sub>) δ 9.94 (s, 1H), 6.93 (ddt, *J* = 4.0, 2.6, 1.3 Hz, 1H), 6.62 (td, *J* = 2.8, 1.3 Hz, 1H), 4.37 (q, *J* = 7.1 Hz, 2H), 1.38 (t, *J* = 7.1 Hz, 3H).

**<sup>13</sup>C NMR** (101 MHz, CDCl<sub>3</sub>) δ 160.6, 126.3, 122.6 (t, *J* = 30.7 Hz), 115.2, 112.9 (t, *J* = 4.1 Hz), 61.2, 14.3.

**<sup>19</sup>F NMR** (377 MHz, CDCl<sub>3</sub>) δ -80.95 to -81.08 (m), -108.74 to -108.87 (m), -123.18 to -123.32 (m), -125.70 to -125.84 (m).

**HRMS** (ESI, m/z): Mass calcd. for C<sub>11</sub>H<sub>7</sub>F<sub>9</sub>NO<sub>2</sub>, [M-H]<sup>+</sup>, 356.0339; found: 356.0339.

### tert-butyl 2-(perfluorobutyl)-1*H*-pyrrole-1-carboxylate (7i)

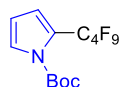

Colorless oil, 24 mg, 62% yield;

**<sup>1</sup>H NMR** (400 MHz, CDCl<sub>3</sub>) δ 7.52 (dd, *J* = 3.4, 1.9 Hz, 1H), 6.77 (ddt, *J* = 3.7, 1.8, 0.9 Hz, 1H), 6.25 (t, *J* = 3.4 Hz, 1H), 1.60 (s, 9H).

**<sup>13</sup>C NMR** (101 MHz, CDCl<sub>3</sub>) δ 147.5, 127.7, 120.2 (m), 109.8, 85.7, 29.7, 27.7.

**<sup>19</sup>F NMR** (377 MHz, CDCl<sub>3</sub>) δ -80.88 to -81.00 (m, 3F), -100.35 to -100.49 (m, 2F), -119.44 to -119.58 (m, 2F), -125.48 to -125.62 (m, 2F).

**HRMS** (ESI, *m/z*): Mass calcd. for C<sub>13</sub>H<sub>11</sub>F<sub>9</sub>NO<sub>2</sub>, [M-H]<sup>+</sup>, 384.0652; found: 384.0653.

**1-benzyl-2-(perfluorobutyl)-1*H*-pyrrole (7j)**

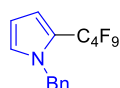

Colorless oil, 22.4 mg, 51% yield;

**<sup>1</sup>H NMR** (400 MHz, CDCl<sub>3</sub>) δ 7.36 – 7.26 (m, 3H), 7.10 – 7.03 (m, 2H), 6.74 (t, *J* = 2.3 Hz, 1H), 6.63 (d, *J* = 3.9 Hz, 1H), 6.22 (t, *J* = 3.4 Hz, 1H), 5.17 (s, 2H).

**<sup>13</sup>C NMR** (101 MHz, CDCl<sub>3</sub>) δ 137.2, 128.8, 127.9, 127.4 (t, *J* = 1.8 Hz), 126.9, 124.3, 114.5 (t, *J* = 6.0 Hz), 108.7, 52.1 (q, *J* = 3.3, 2.9 Hz).

**<sup>19</sup>F NMR** (377 MHz, CDCl<sub>3</sub>) δ -80.93 to -81.10 (m, 3F), -103.32 to -103.51 (m, 2F), -121.62 to -121.80 (m, 3F), -125.61 to -125.84 (m, 2F).

**HRMS** (ESI, *m/z*): Mass calcd. for C<sub>15</sub>H<sub>9</sub>F<sub>9</sub>N, [M-H]<sup>+</sup>, 374.0597; found: 374.0540.

## VIII. NMR spectra

### 3-methyl-2-(perfluorohexyl)-1*H*-indole (3a)

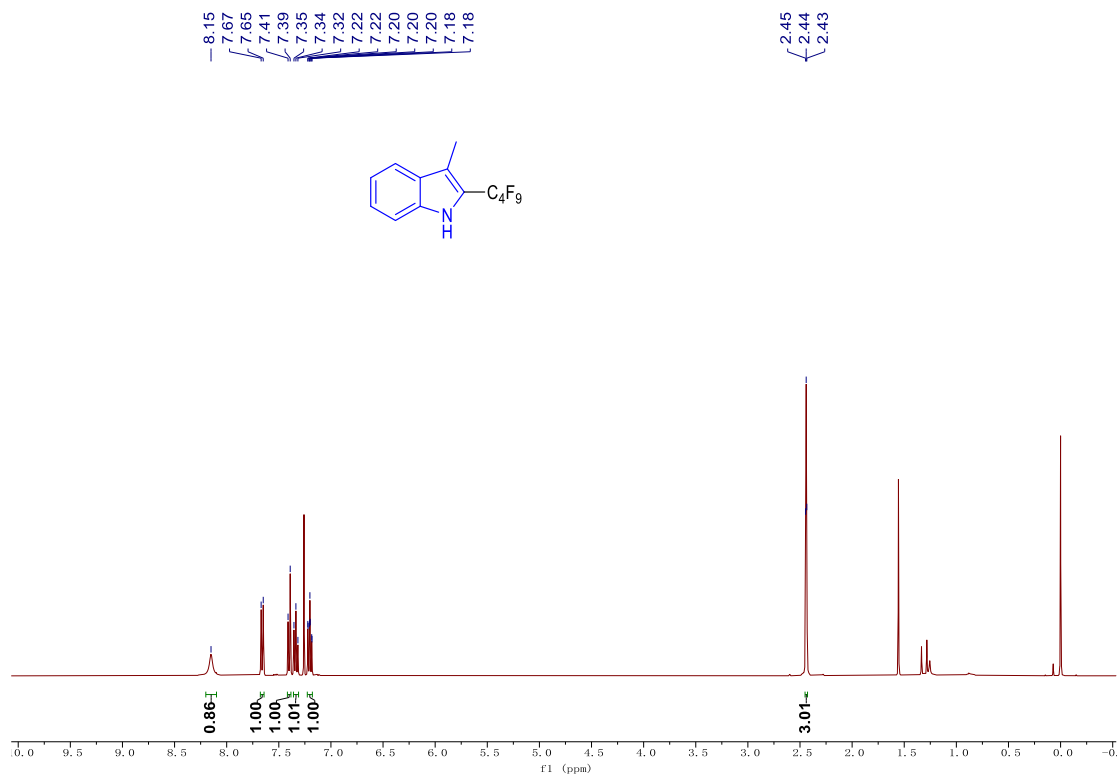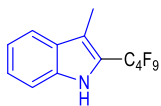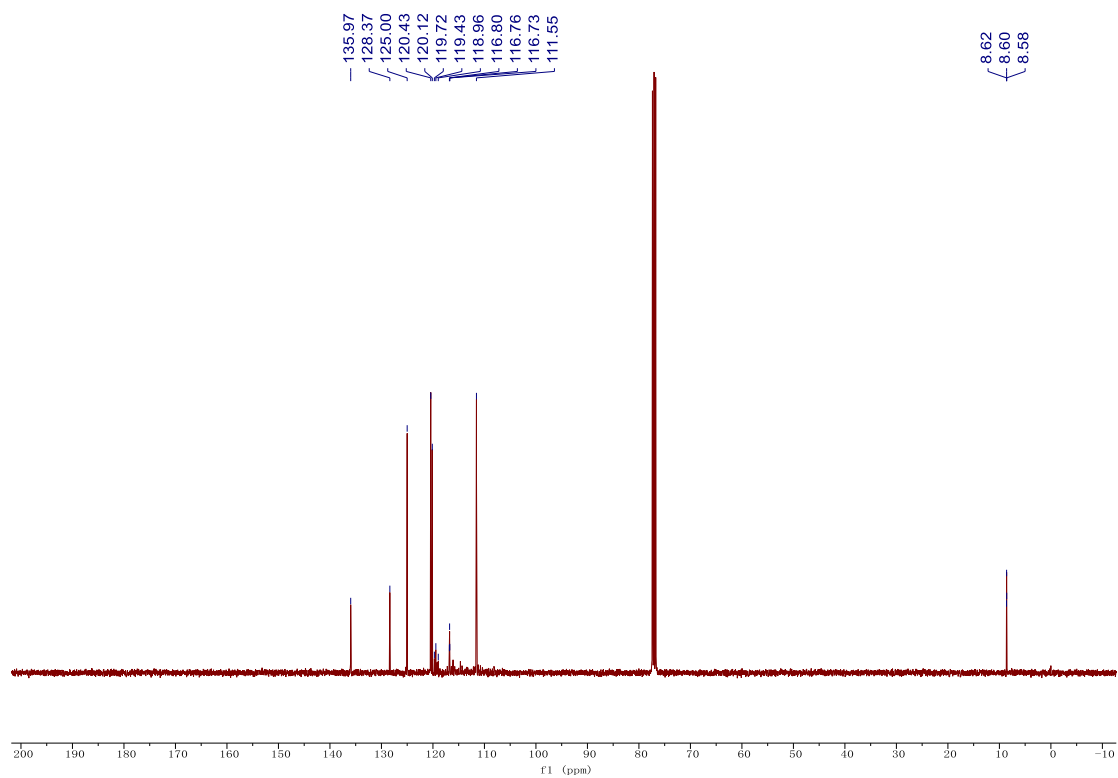

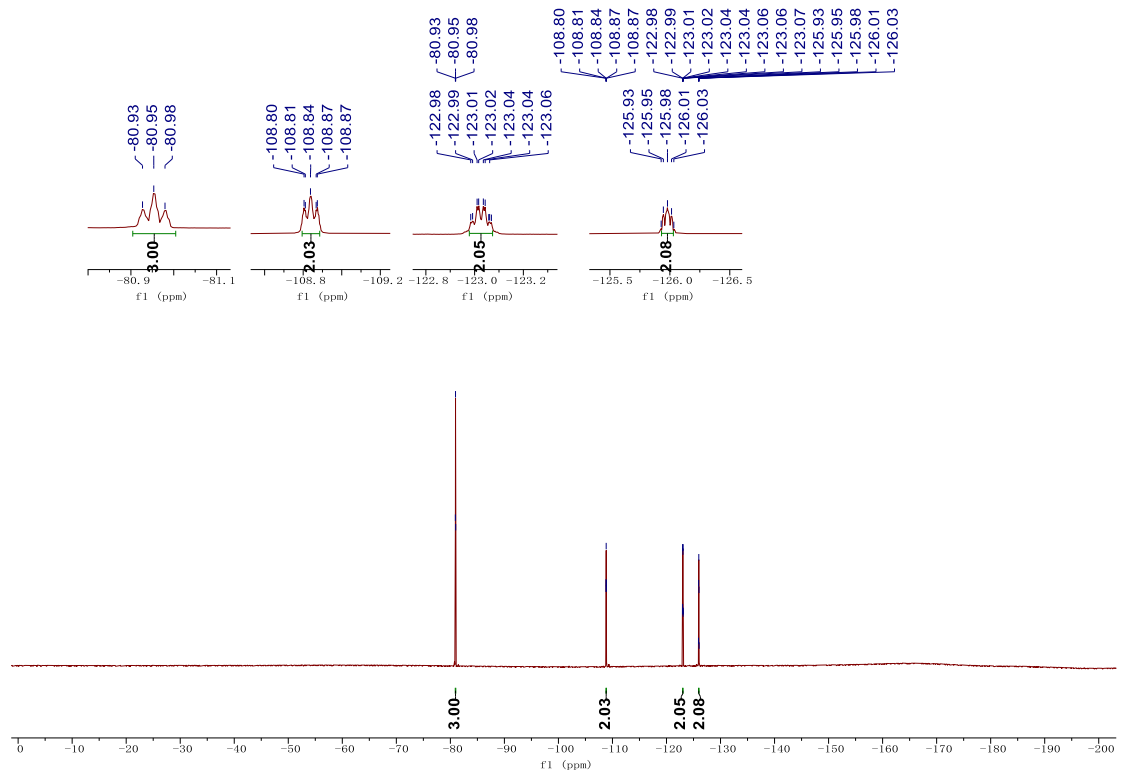

### 4-chloro-3-methyl-2-(perfluorobutyl)-1H-indole (3b)

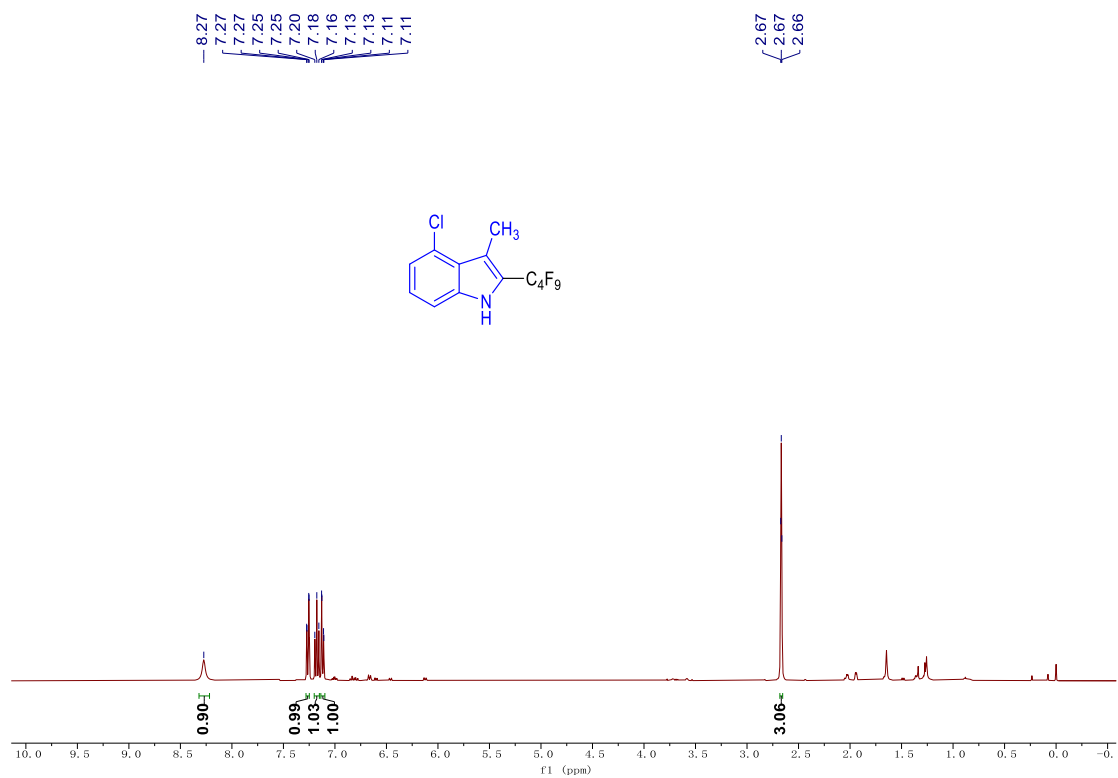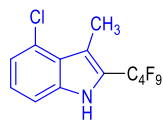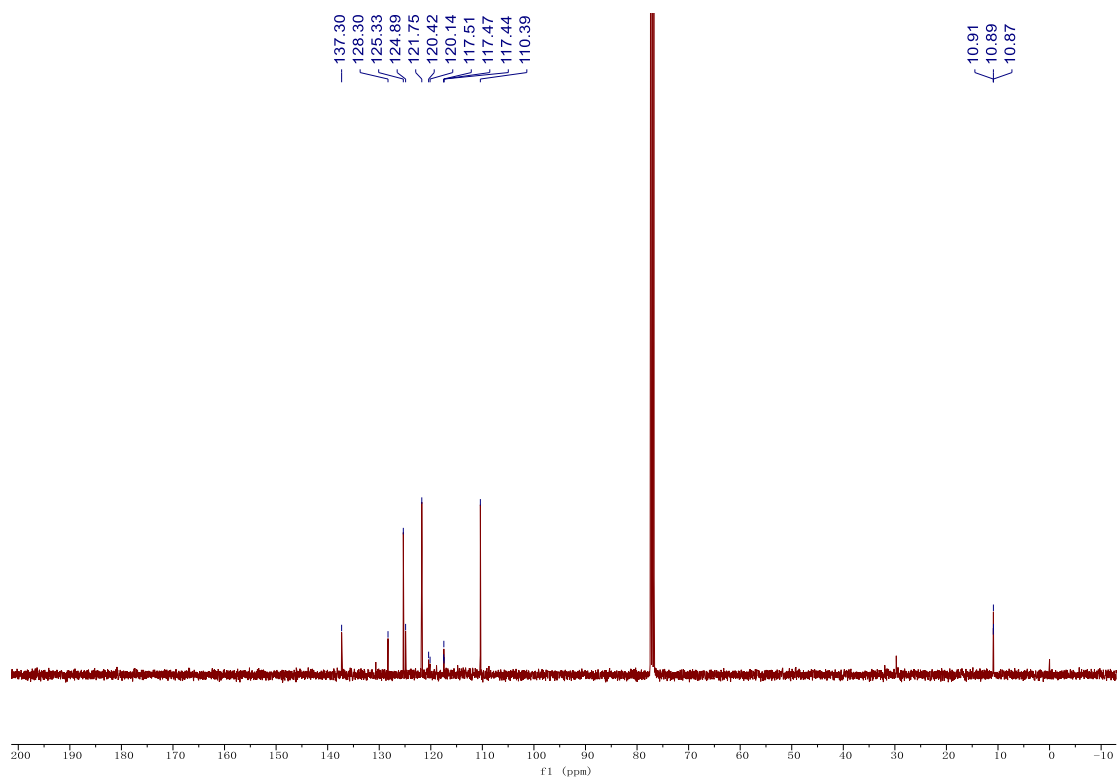



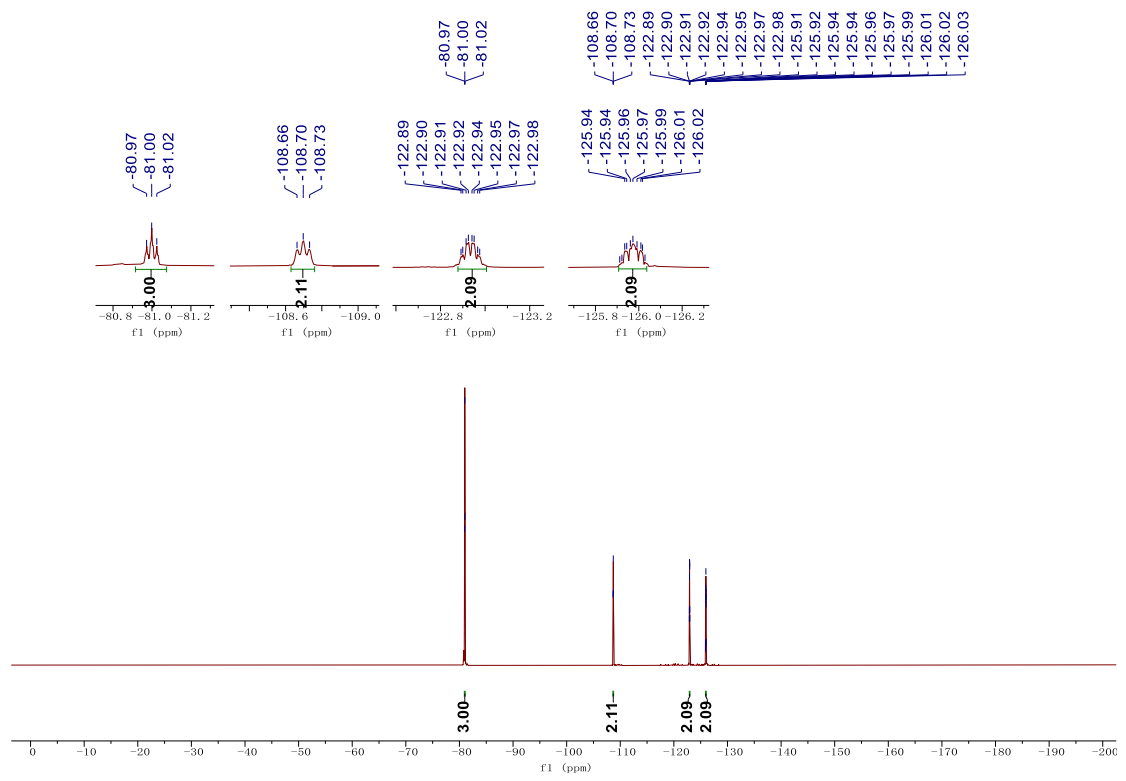

### 4-bromo-3-methyl-2-(perfluorobutyl)-1H-indole (3c)

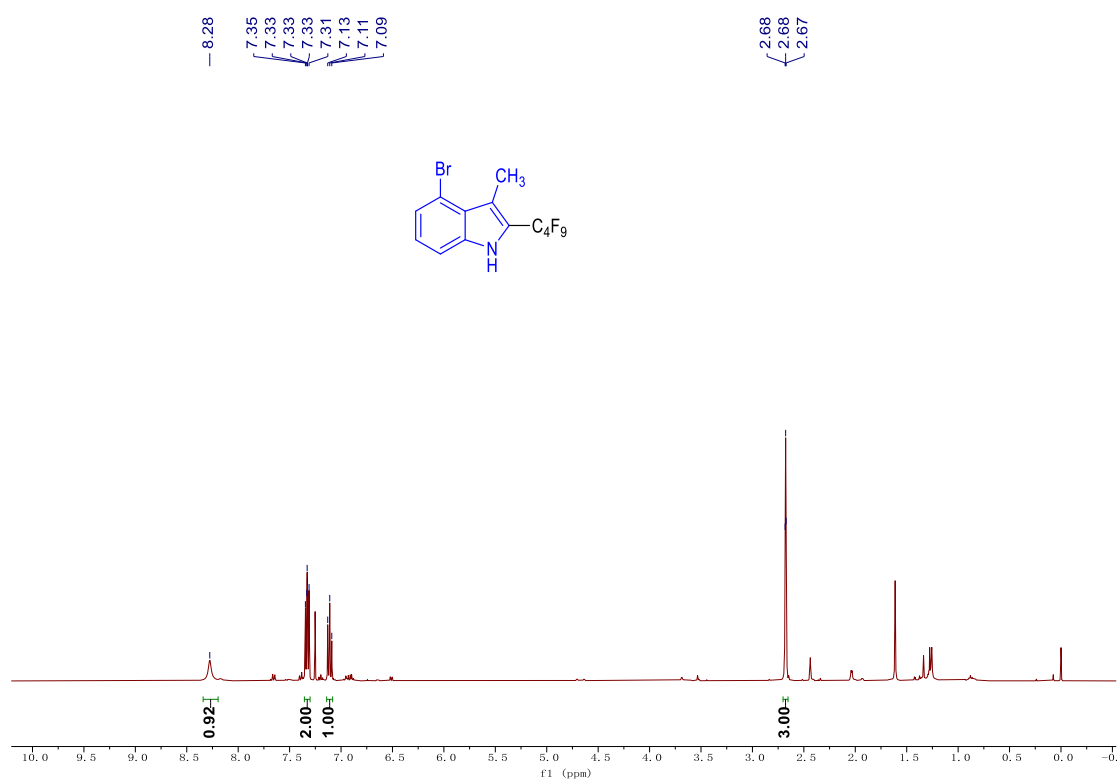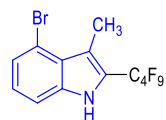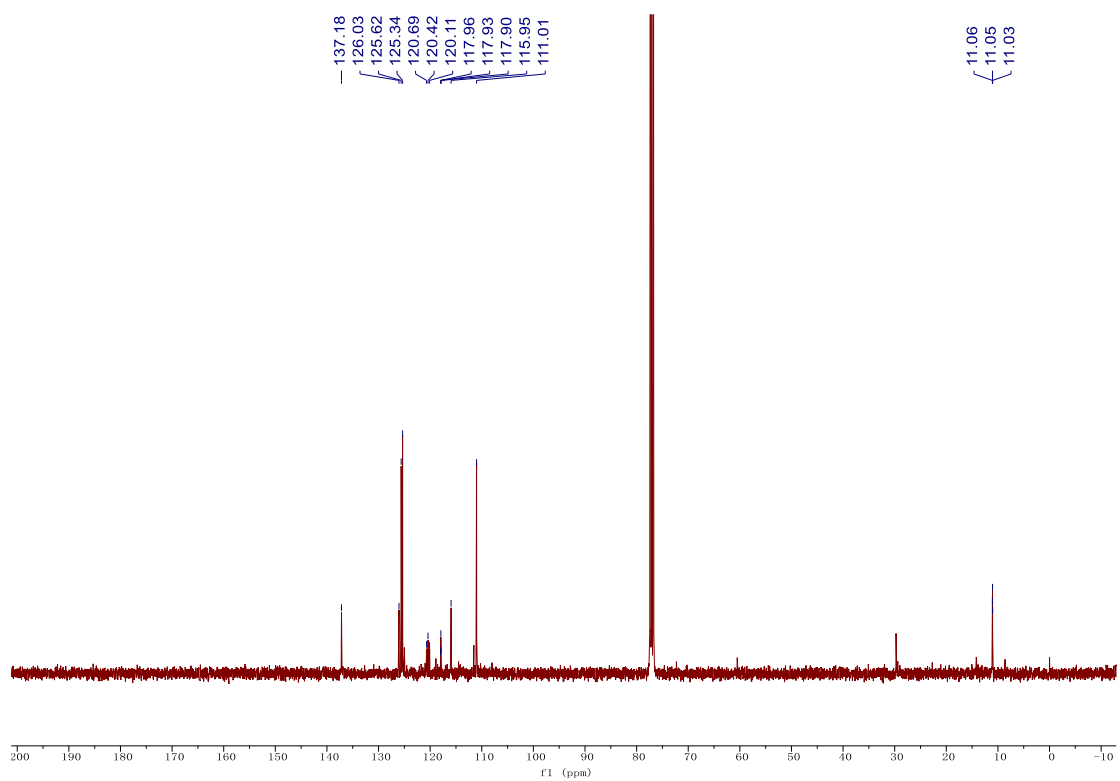

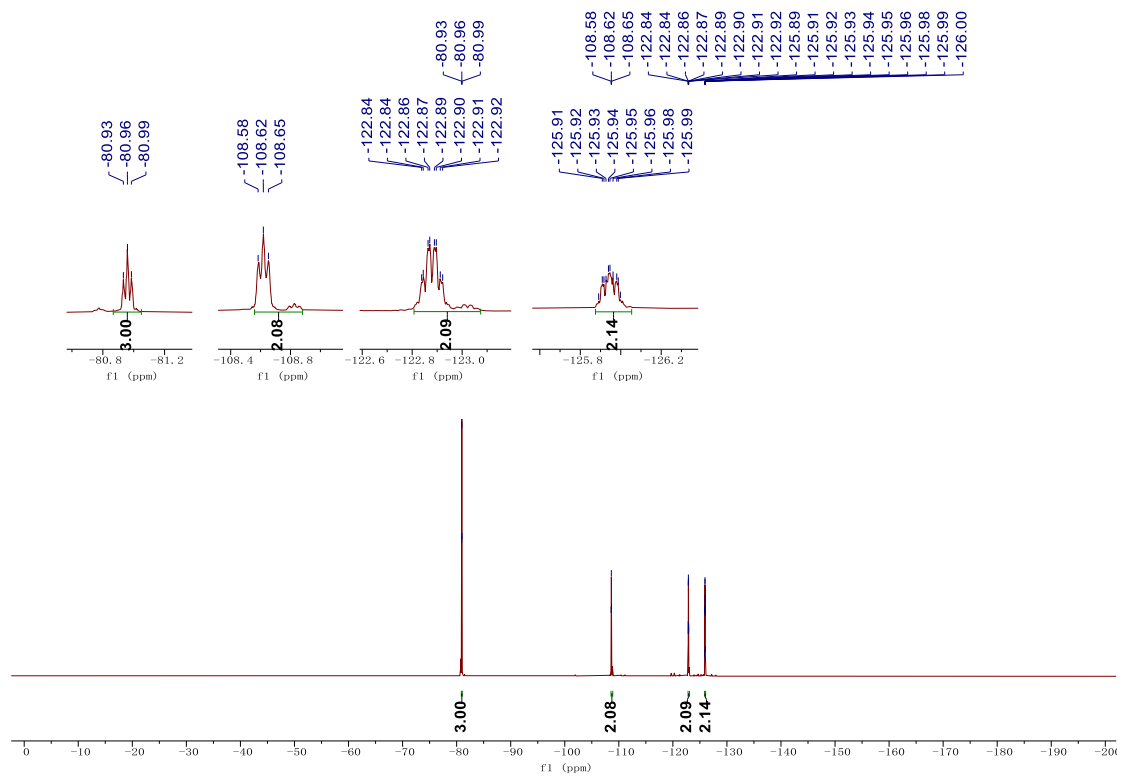

**4-(benzyloxy)-3-methyl-2-(perfluorobutyl)-1H-indole (3d)**

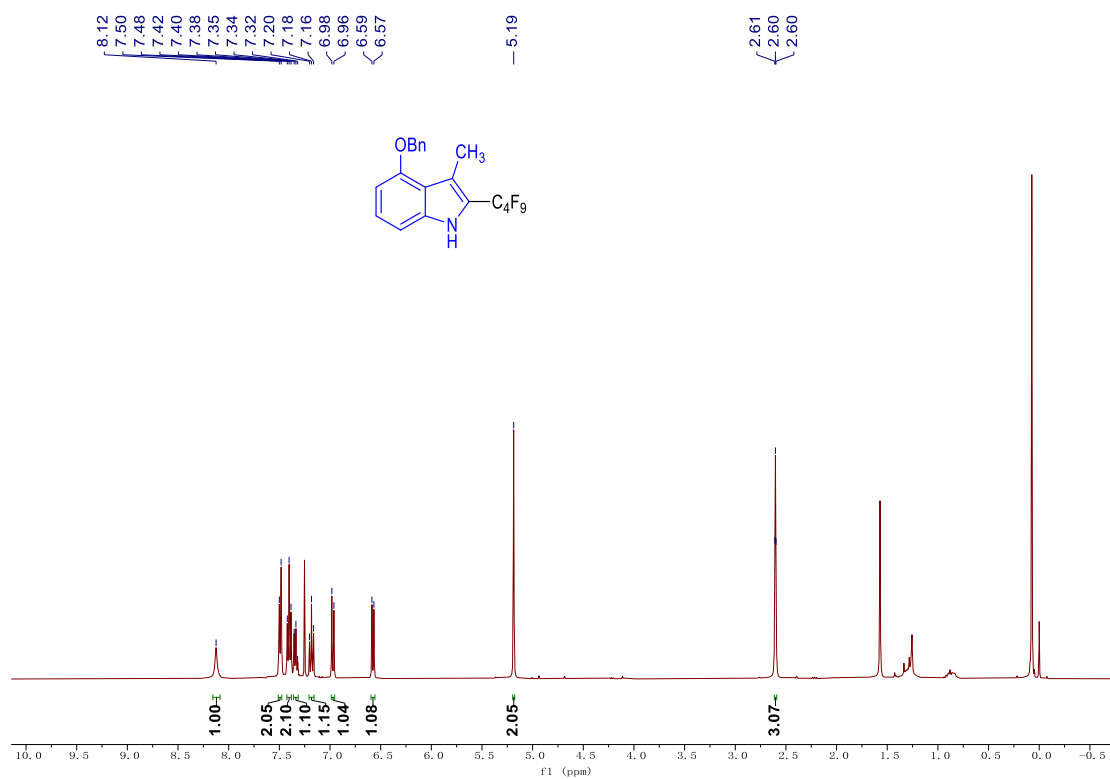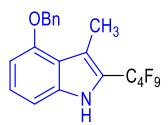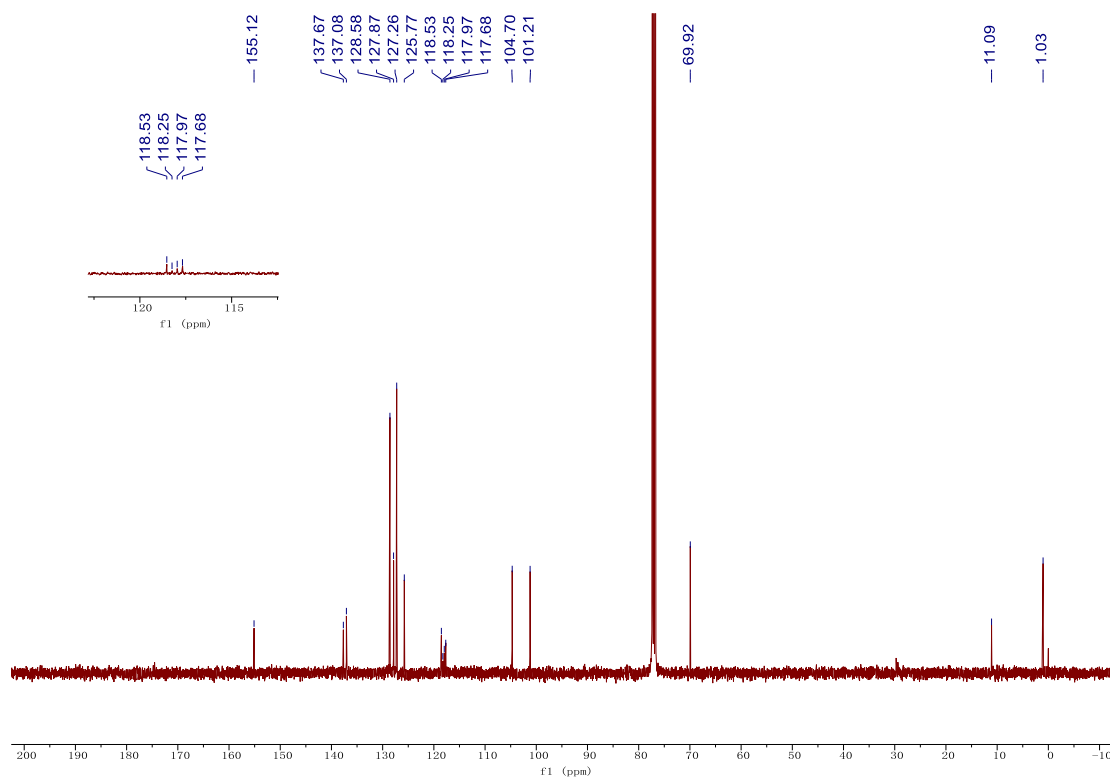

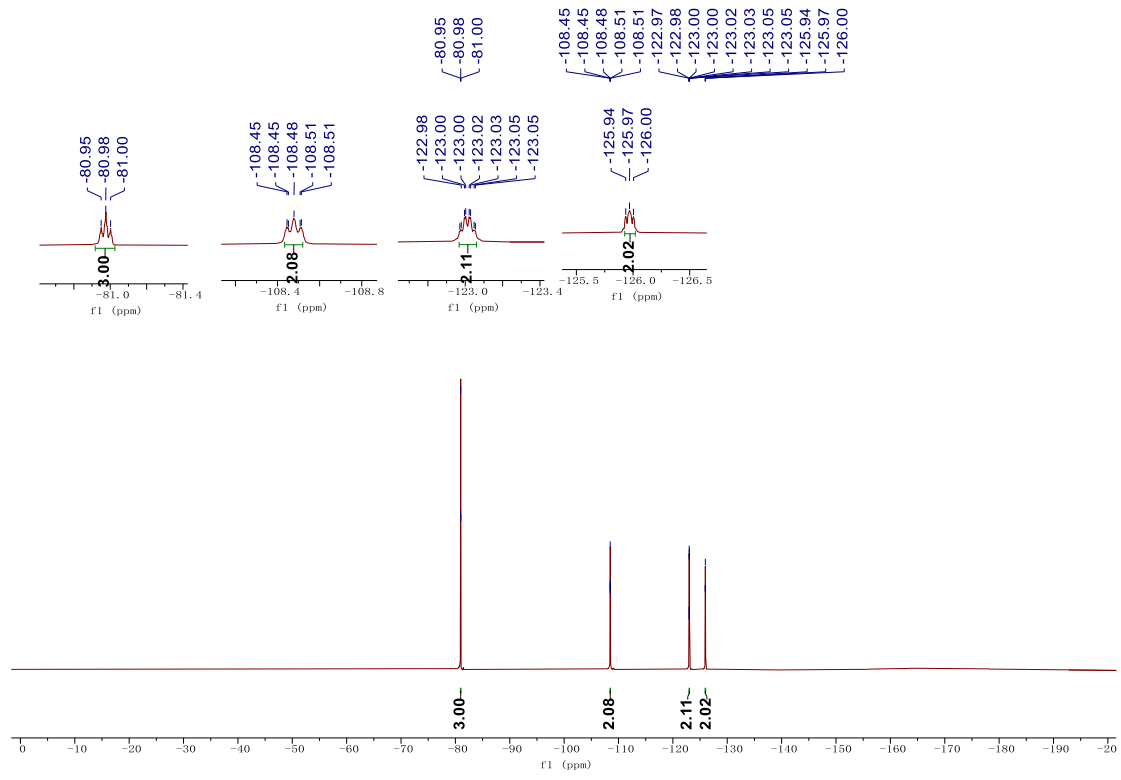

### 3,5-dimethyl-2-(perfluorobutyl)-1H-indole (3e)

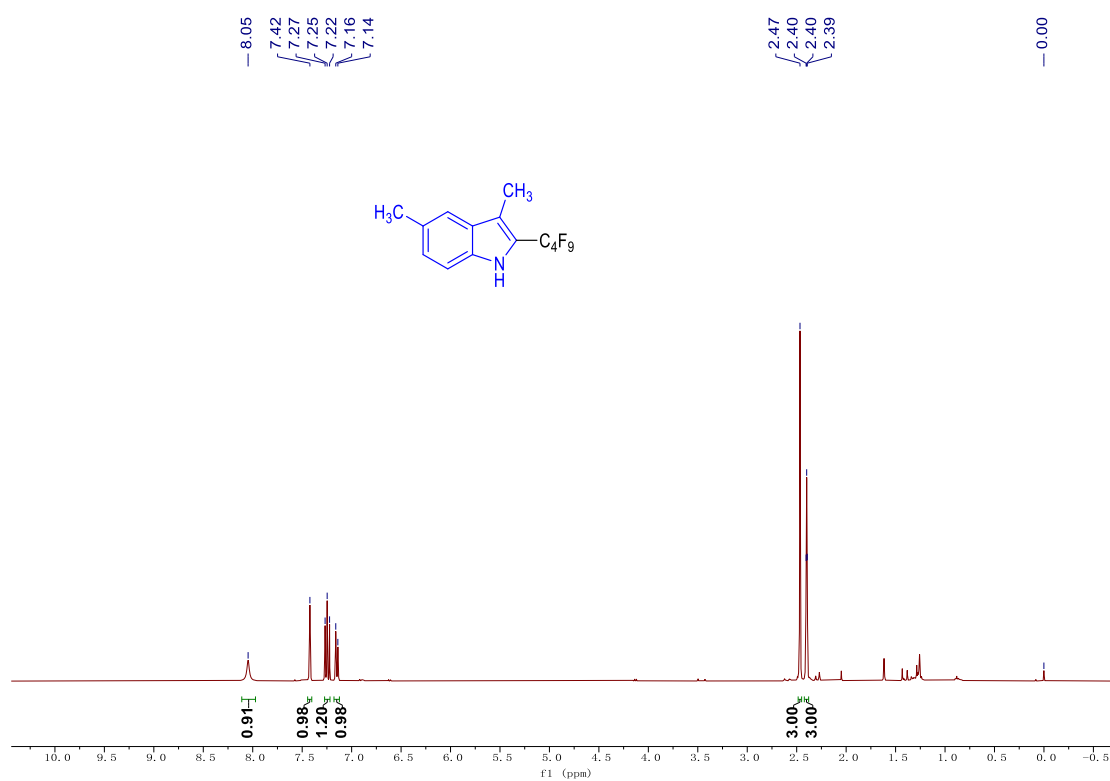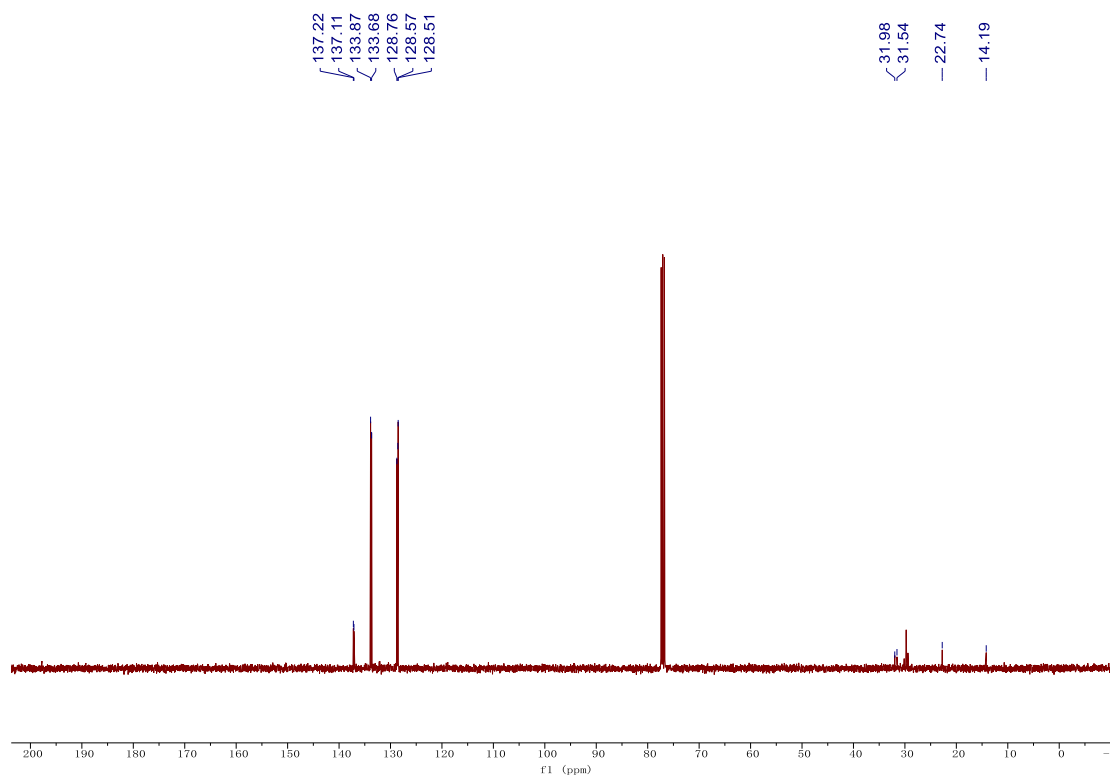

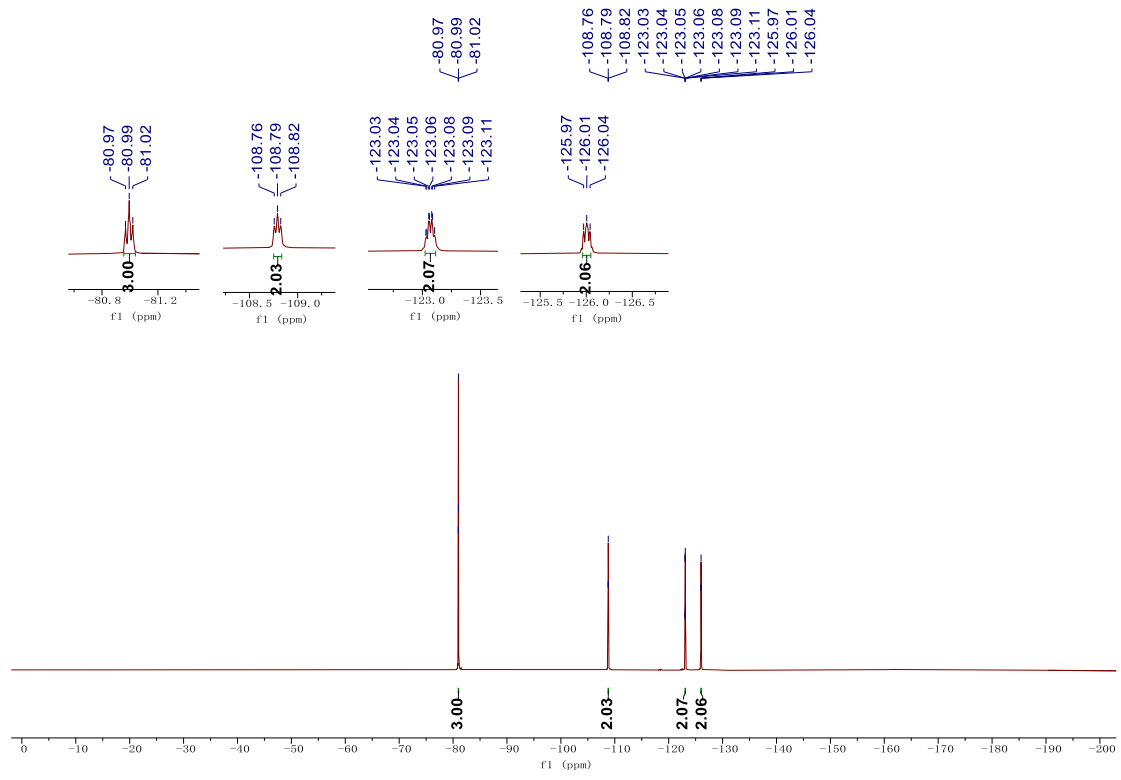

### 5-methoxy-3-methyl-2-(perfluorobutyl)-1H-indole (3f)

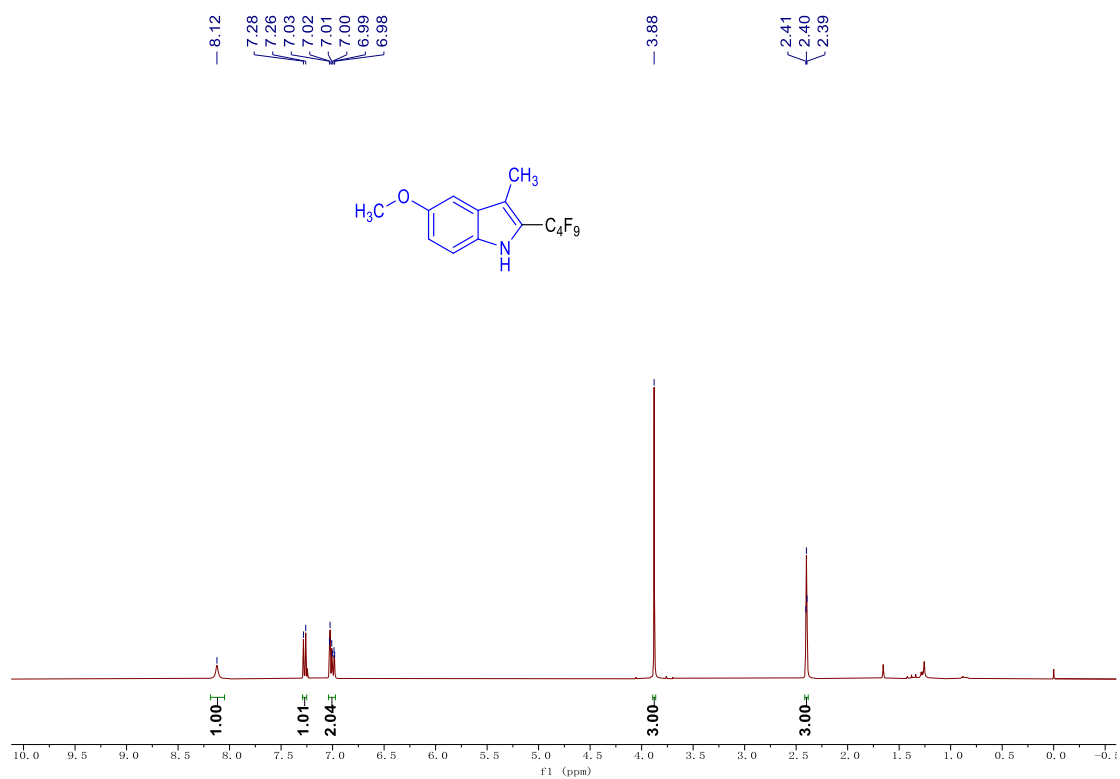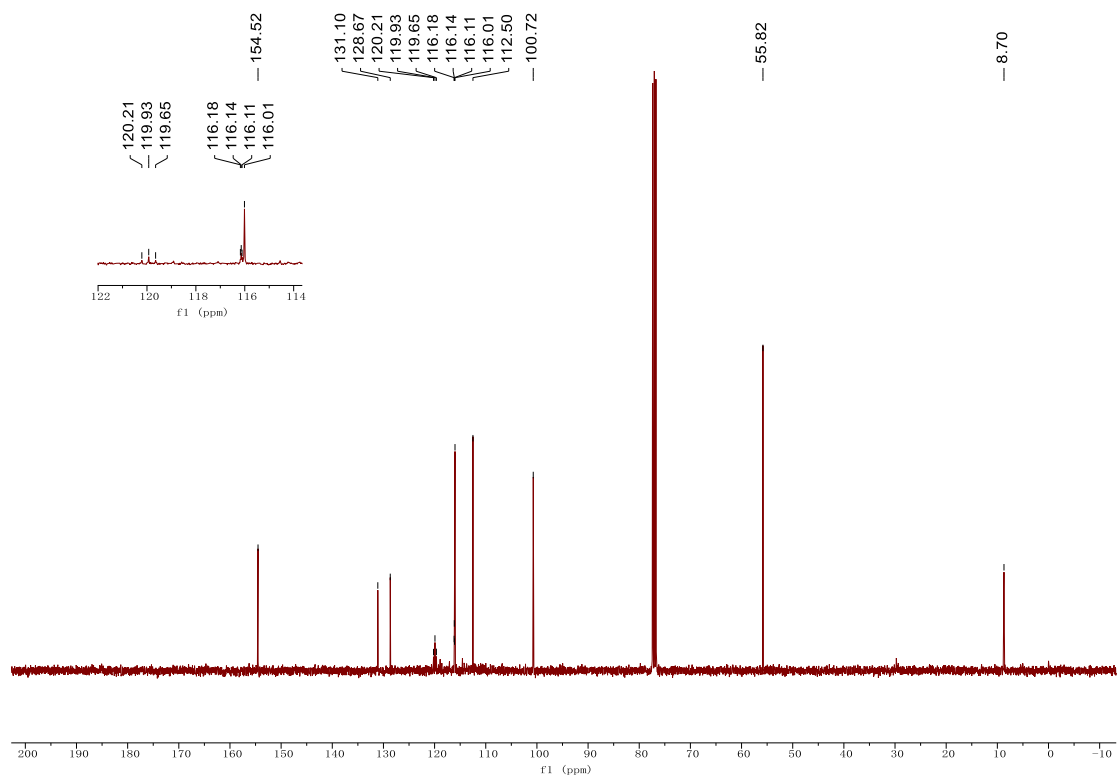



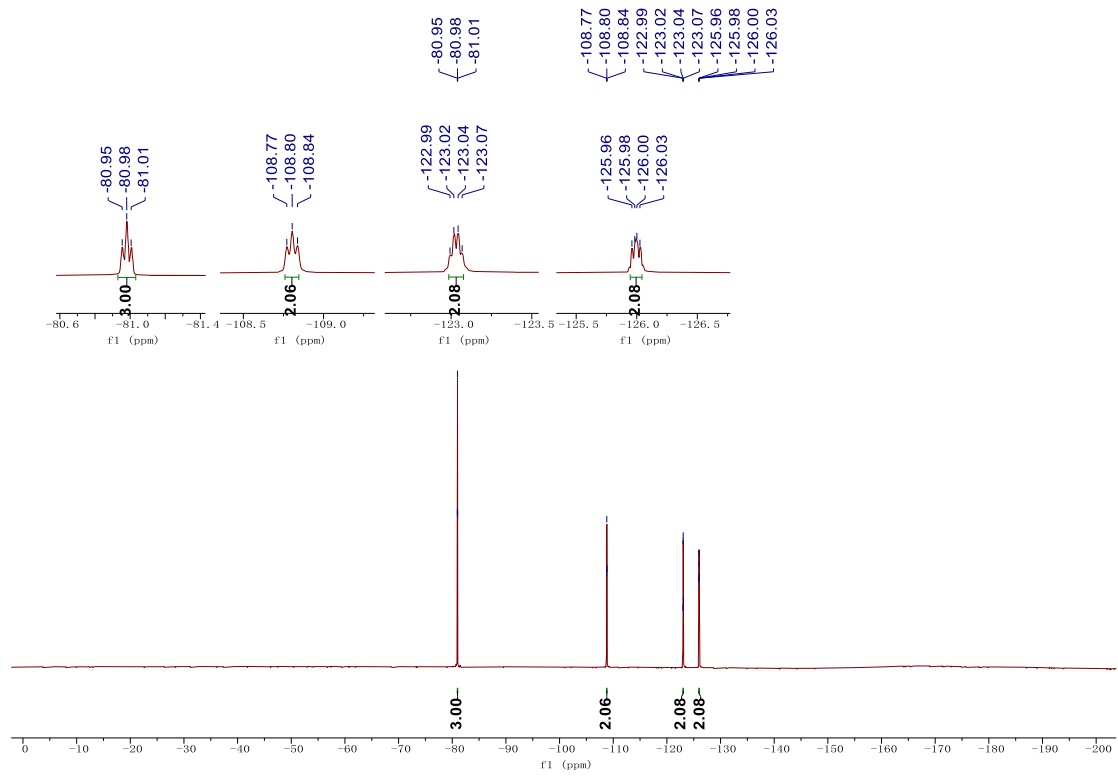

**5-(benzyloxy)-3-methyl-2-(perfluorobutyl)-1H-indole (3g)**

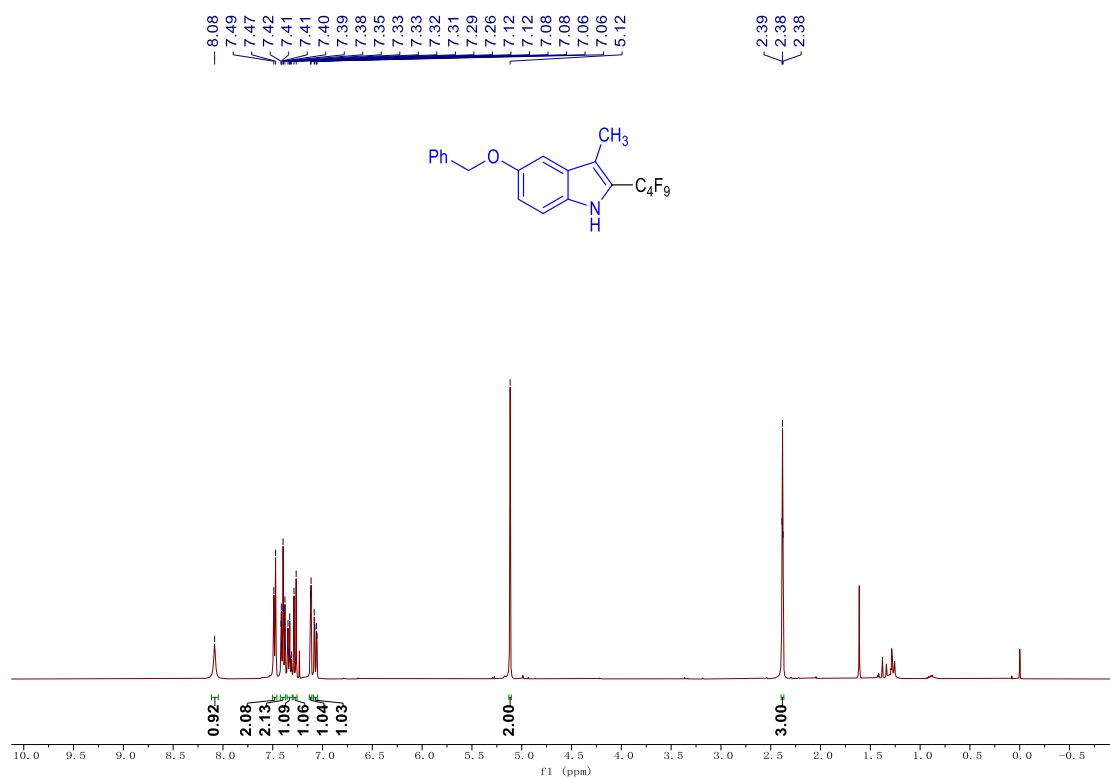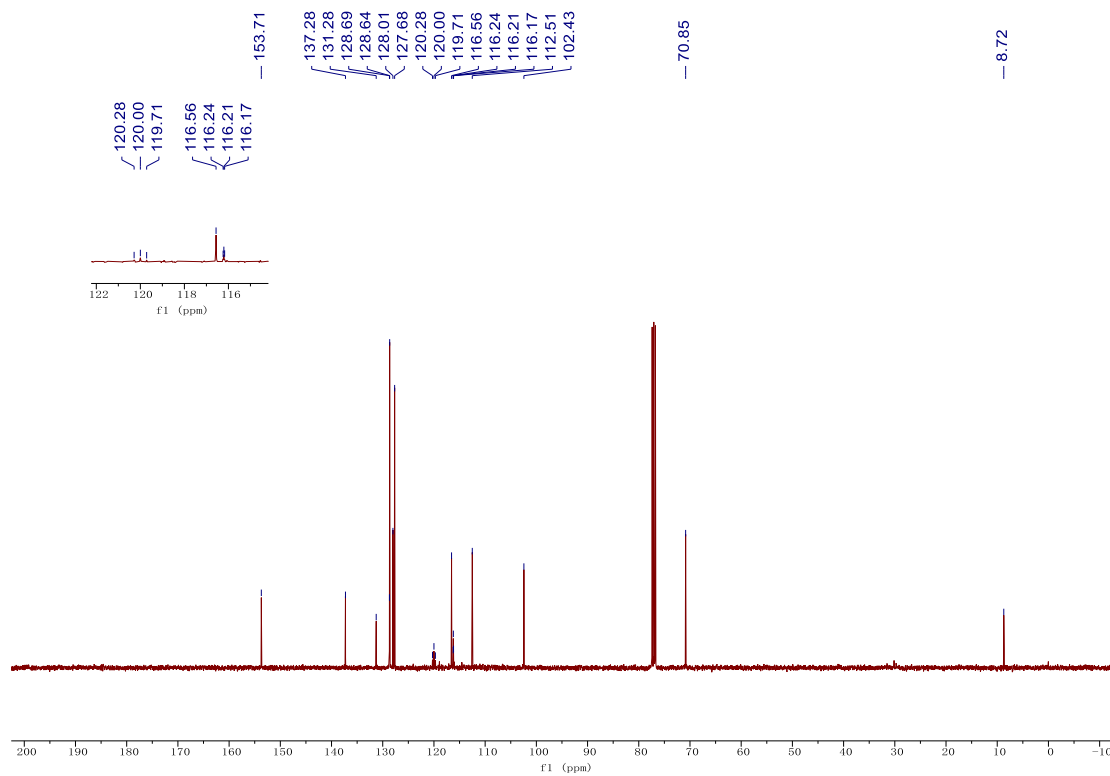

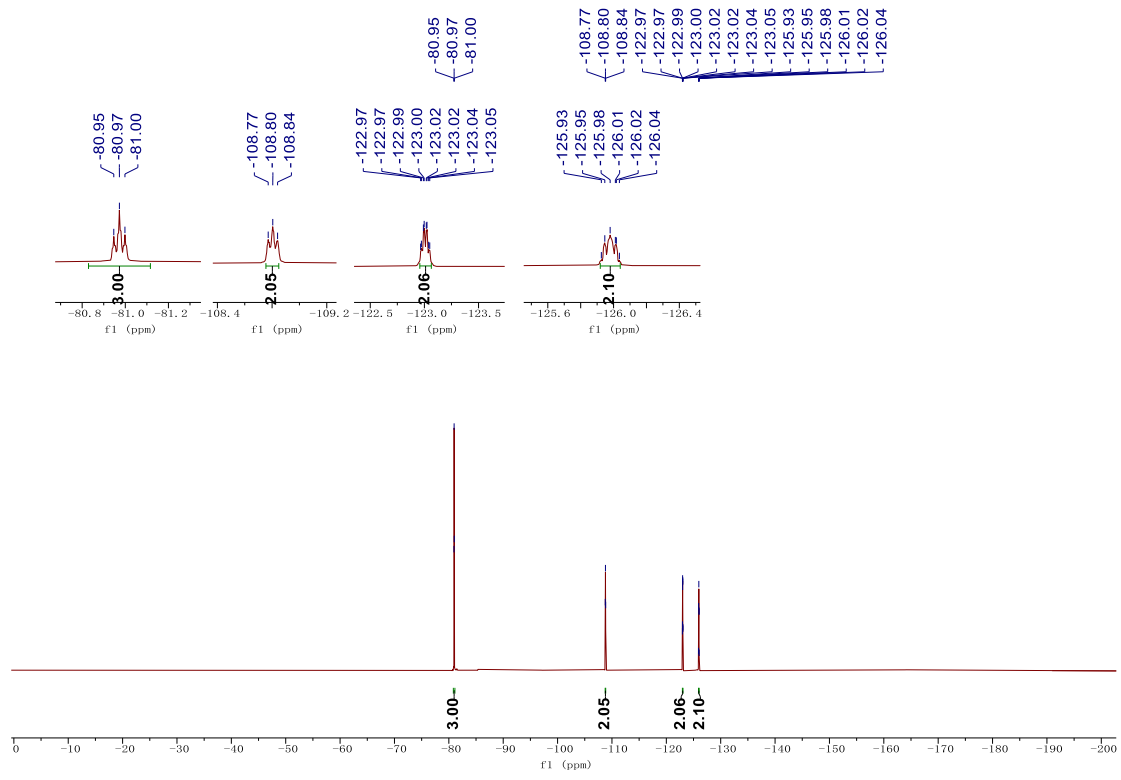

### 5-fluoro-3-methyl-2-(perfluorobutyl)-1H-indole (3h)

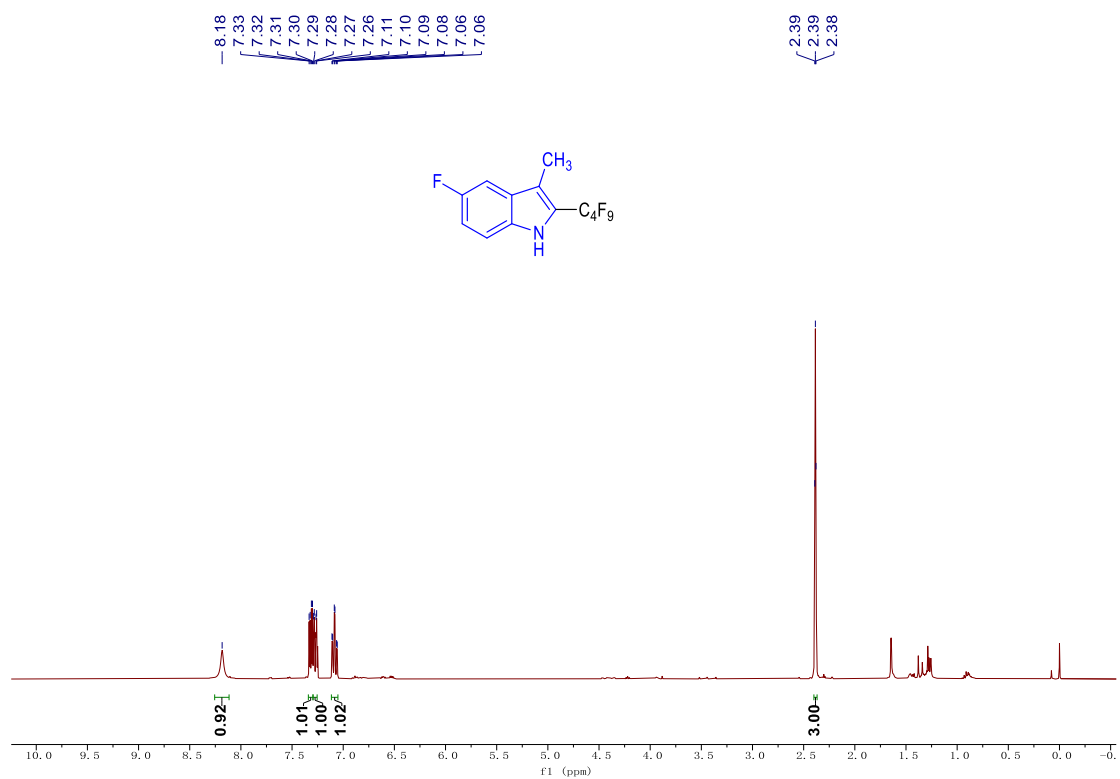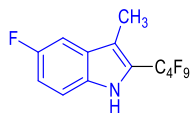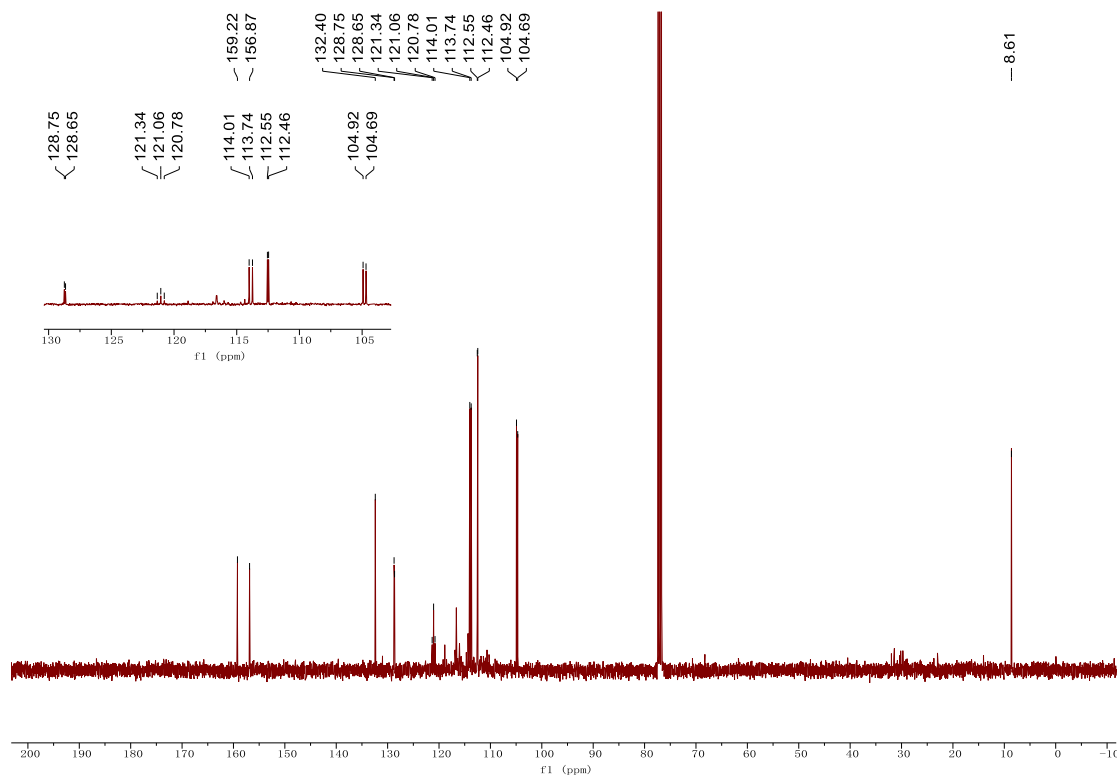

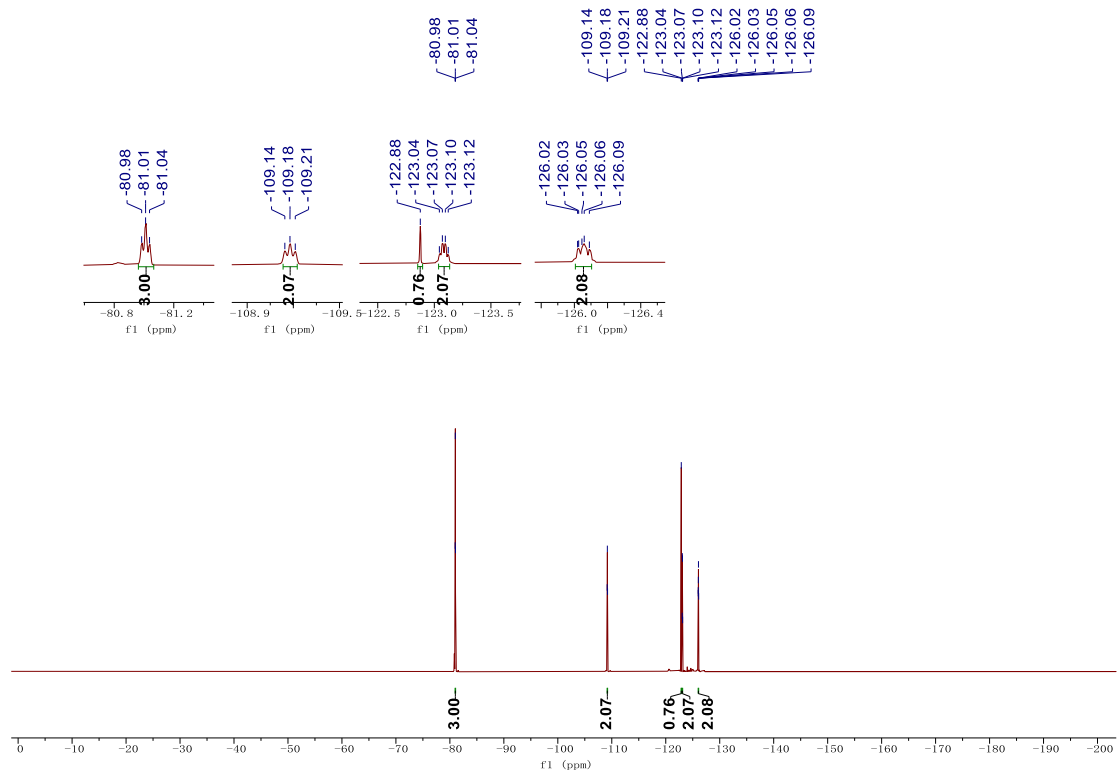

### 5-chloro-3-methyl-2-(perfluorobutyl)-1H-indole (3i)

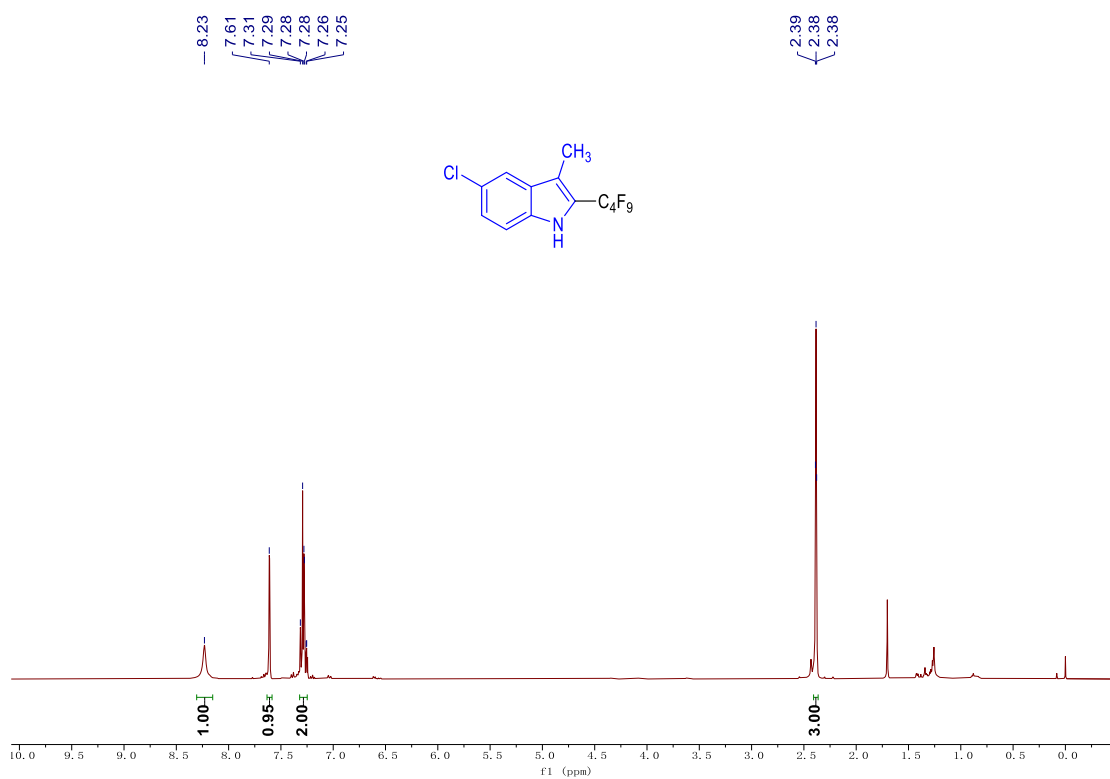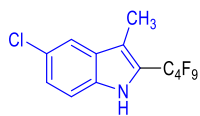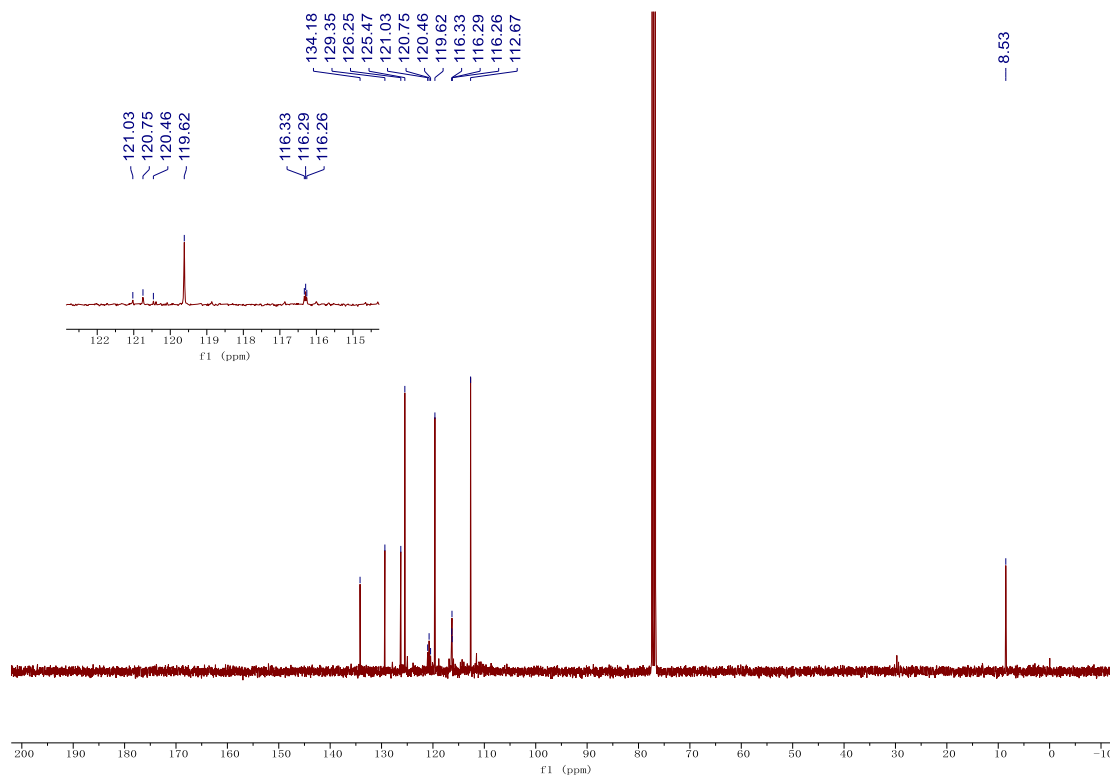

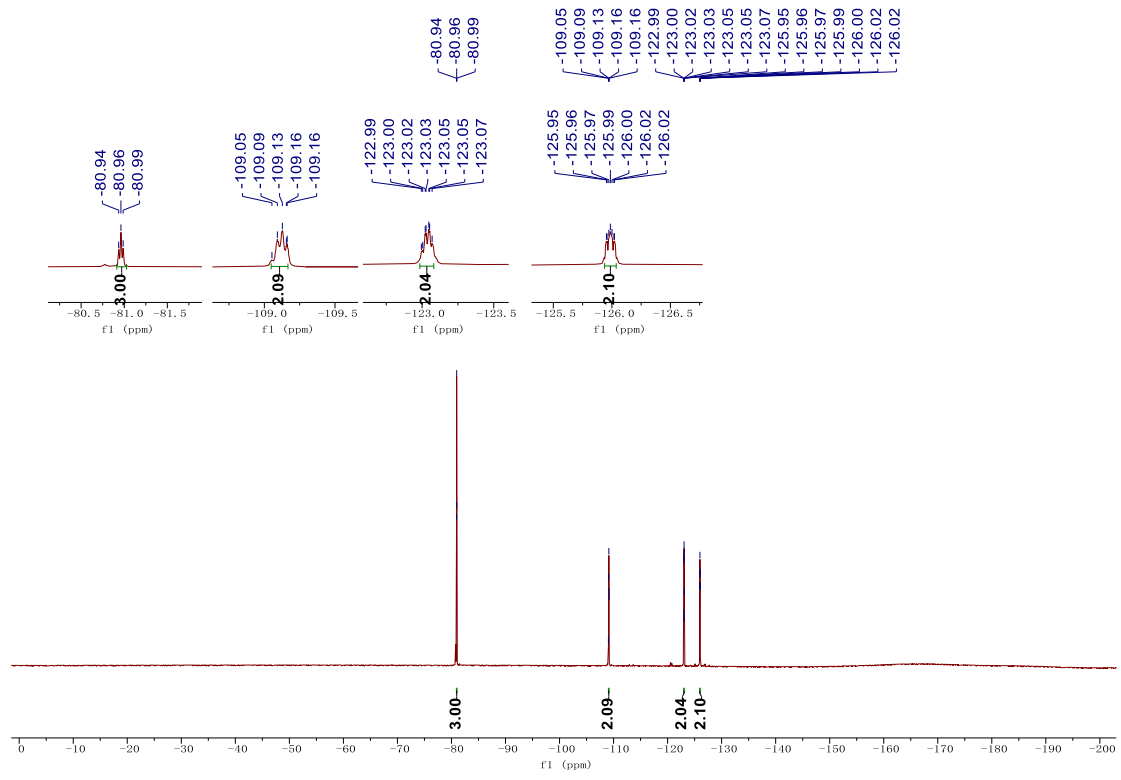

### 5-bromo-3-methyl-2-(perfluorobutyl)-1H-indole (3j)

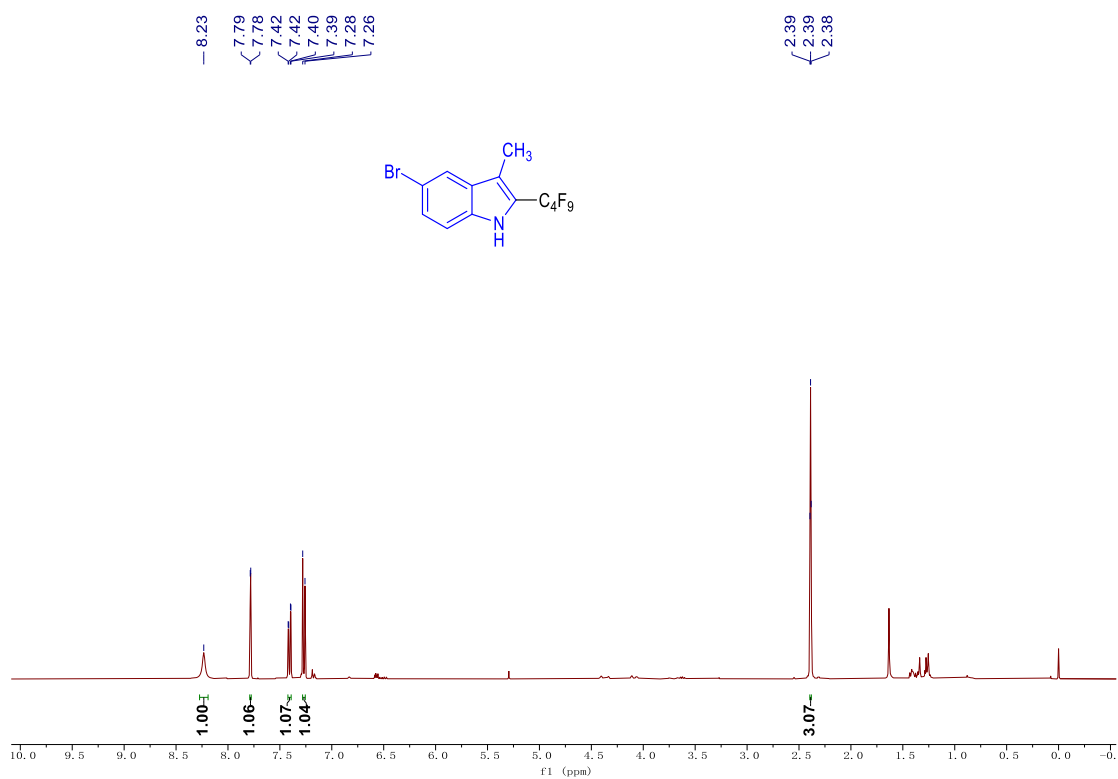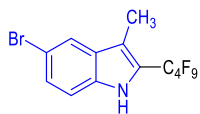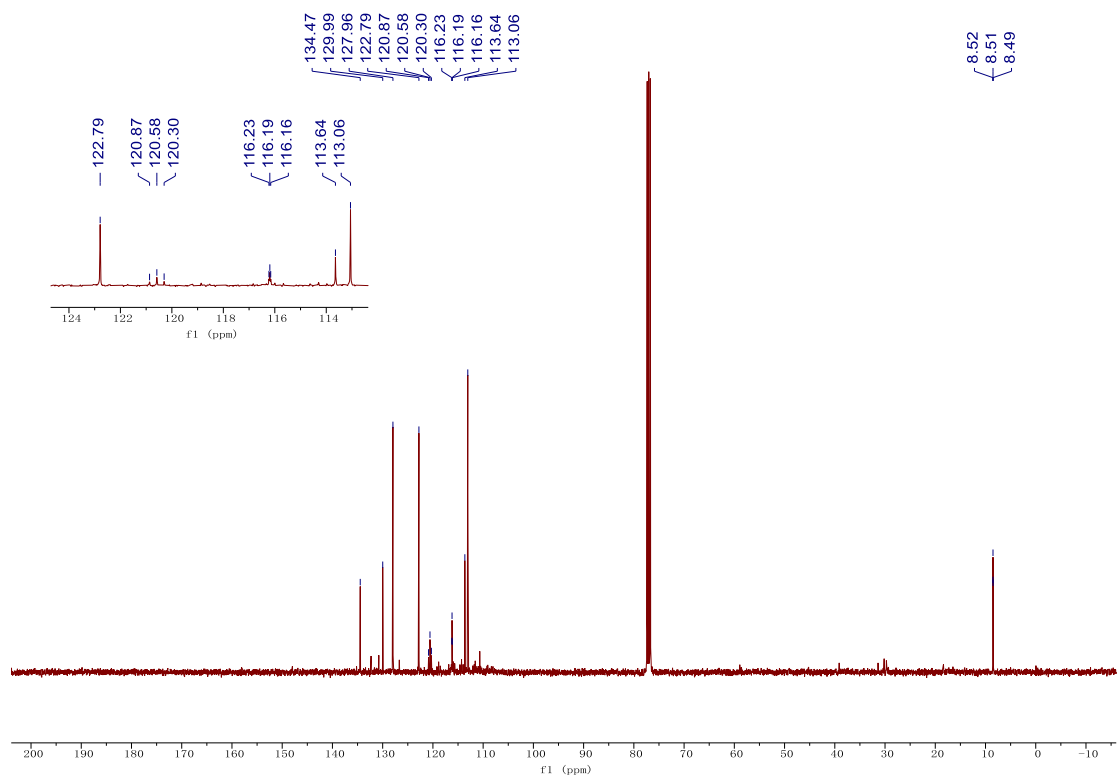



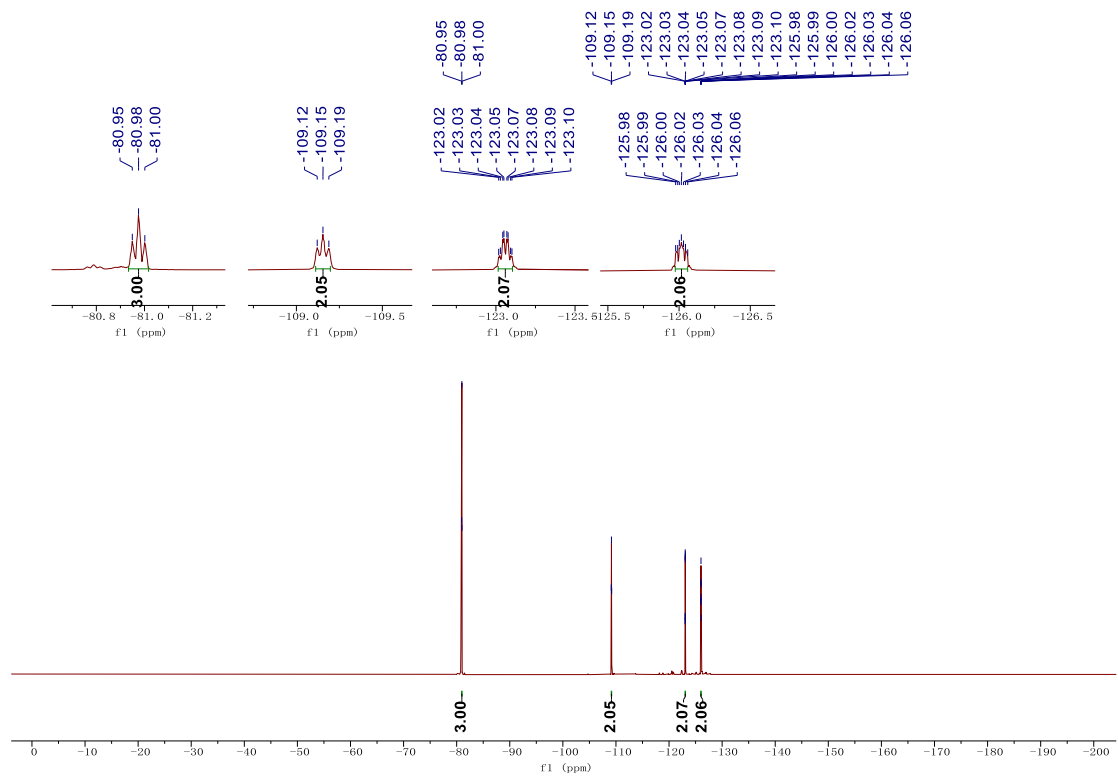

### 3,6-dimethyl-2-(perfluorobutyl)-1H-indole (3k)

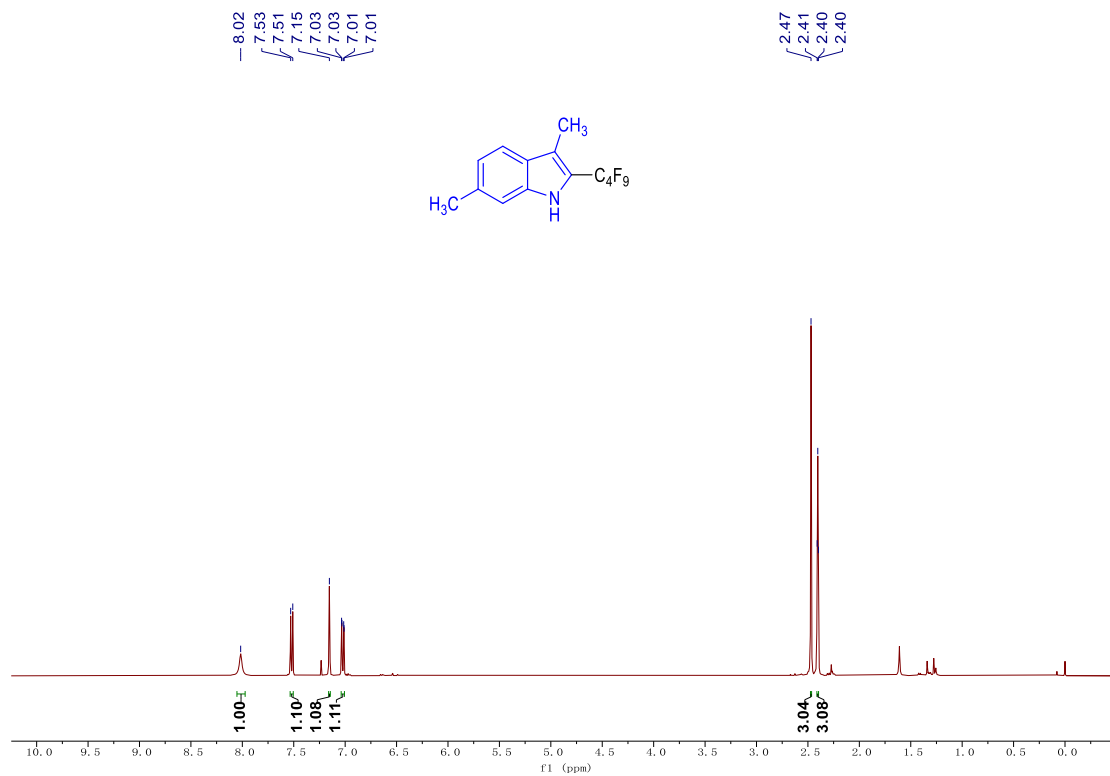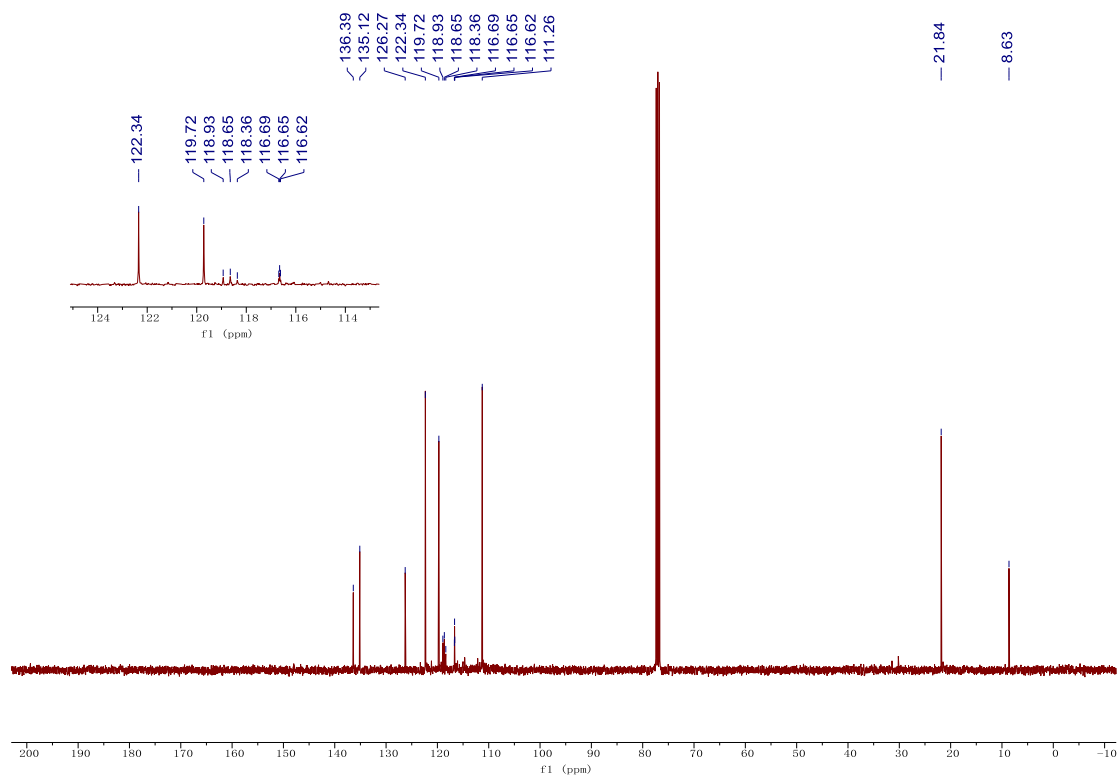

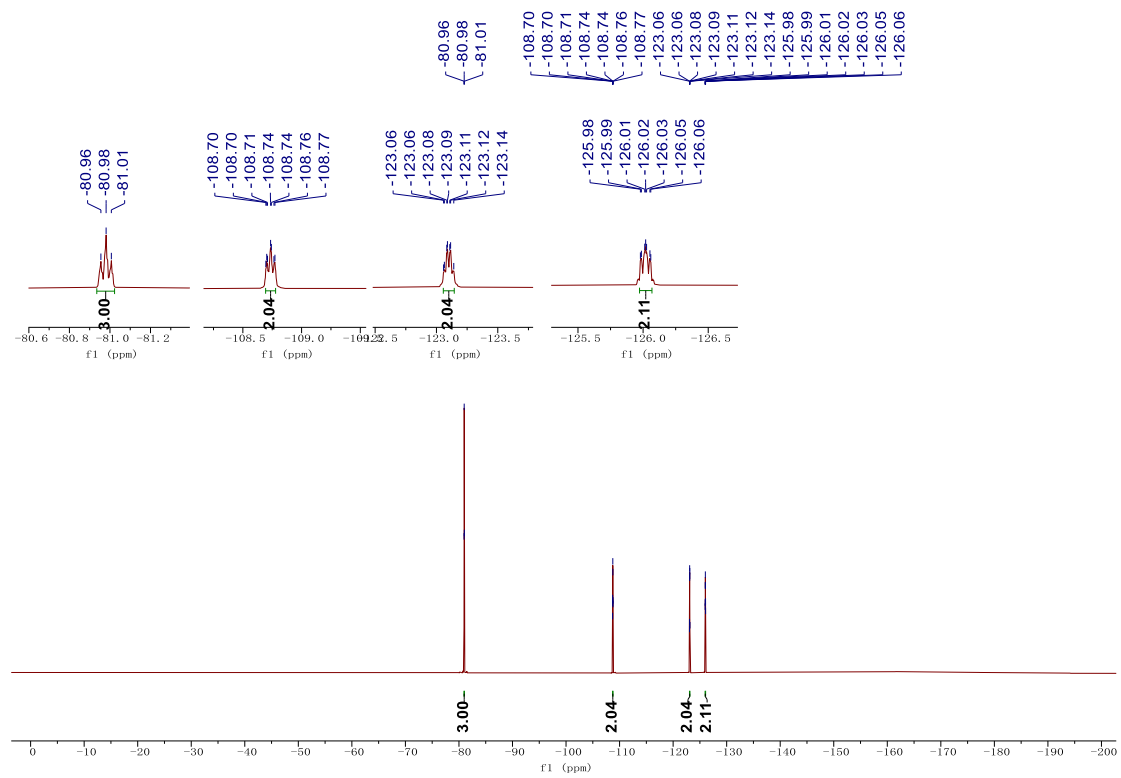

6-methoxy-3-methyl-2-(perfluorobutyl)-1H-indole (3I)

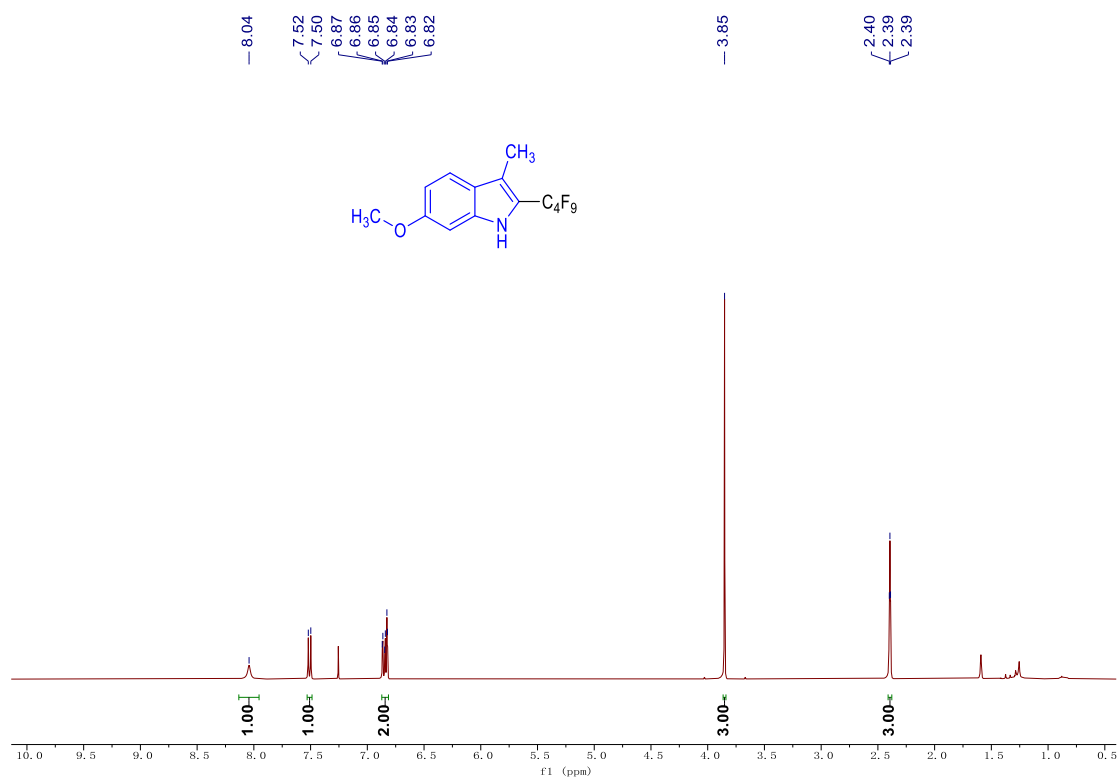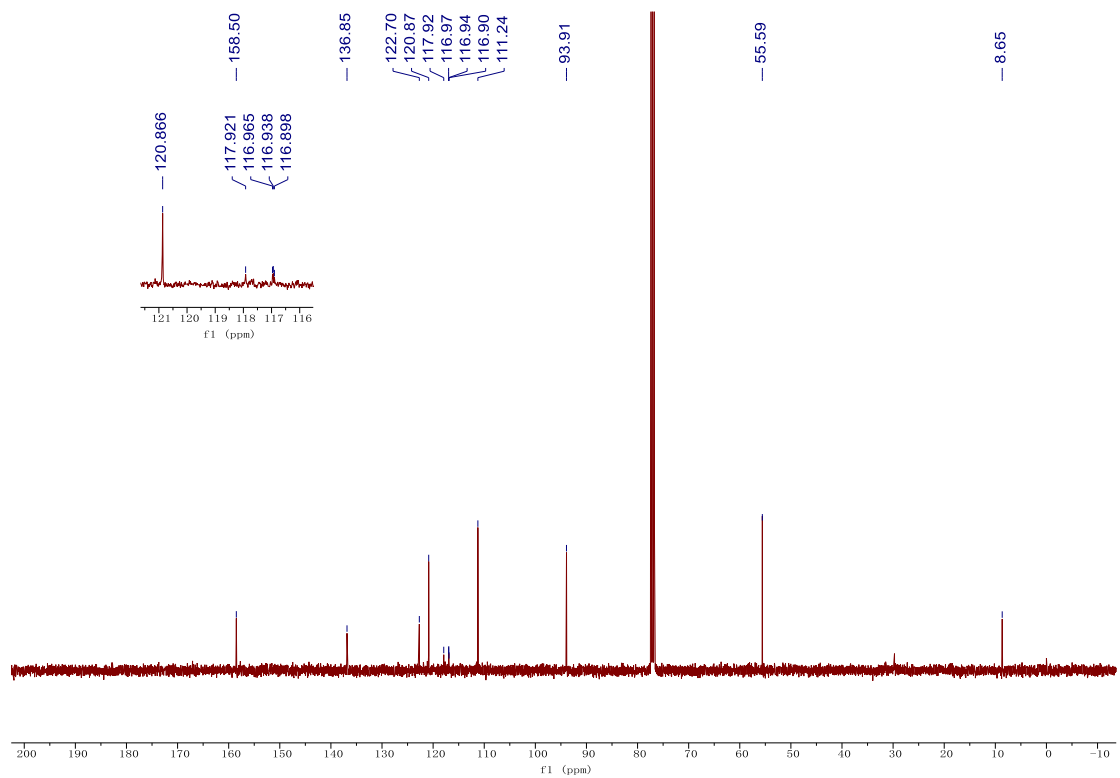

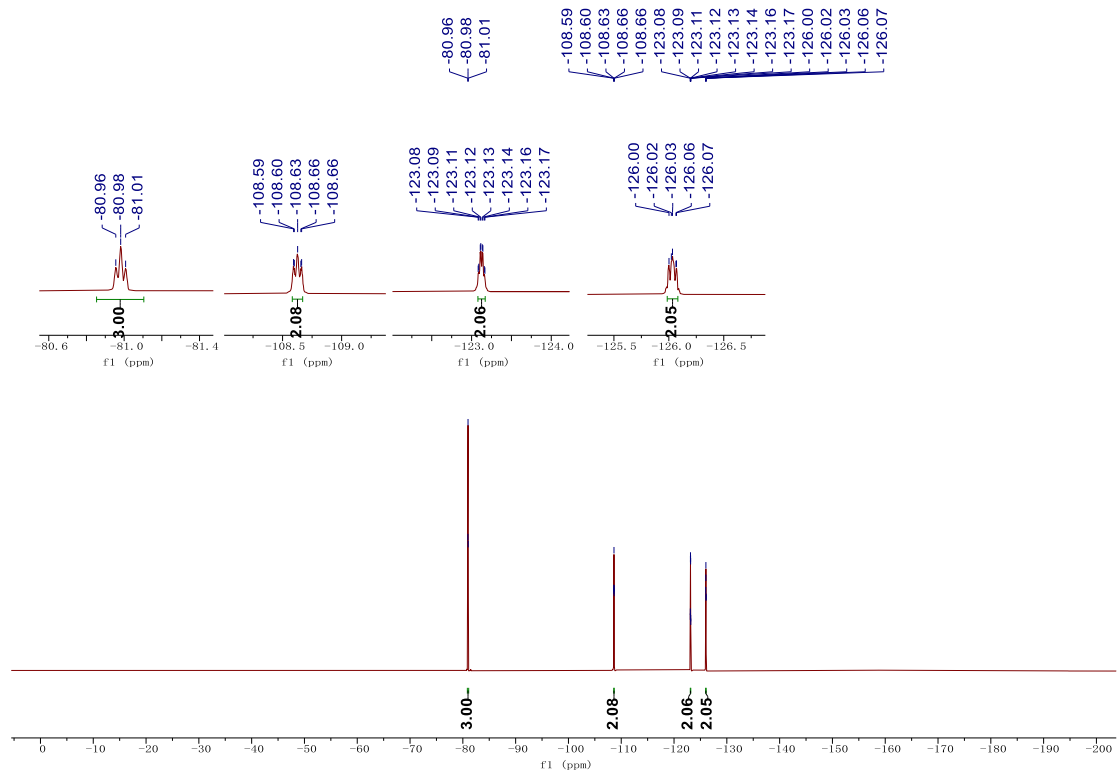

# 6-fluoro-3-methyl-2-((perfluorobutyl)-1H-indole (3m)

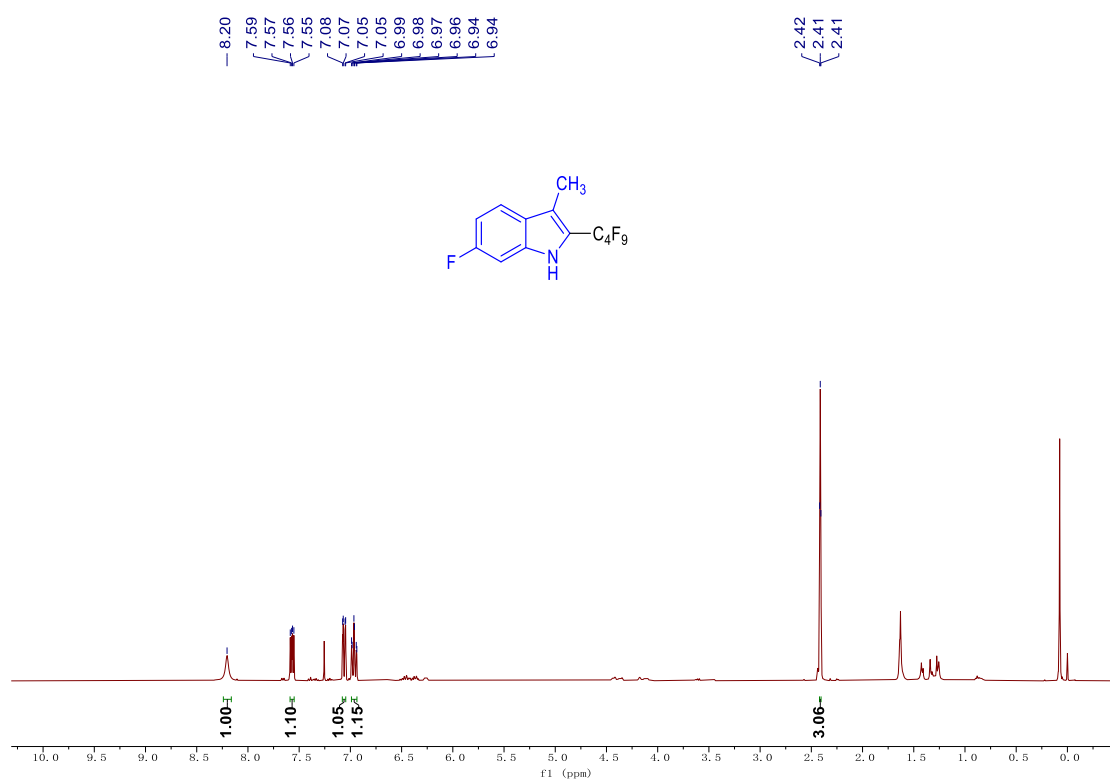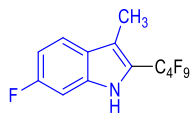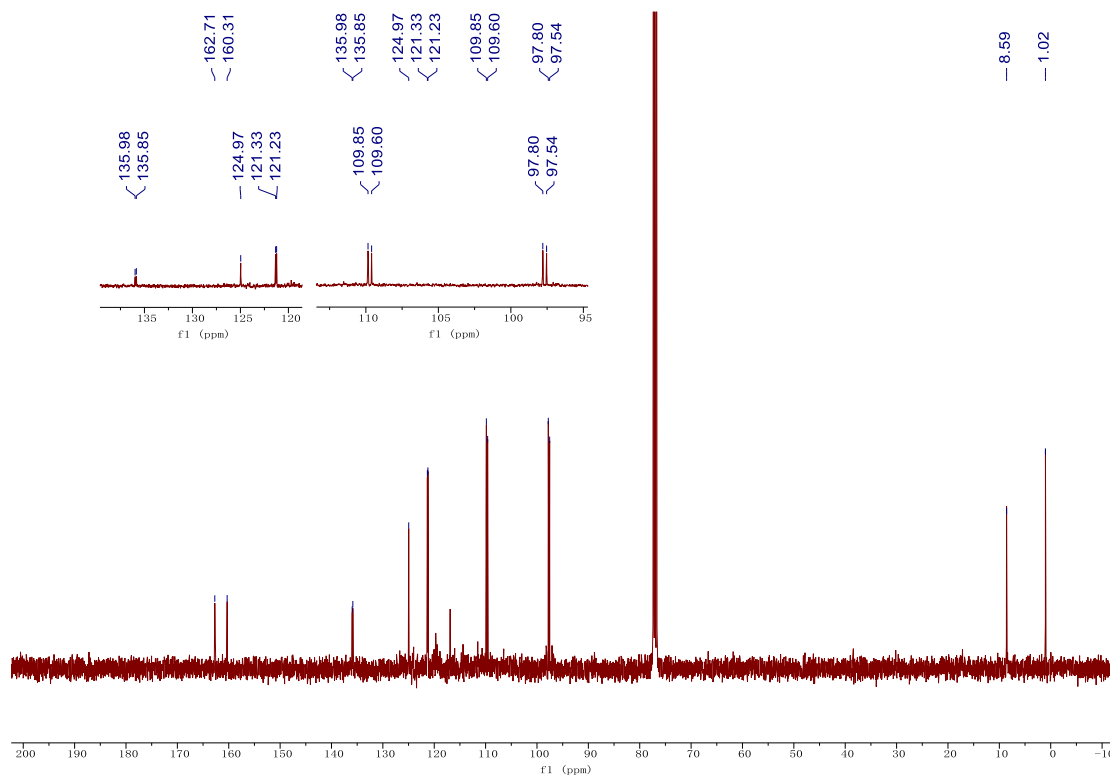

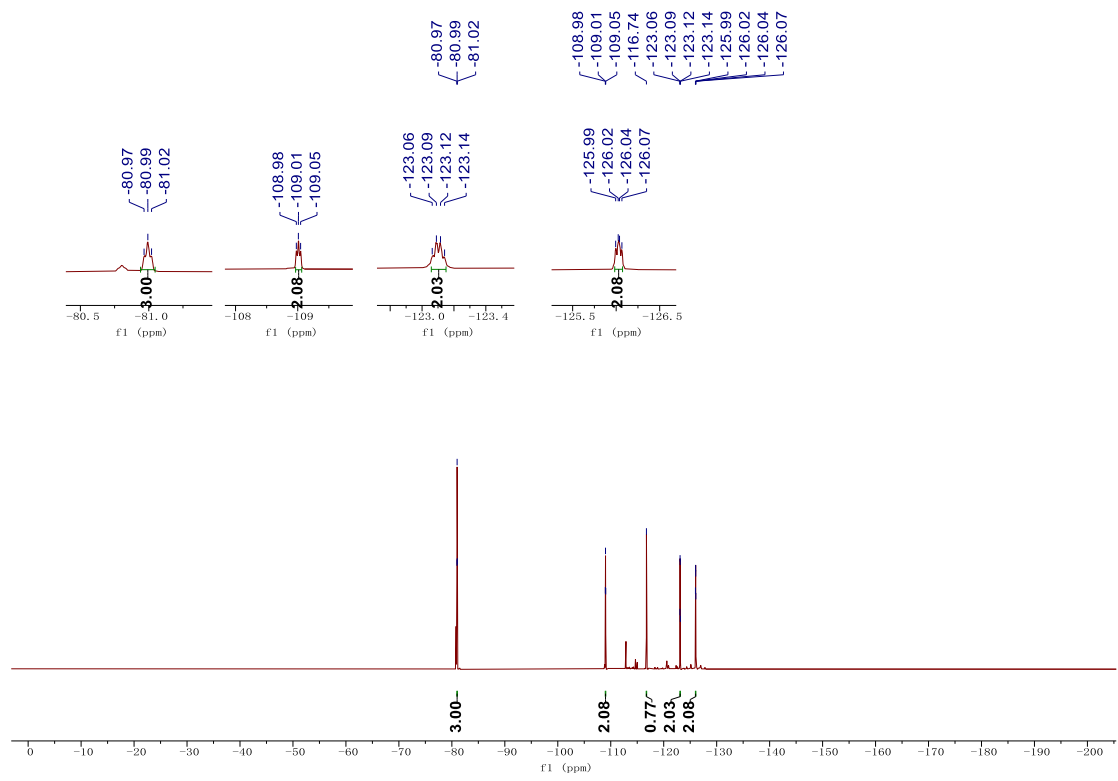

### 6-chloro-3-methyl-2-(perfluorobutyl)-1H-indole (3n)

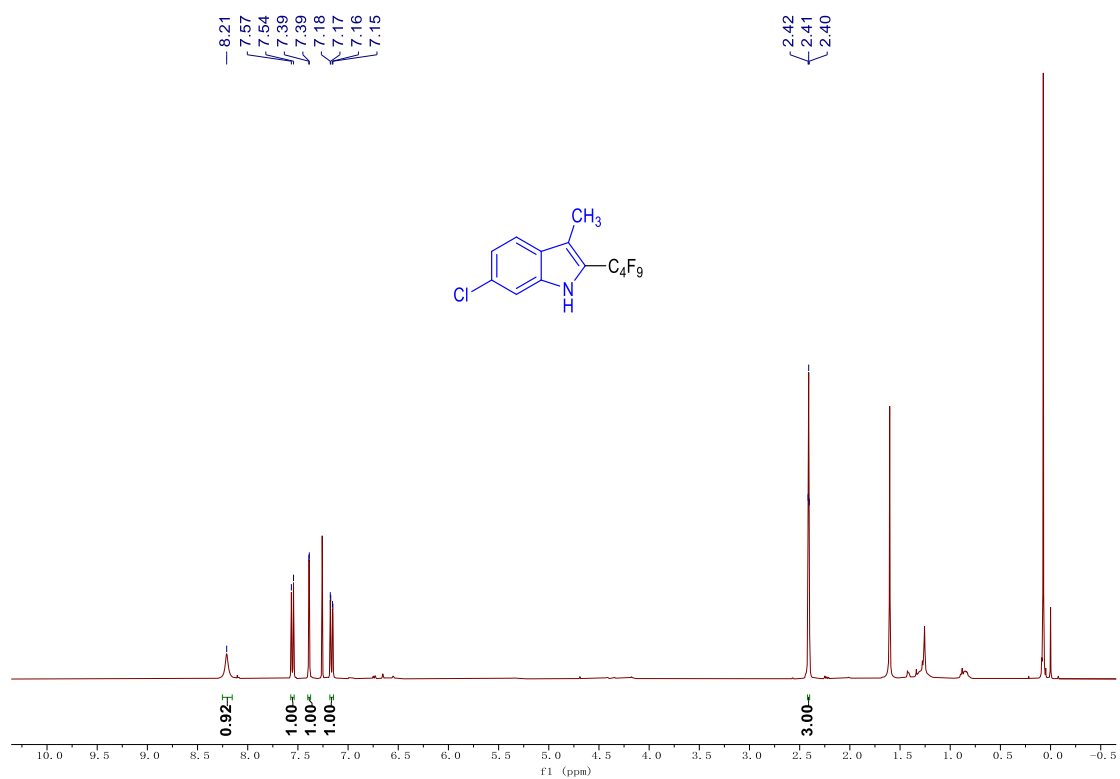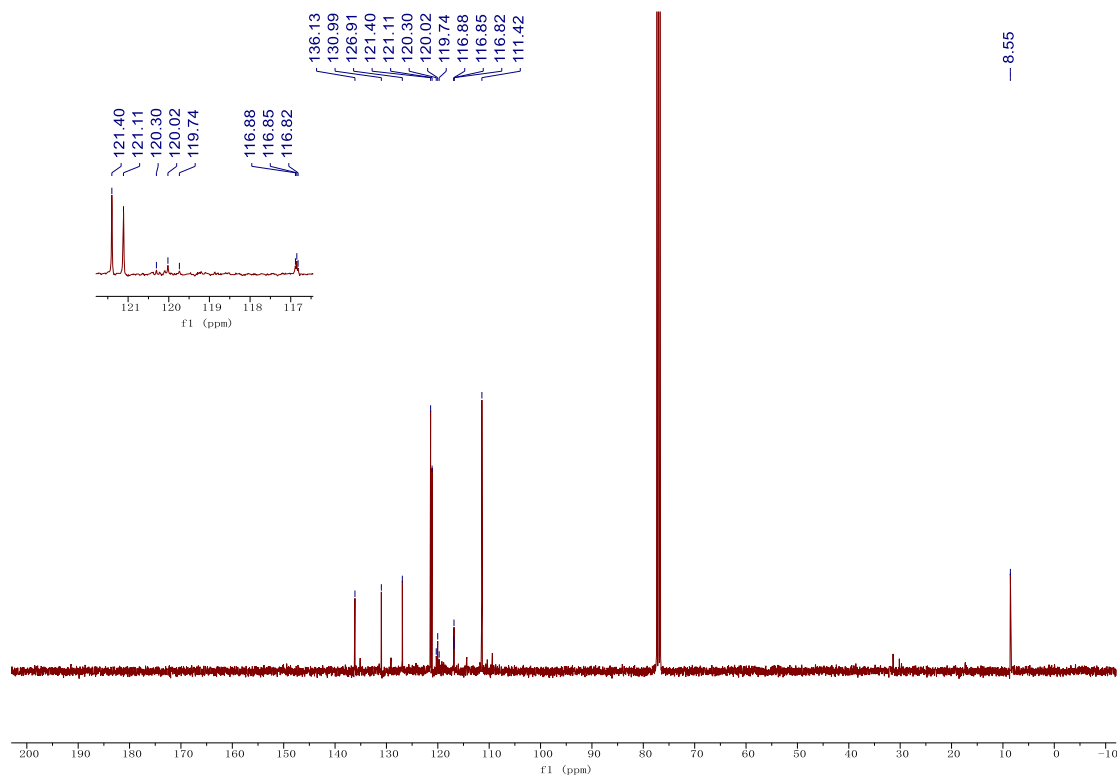



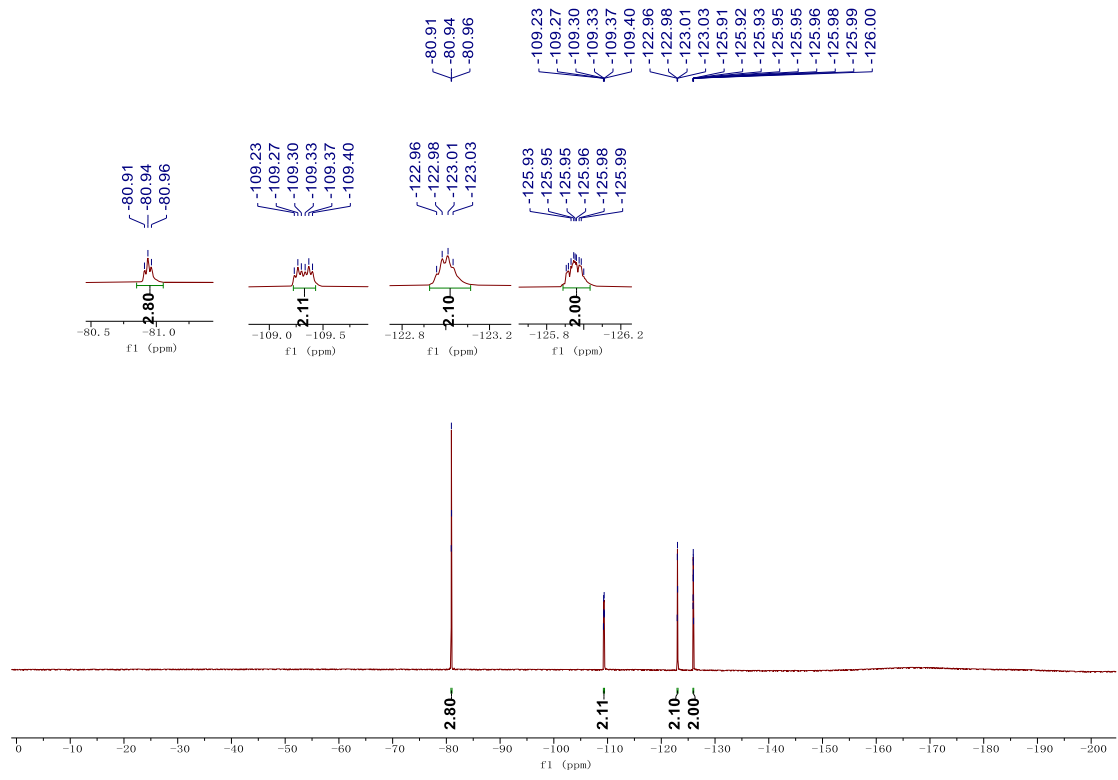

### 3,7-dimethyl-2-(perfluorobutyl)-1H-indole (3o)

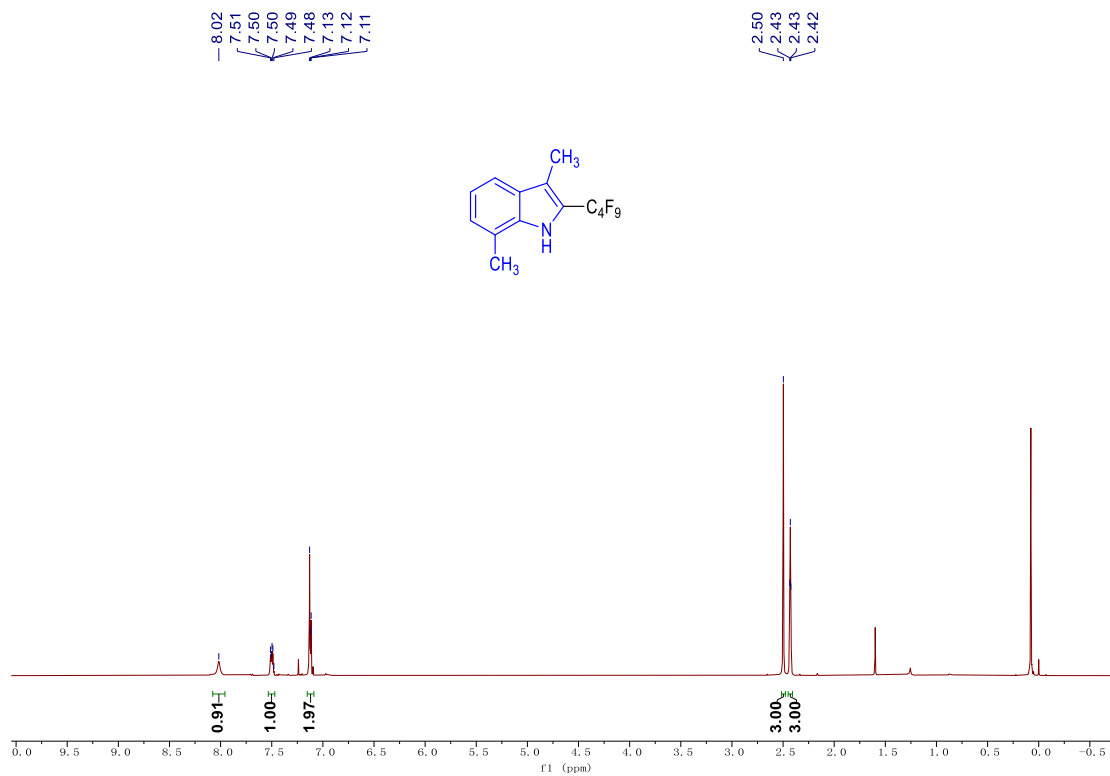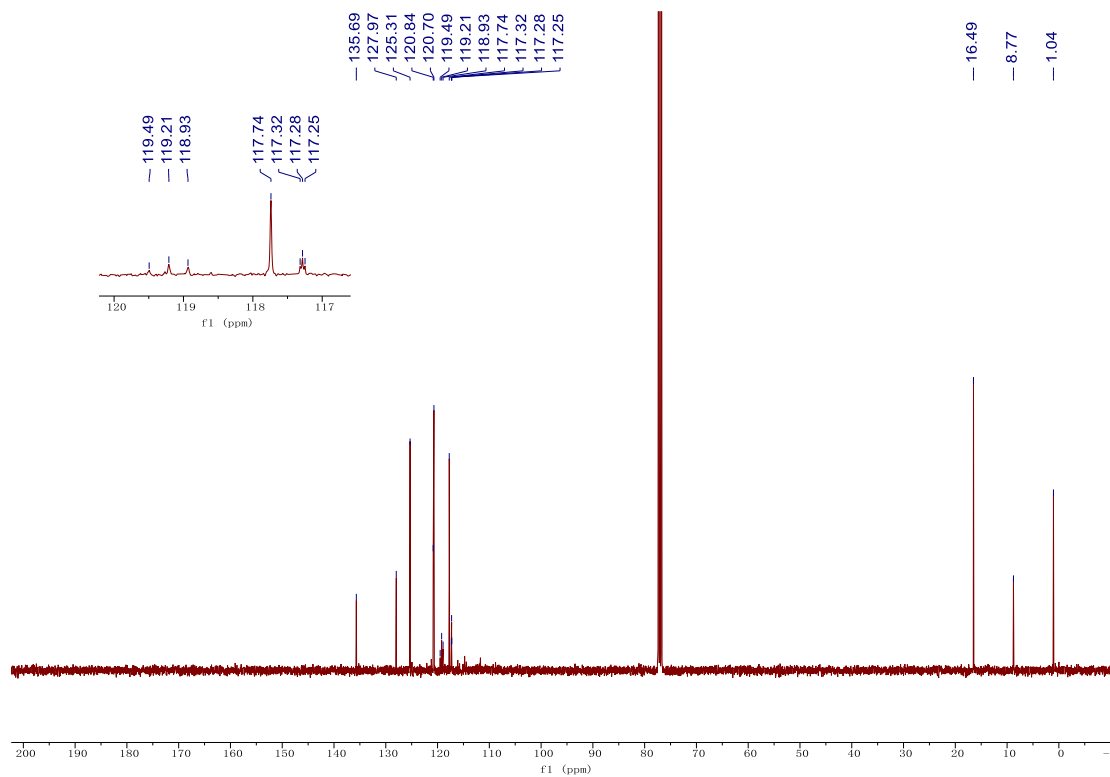

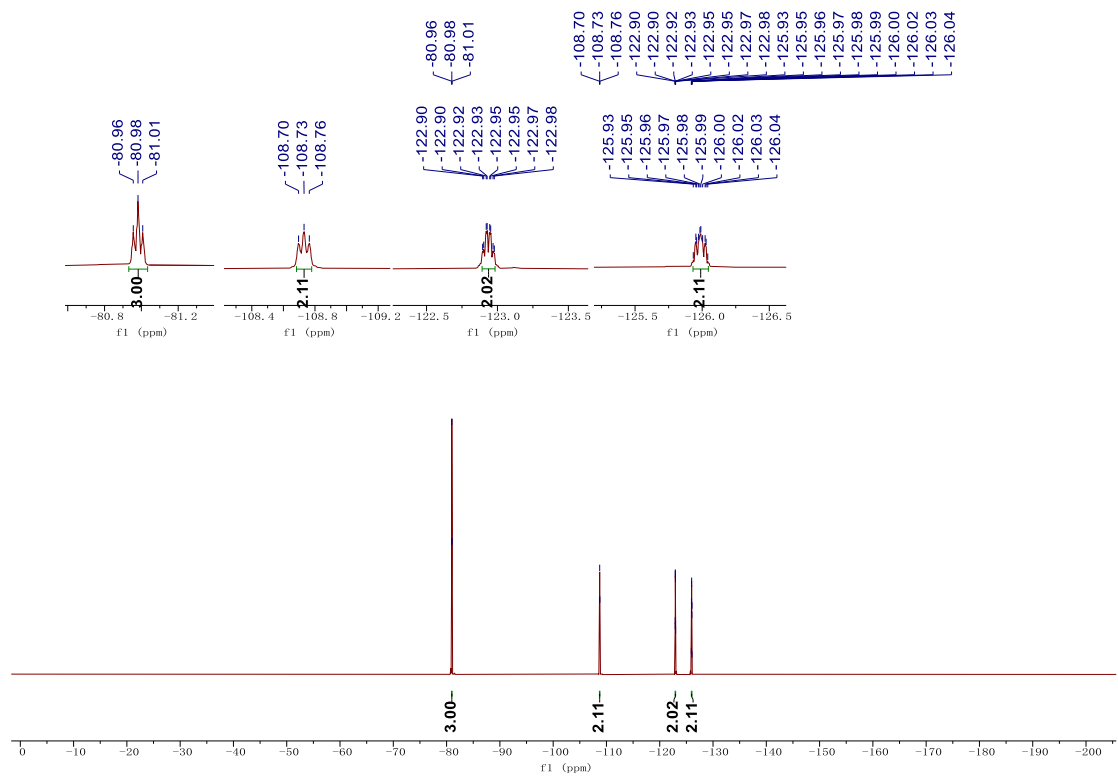

# 7-chloro-3-methyl-2-(perfluorobutyl)-1H-indole (3p)

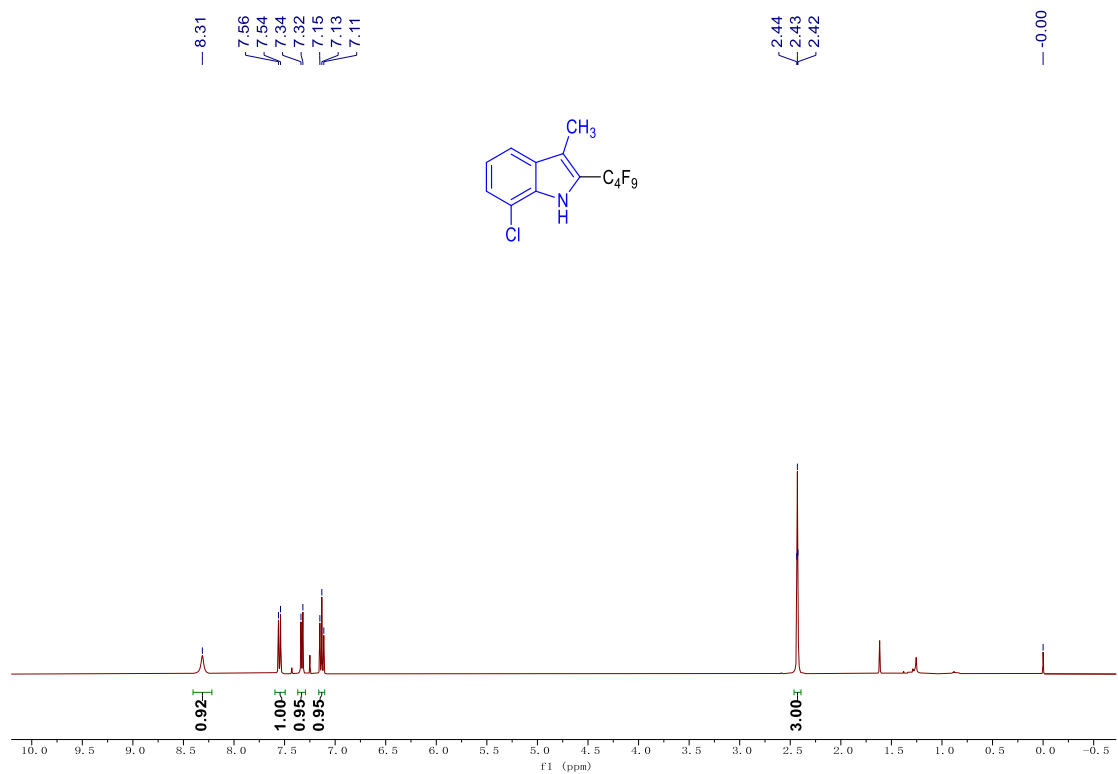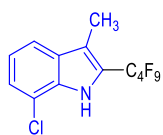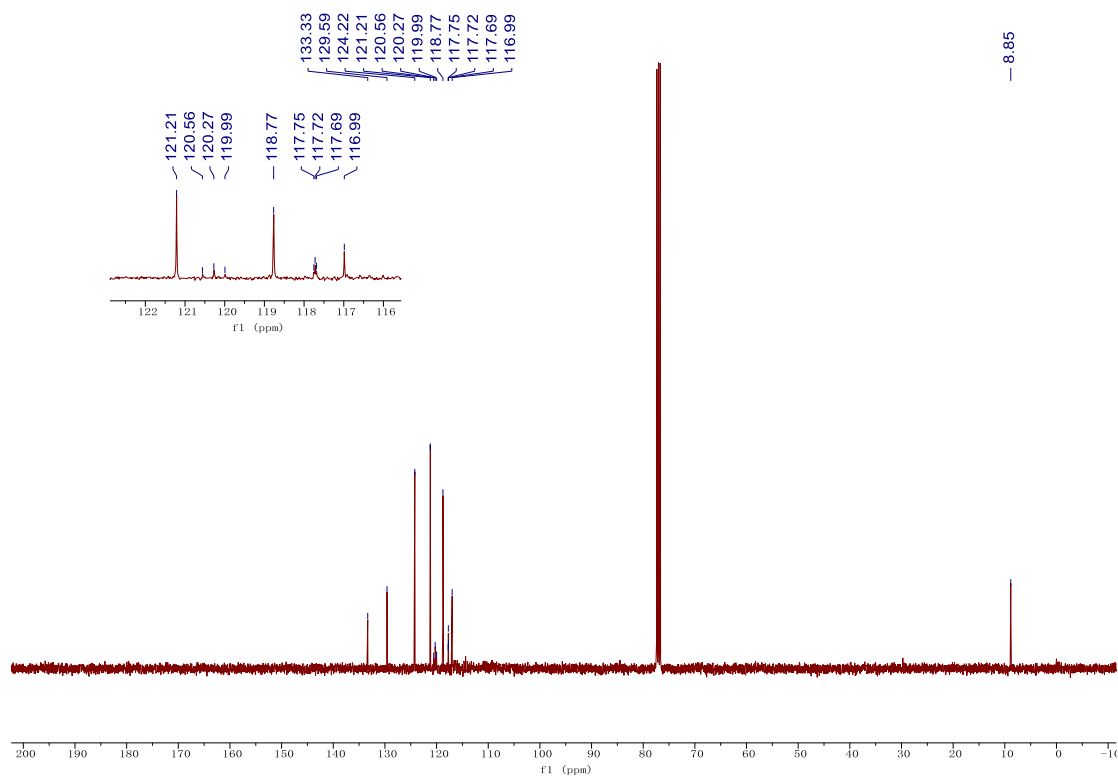

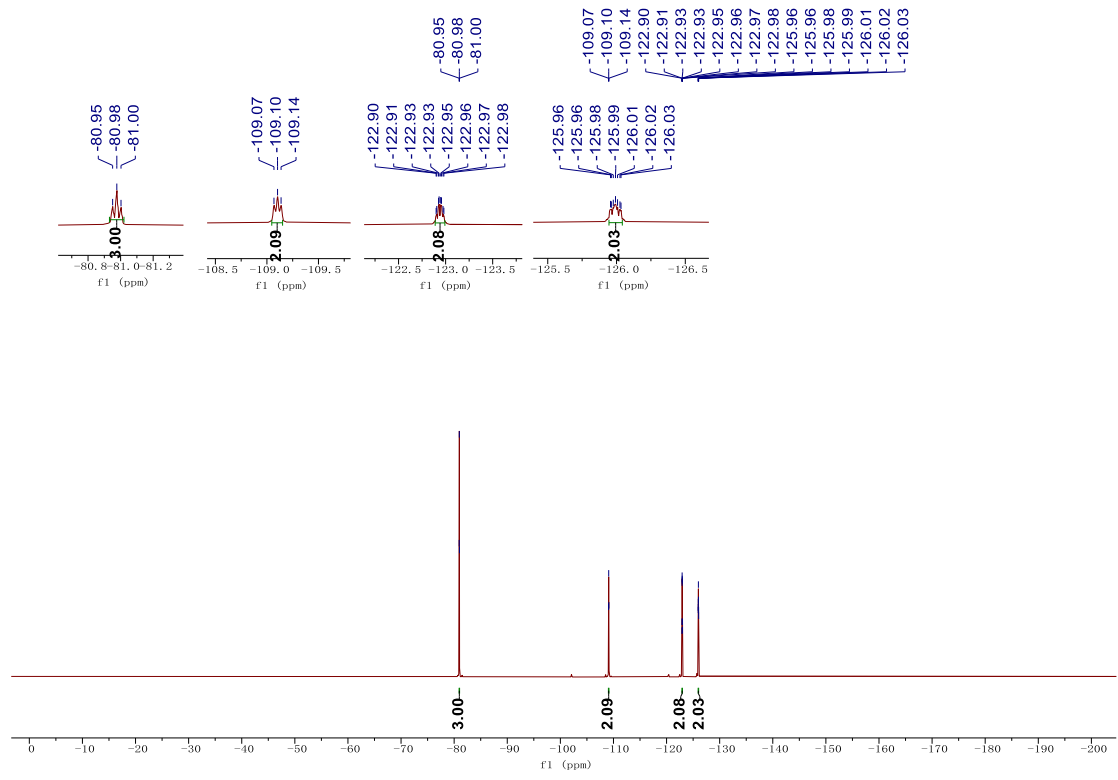

# 7-bromo-3-methyl-2-(perfluorobutyl)-1H-indole (3q)

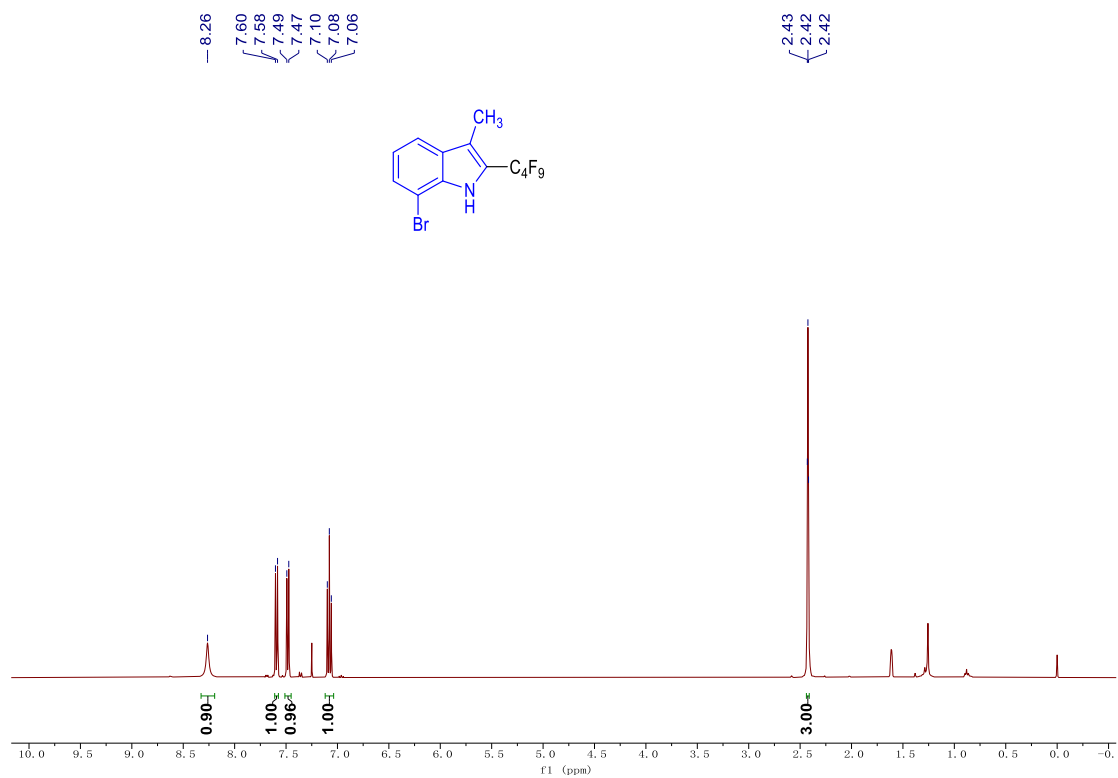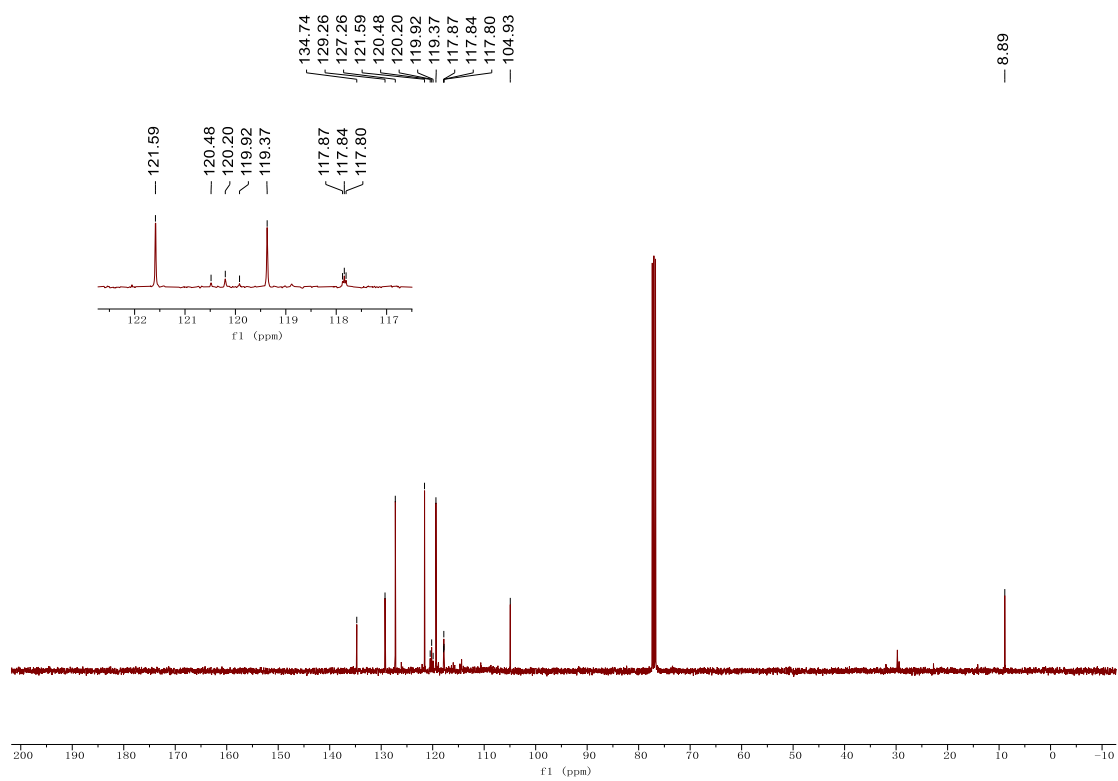

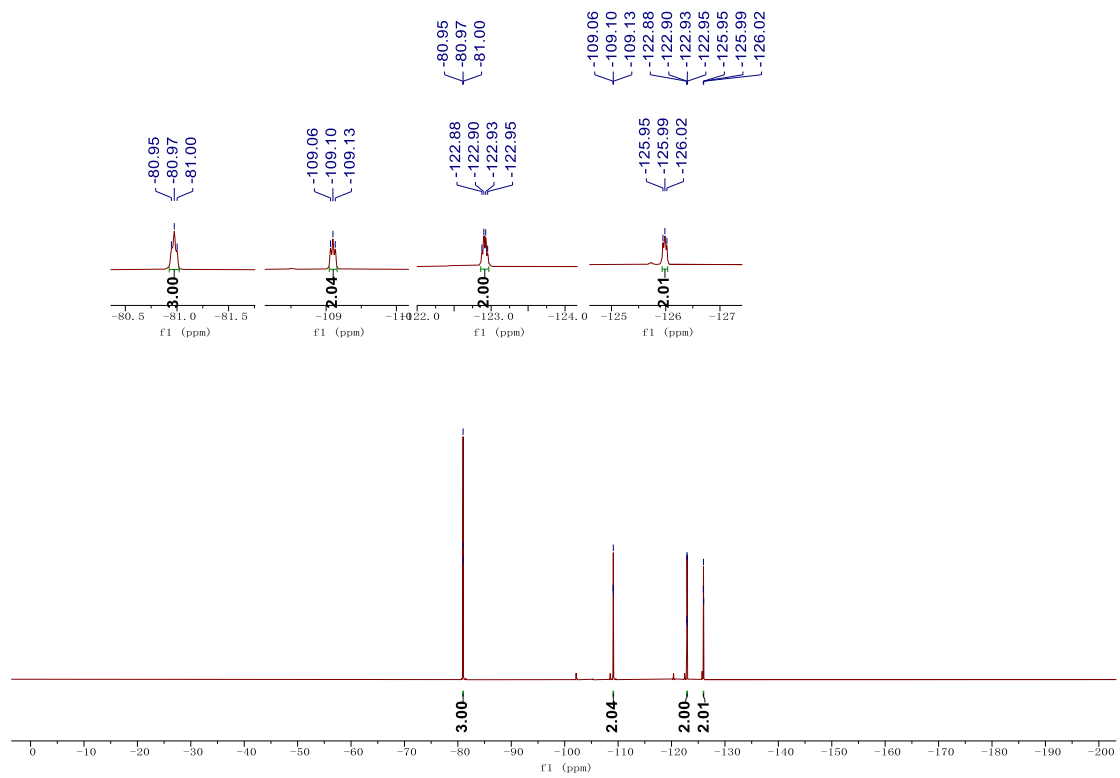

# 1,3-Dimethyl-2-(perfluorohexyl)-1H-indole (3r)

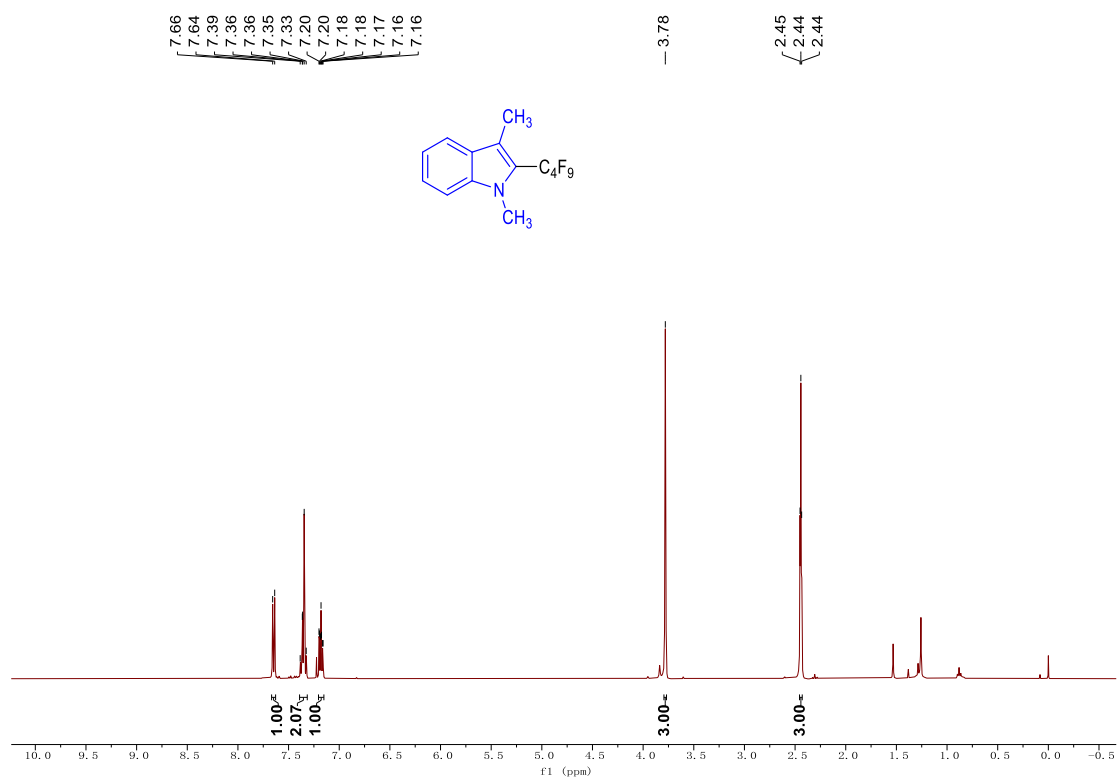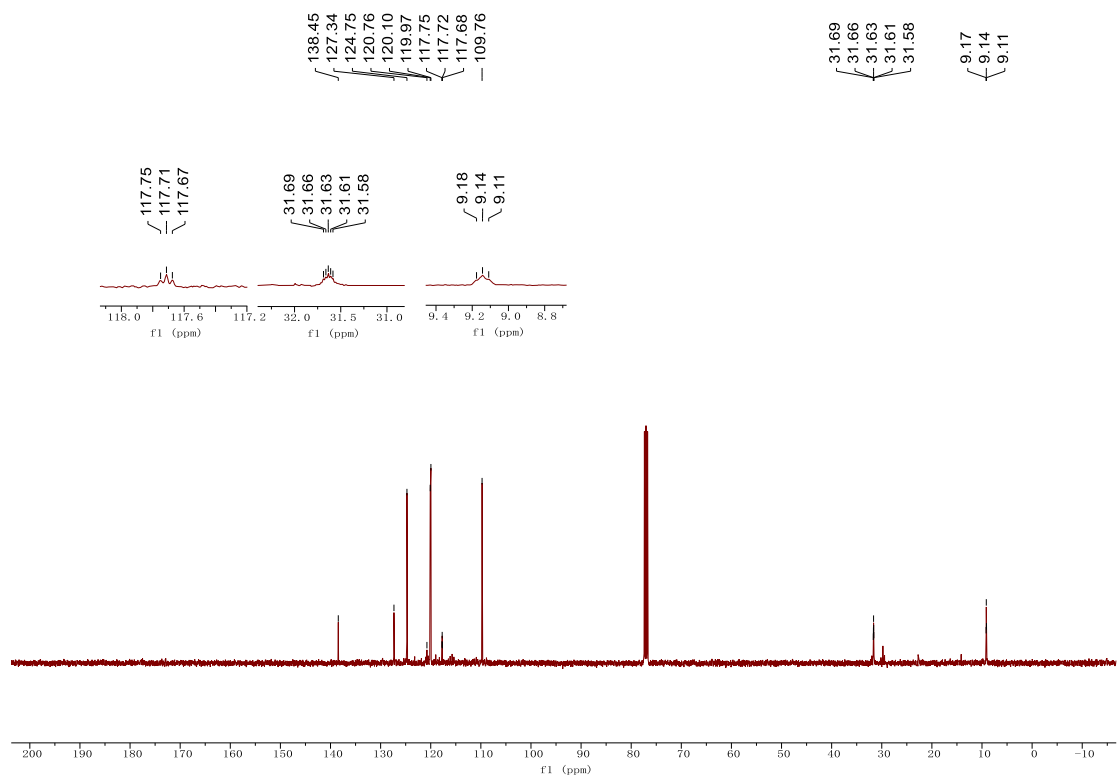



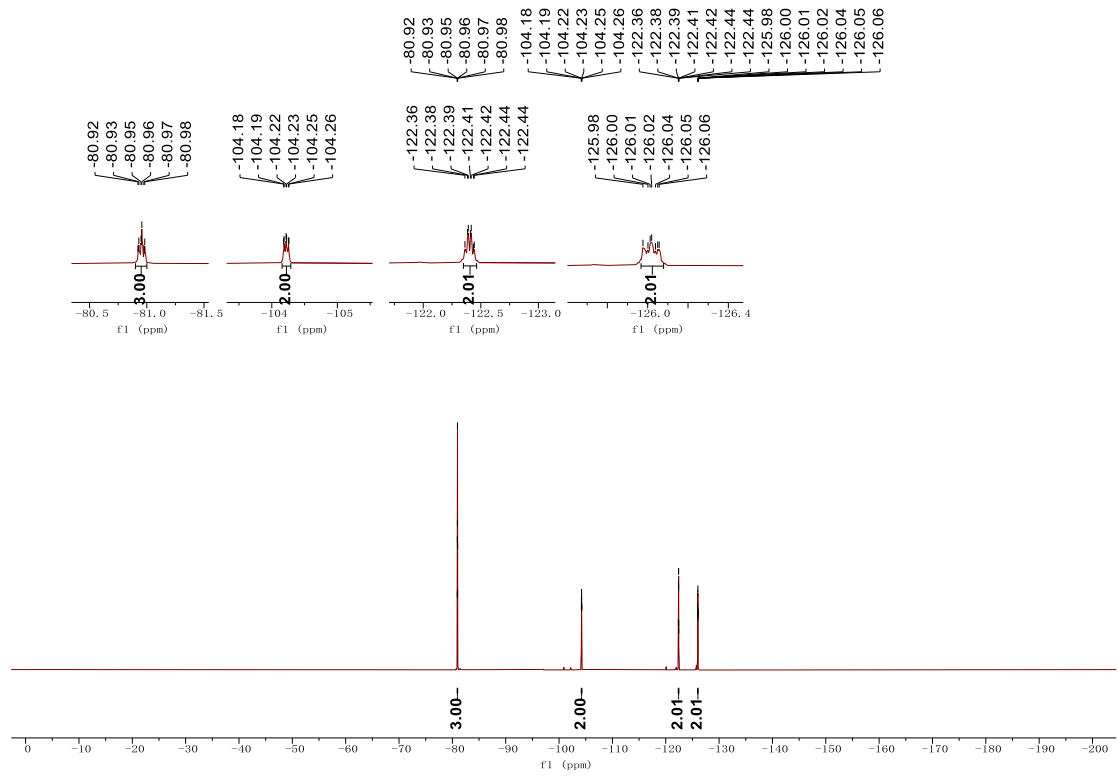

# 1-Benzyl-3-methyl-2-(perfluorobutyl)-1H-indole (3s)

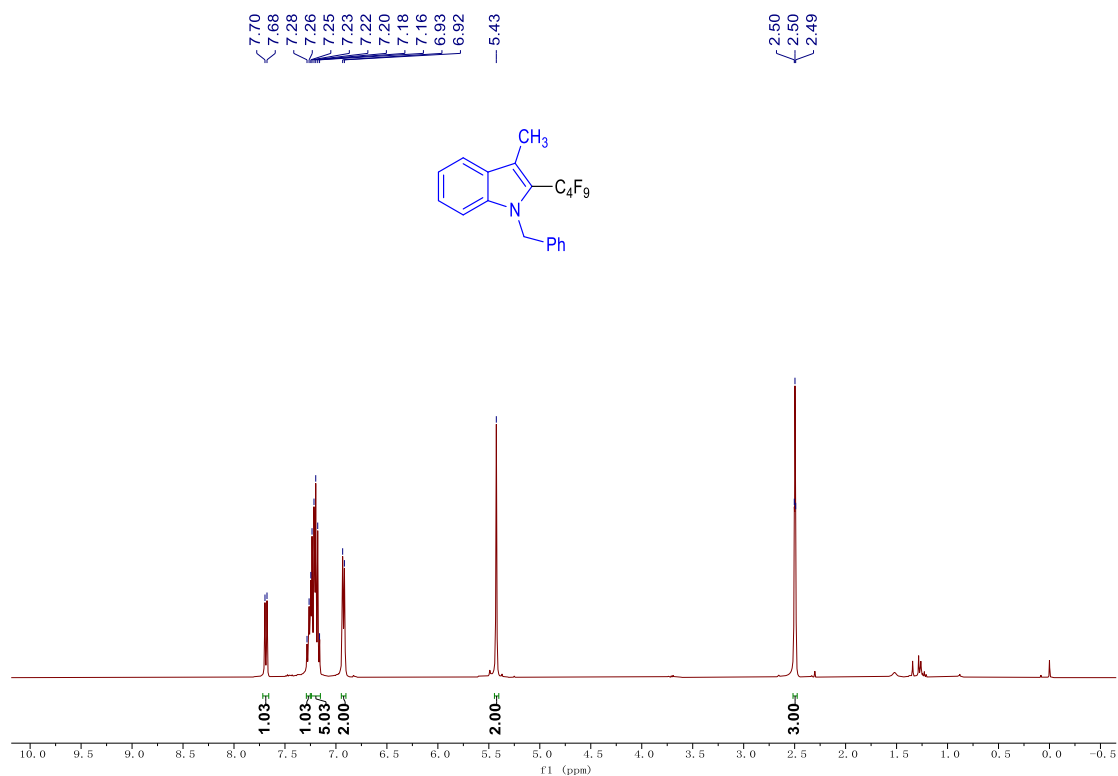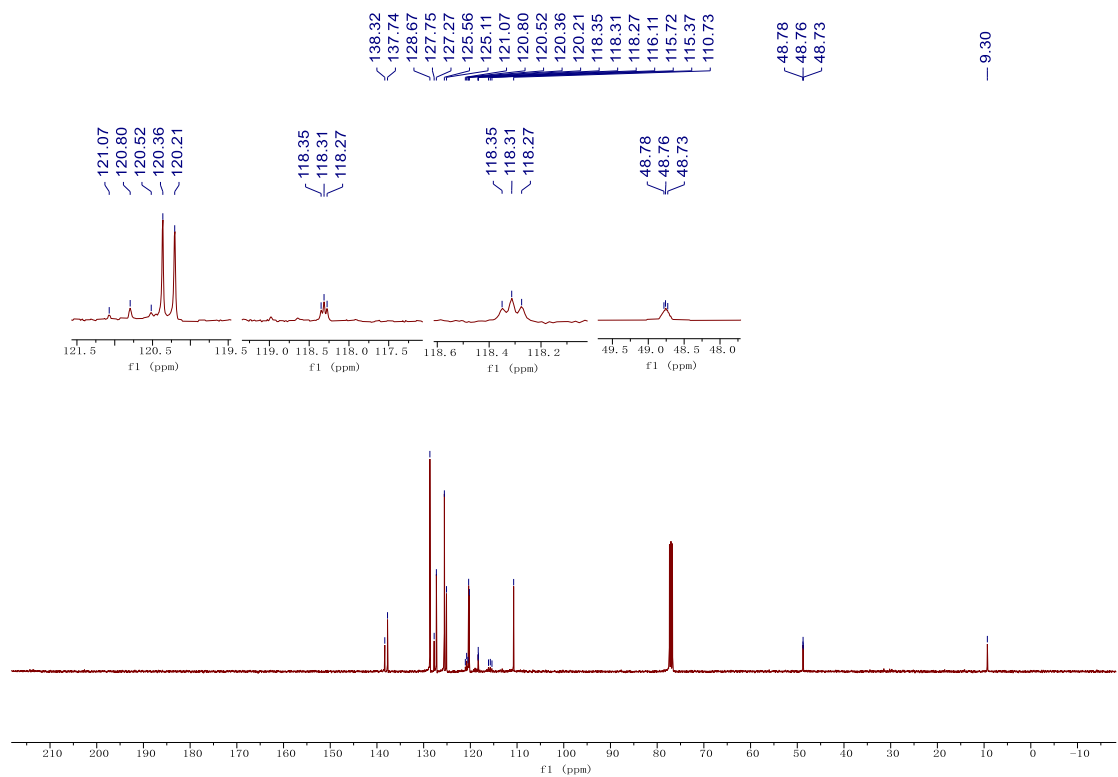

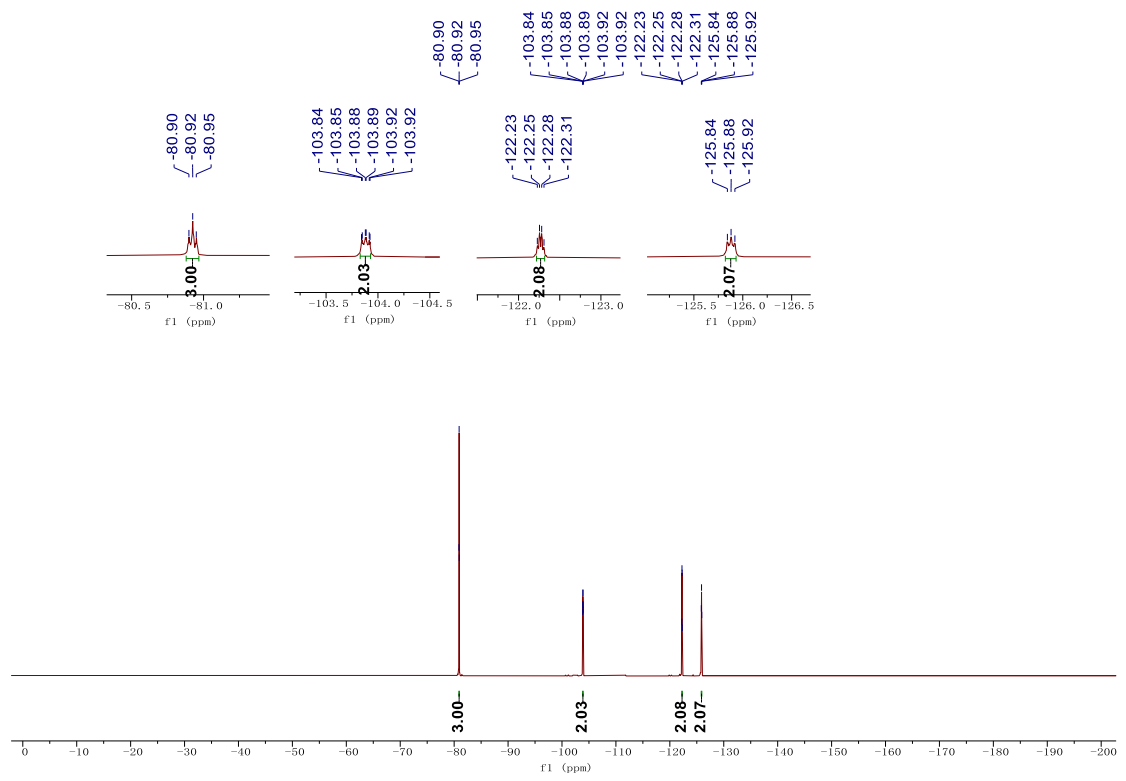

### 3-methyl-2-(perfluorobutyl)-1-phenyl-1H-indole (3t)

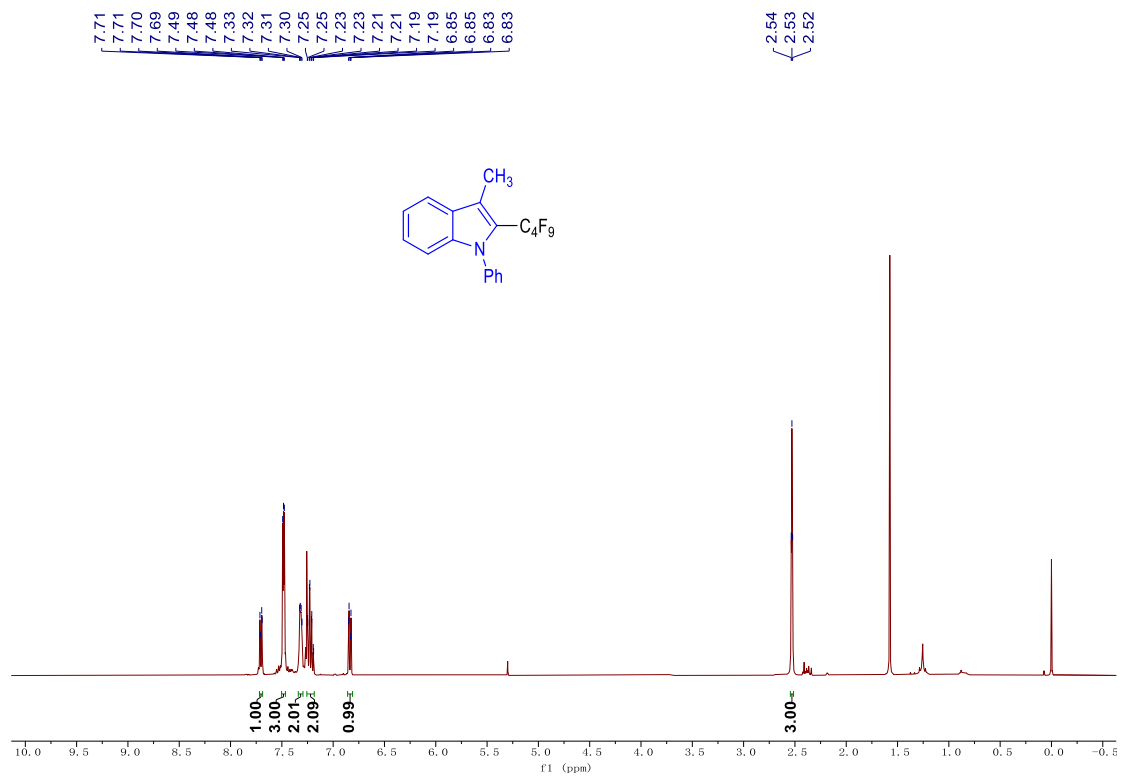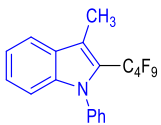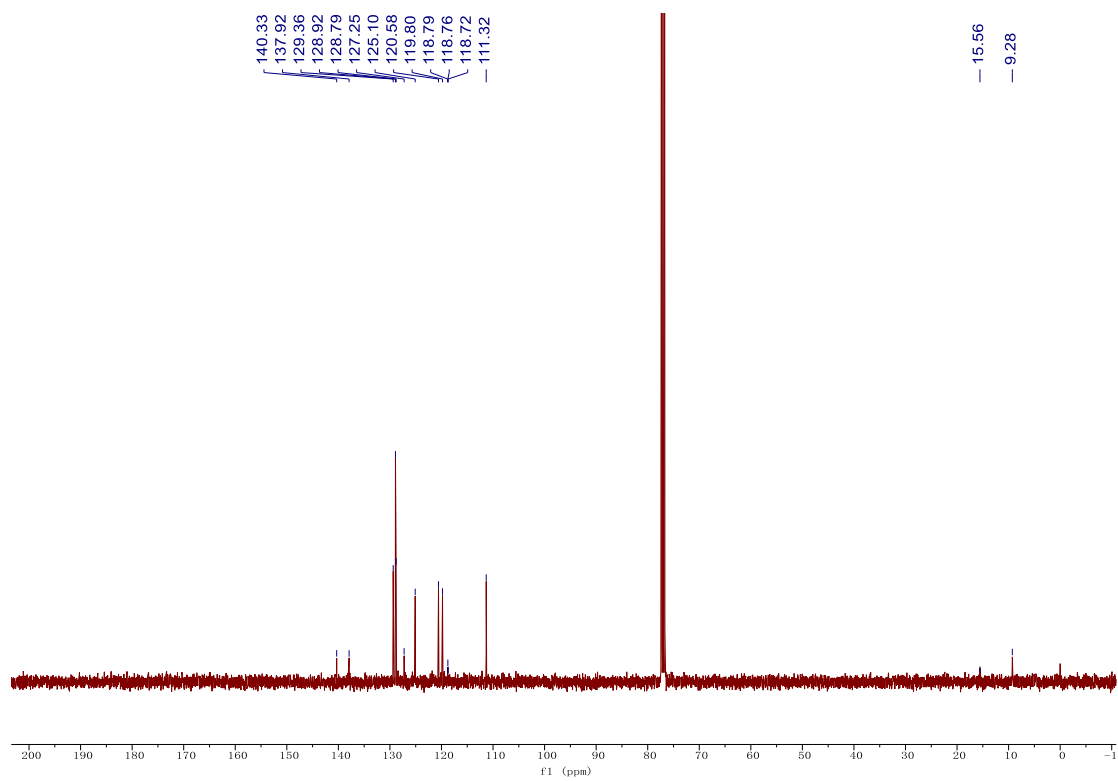

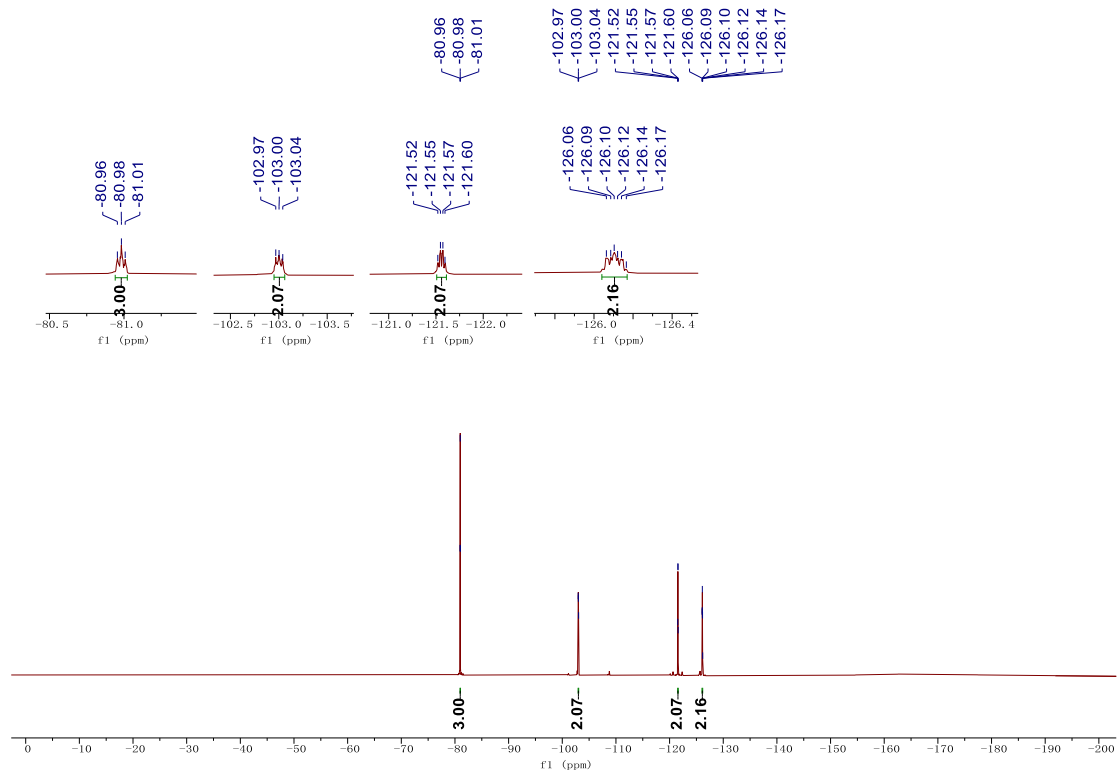

### 3-ethyl-2-(perfluorobutyl)-1H-indole (3u)

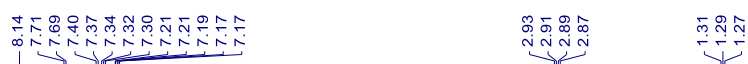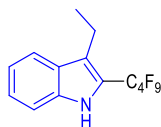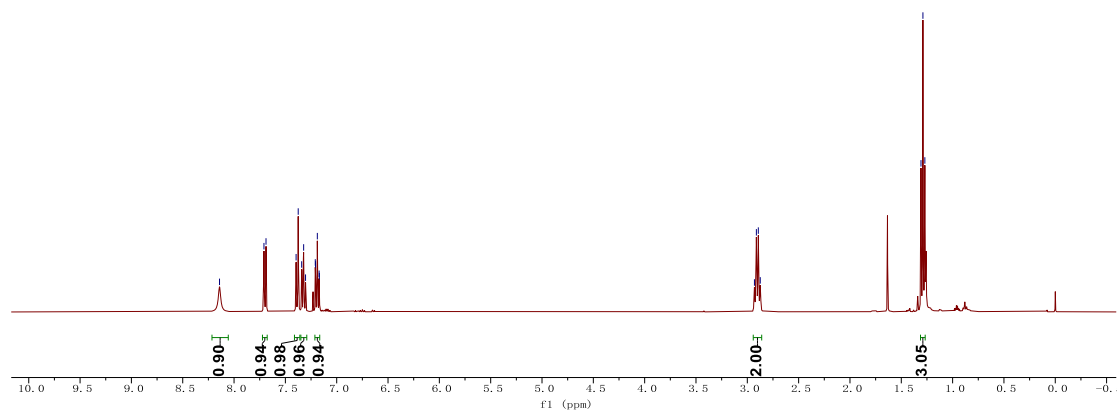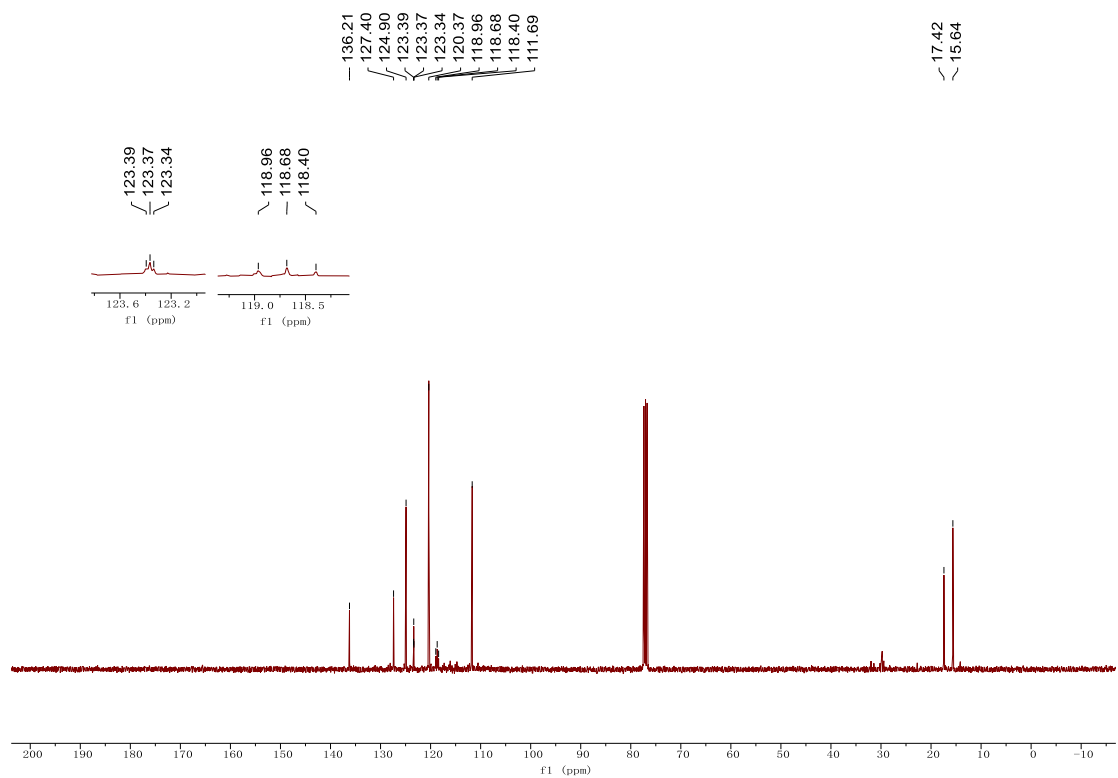

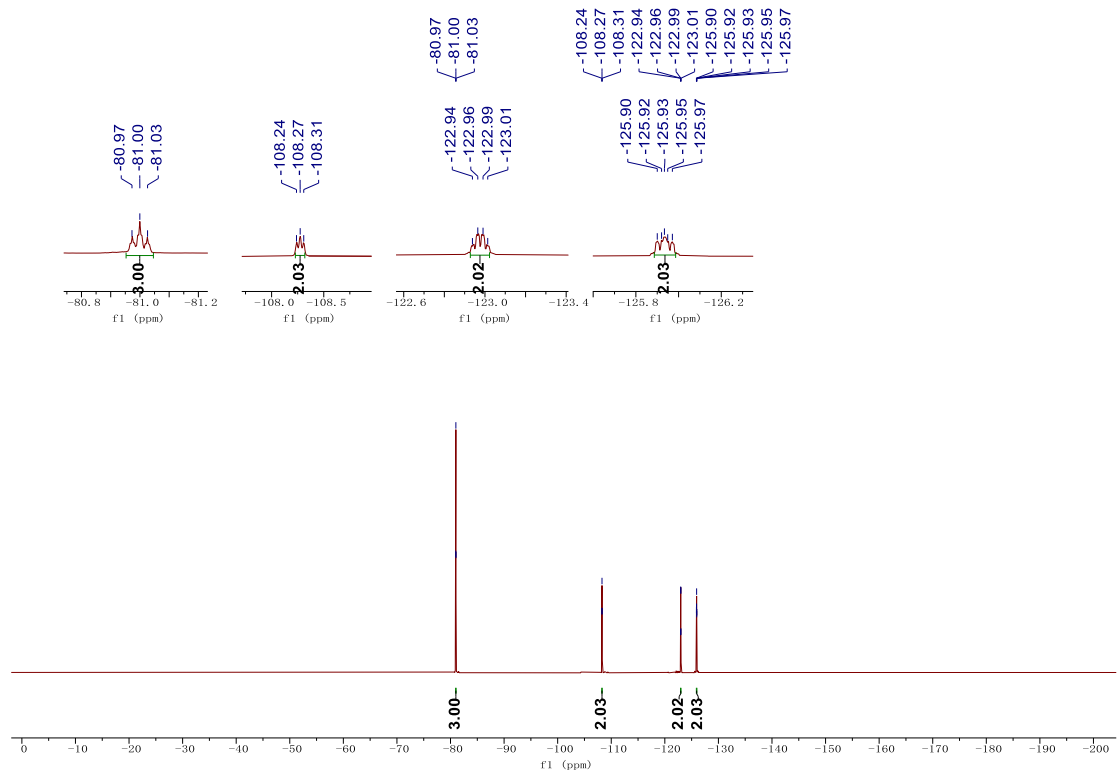

# Methyl 2-(2-(perfluorobutyl)-1H-indol-3-yl)acetate (3v)

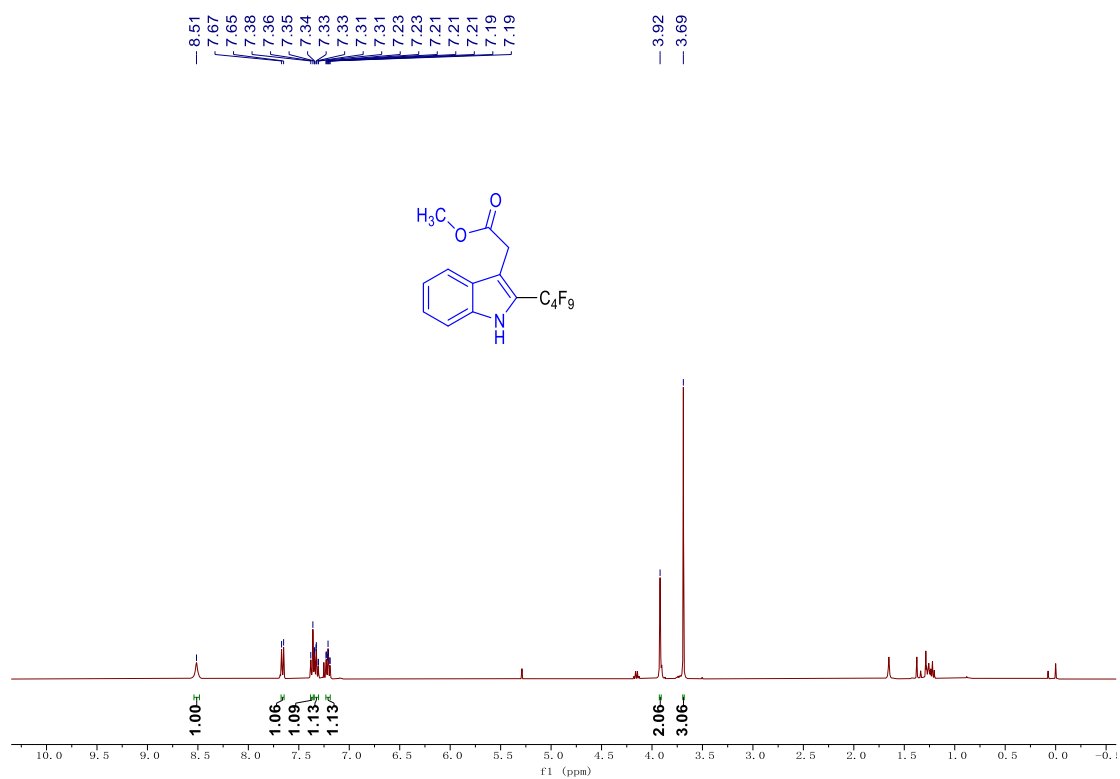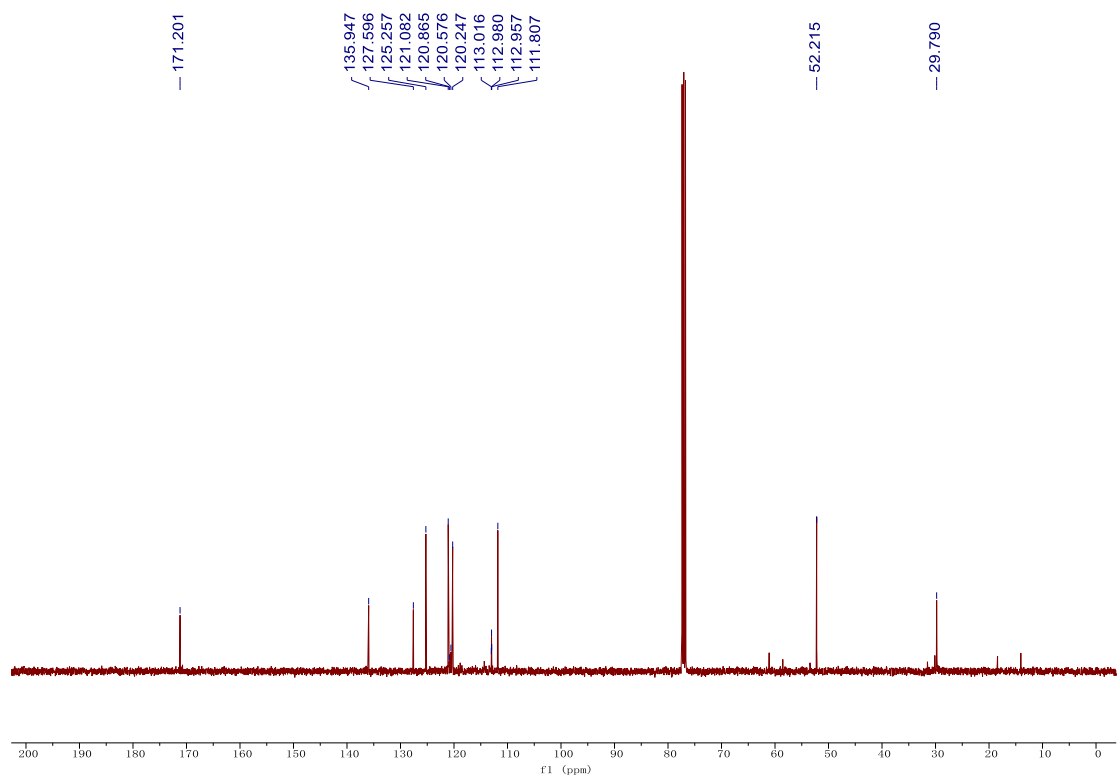



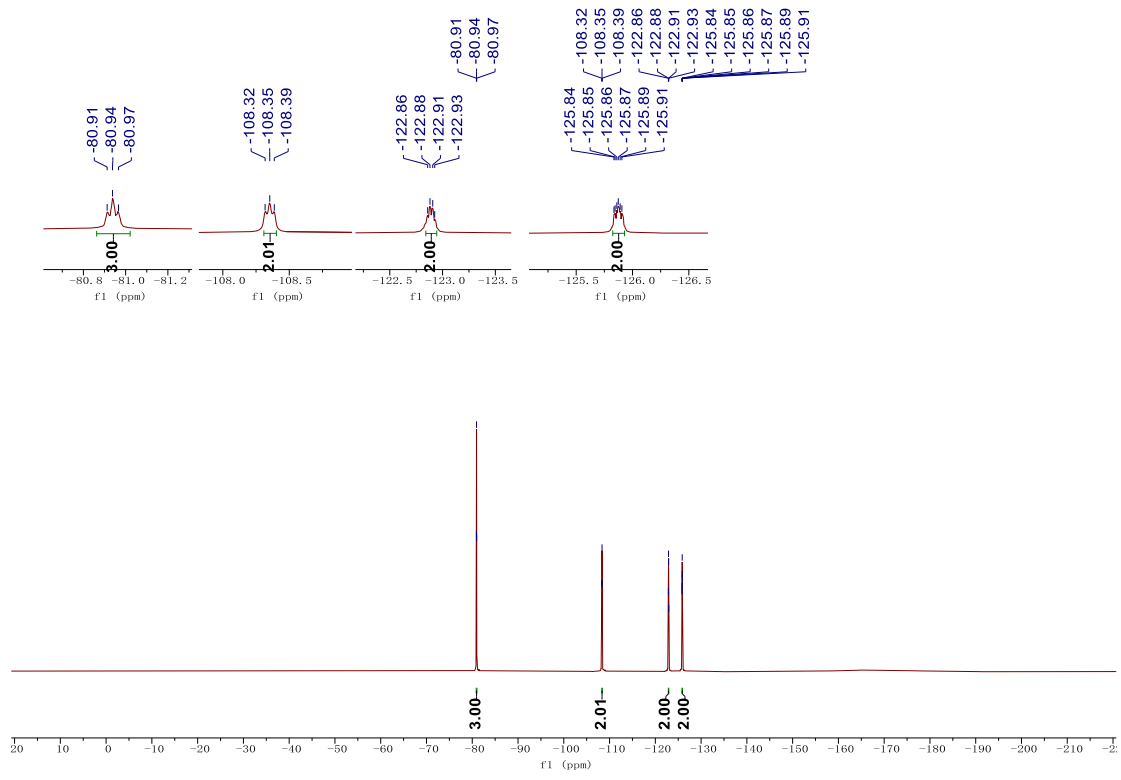

# methyl 3-(2-(perfluorobutyl)-1H-indol-3-yl)propanoate (3w)

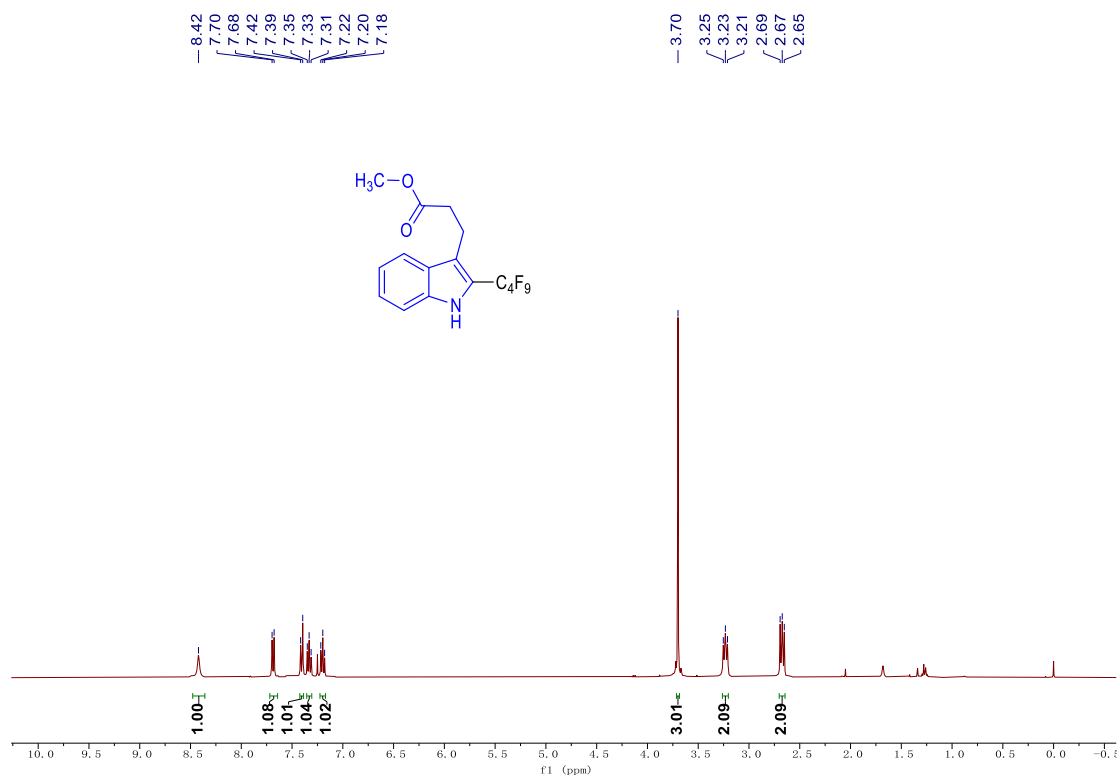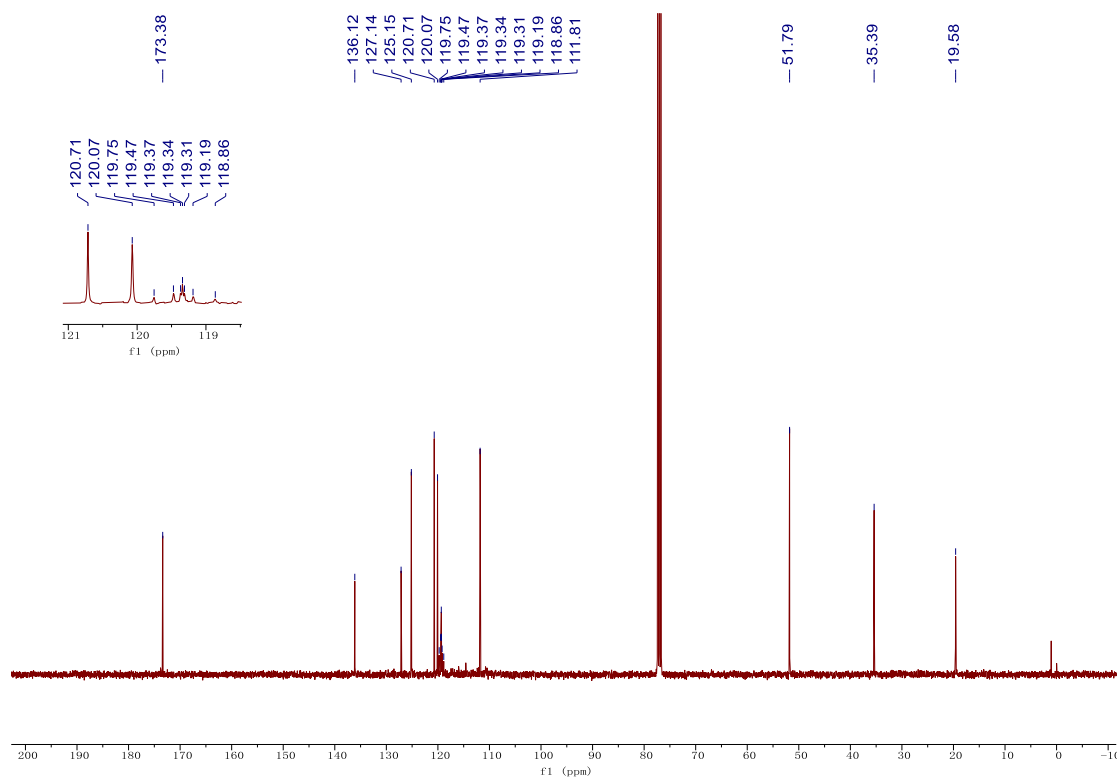

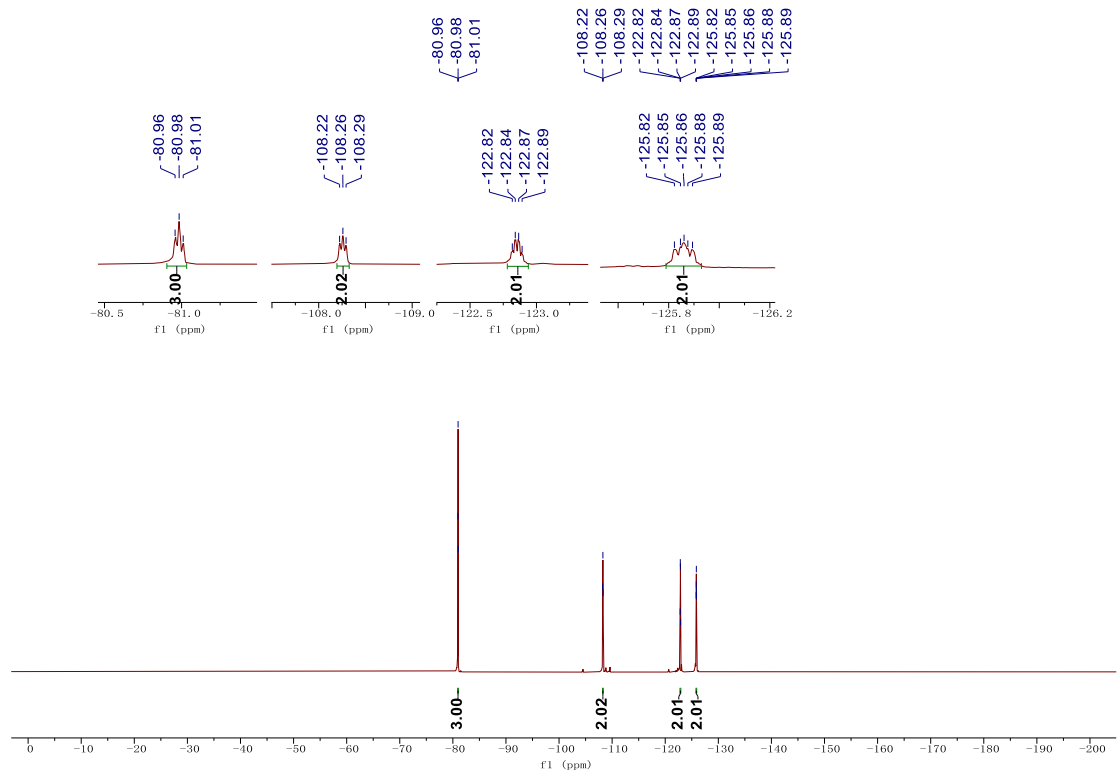

# 2-(perfluorobutyl)-1H-indole-3-carbonitrile (3x)

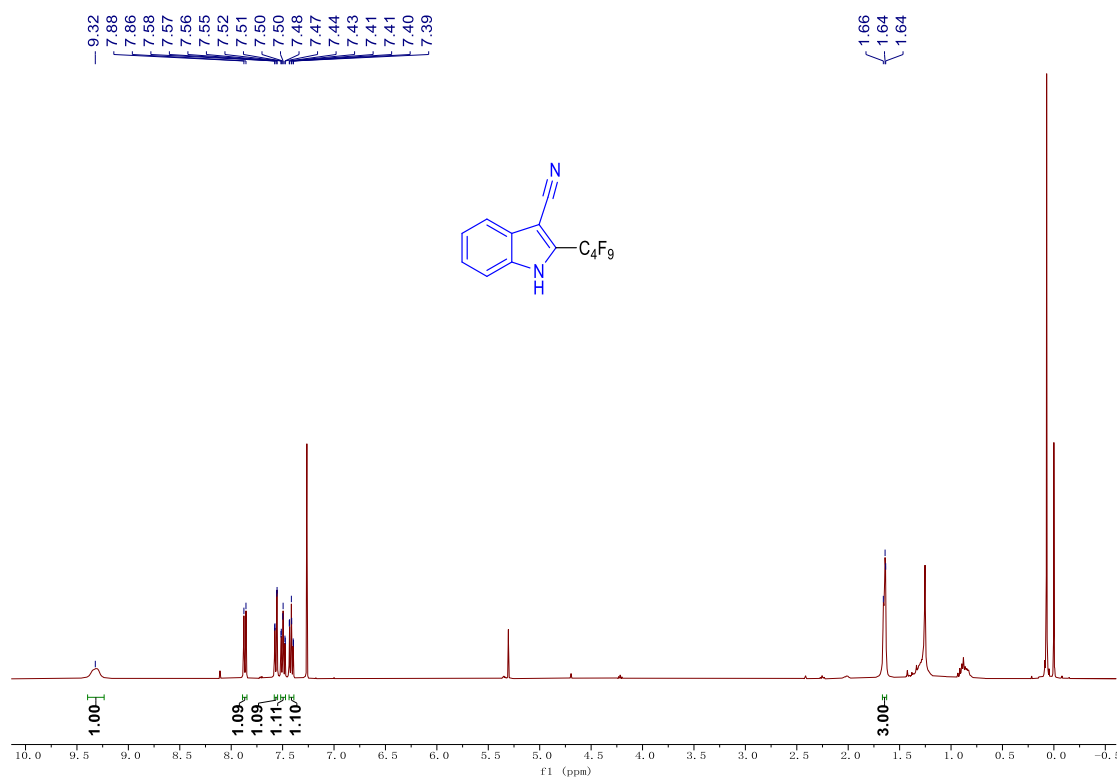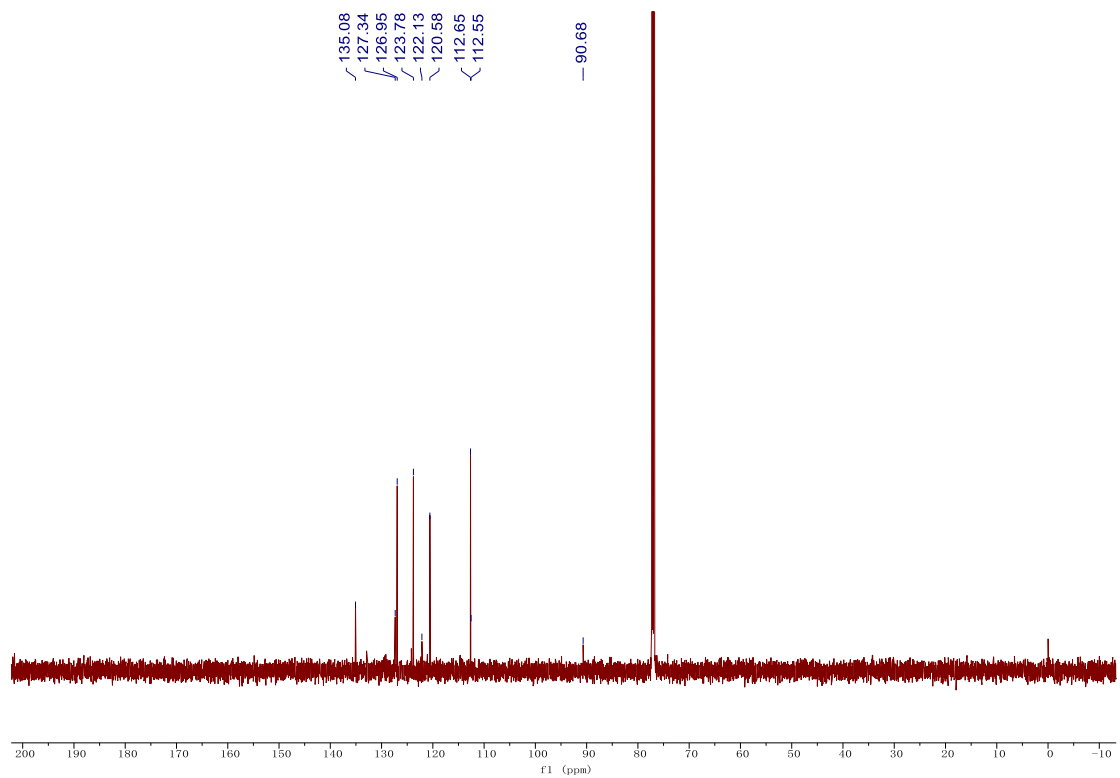

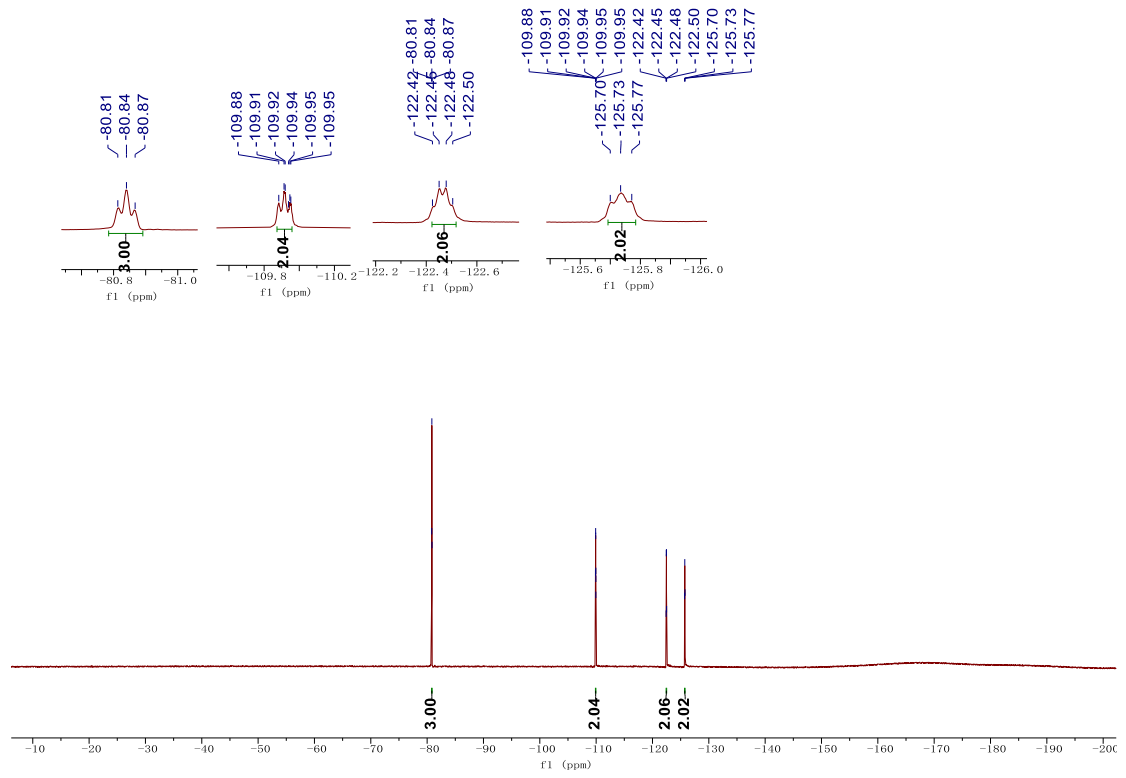

### 3-methyl-2-(trifluoromethyl)-1H-indole (3ba)

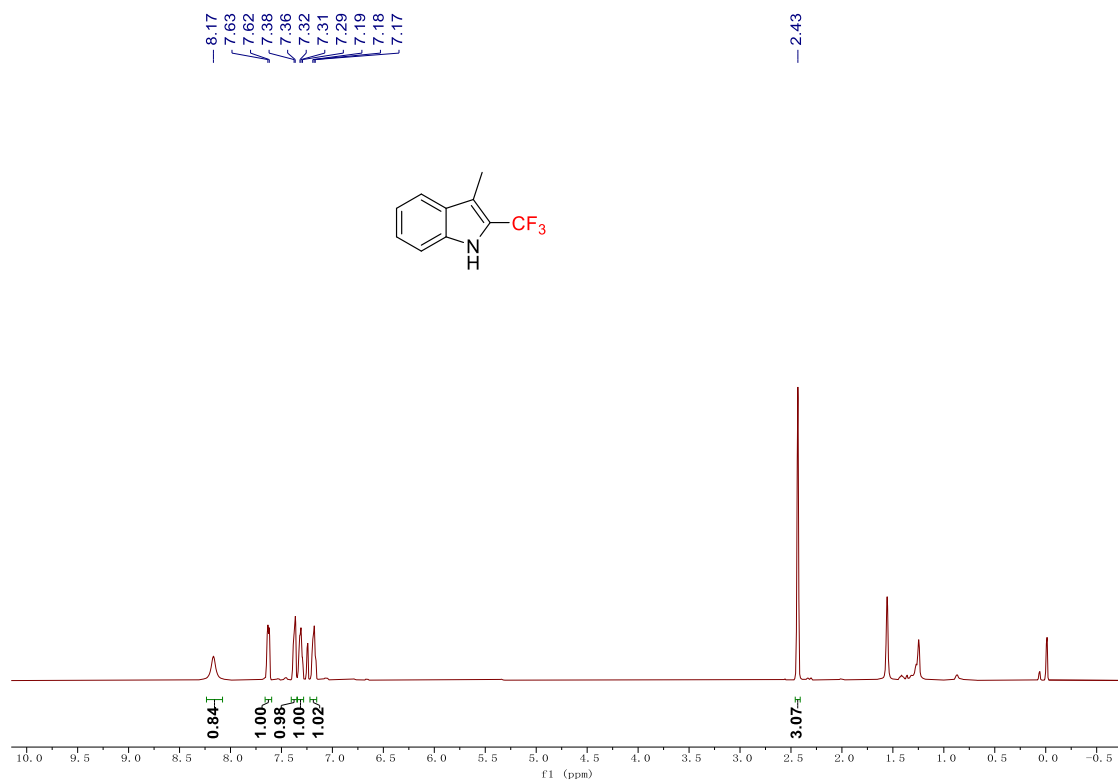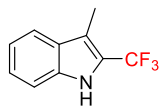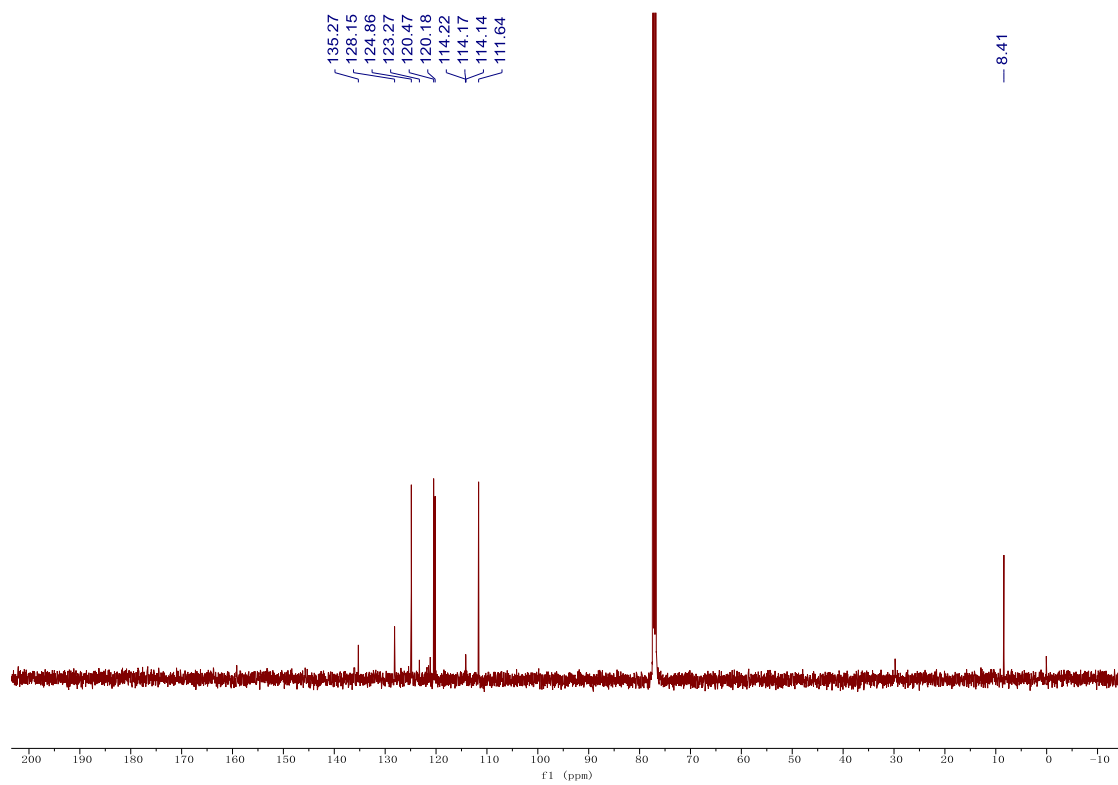

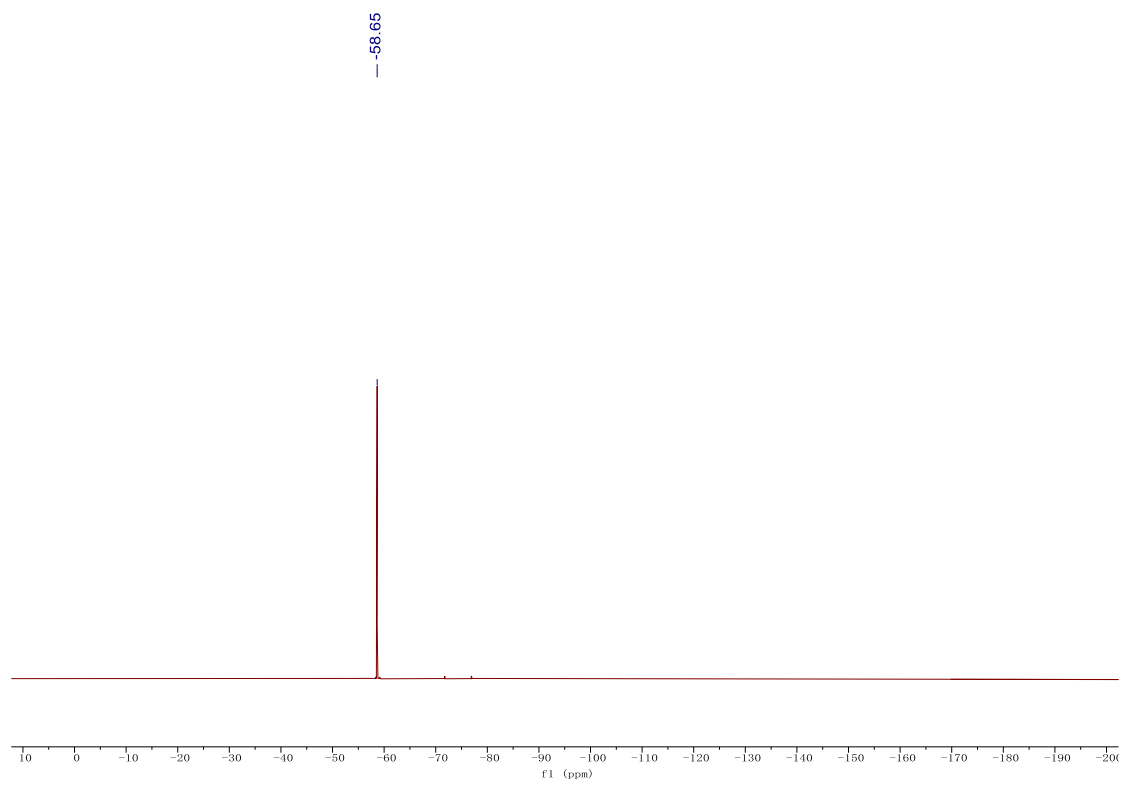

# 2-( perfluorobutyl)-3-methyl-1H-indole (3ca)

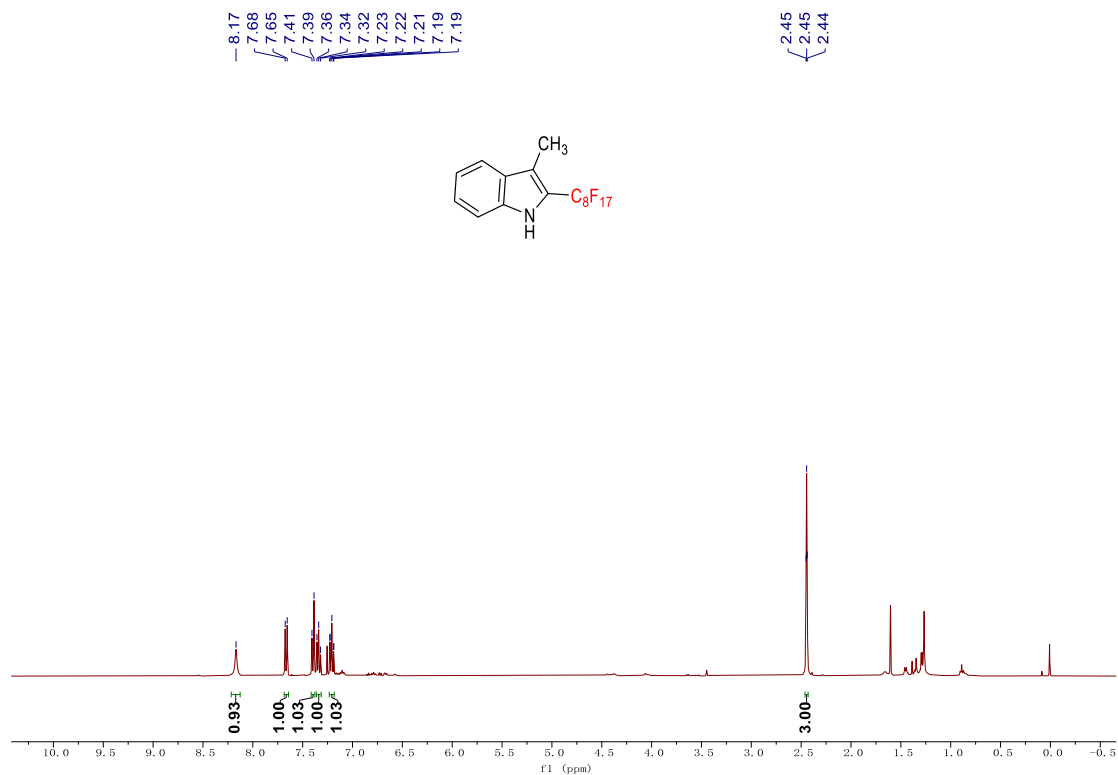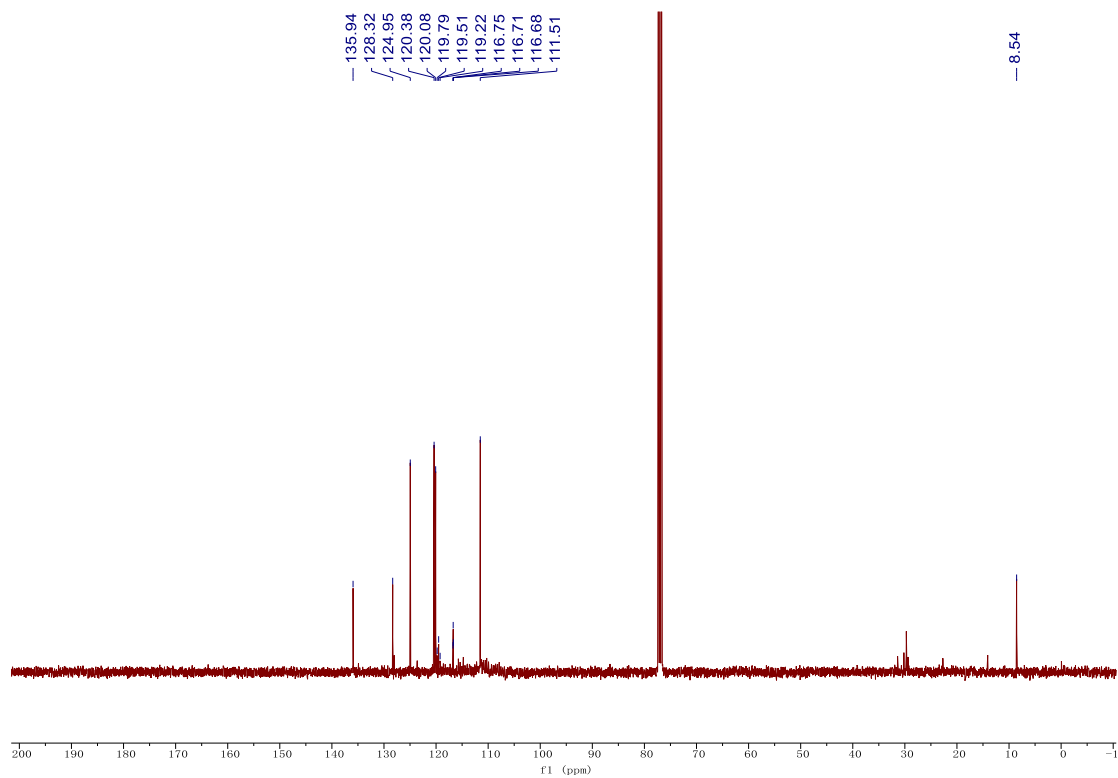



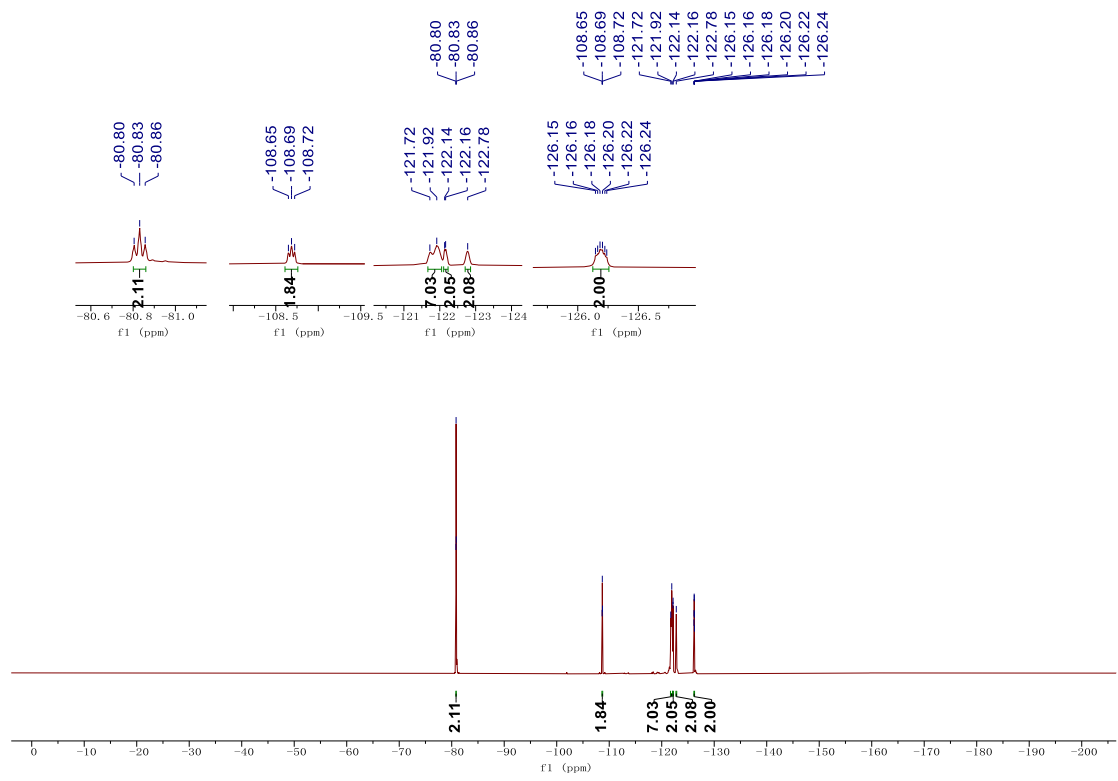

### 3-methyl-2-(perfluoropropan-2-yl)-1H-indole (3da)

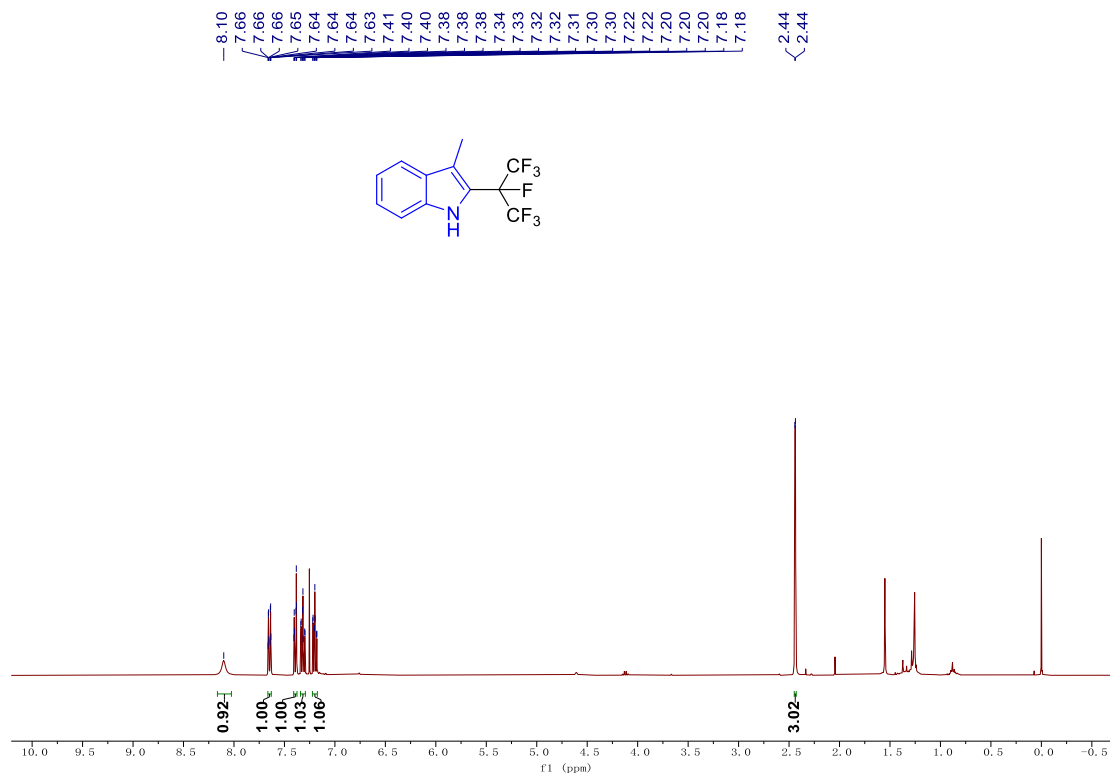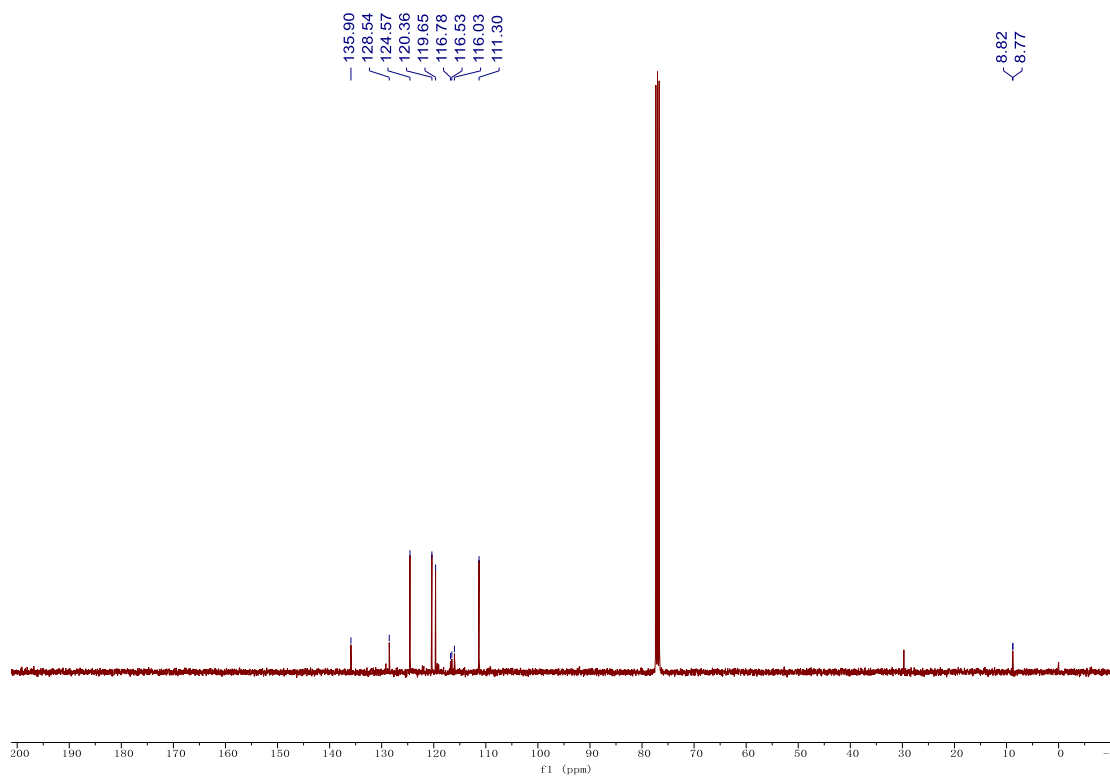

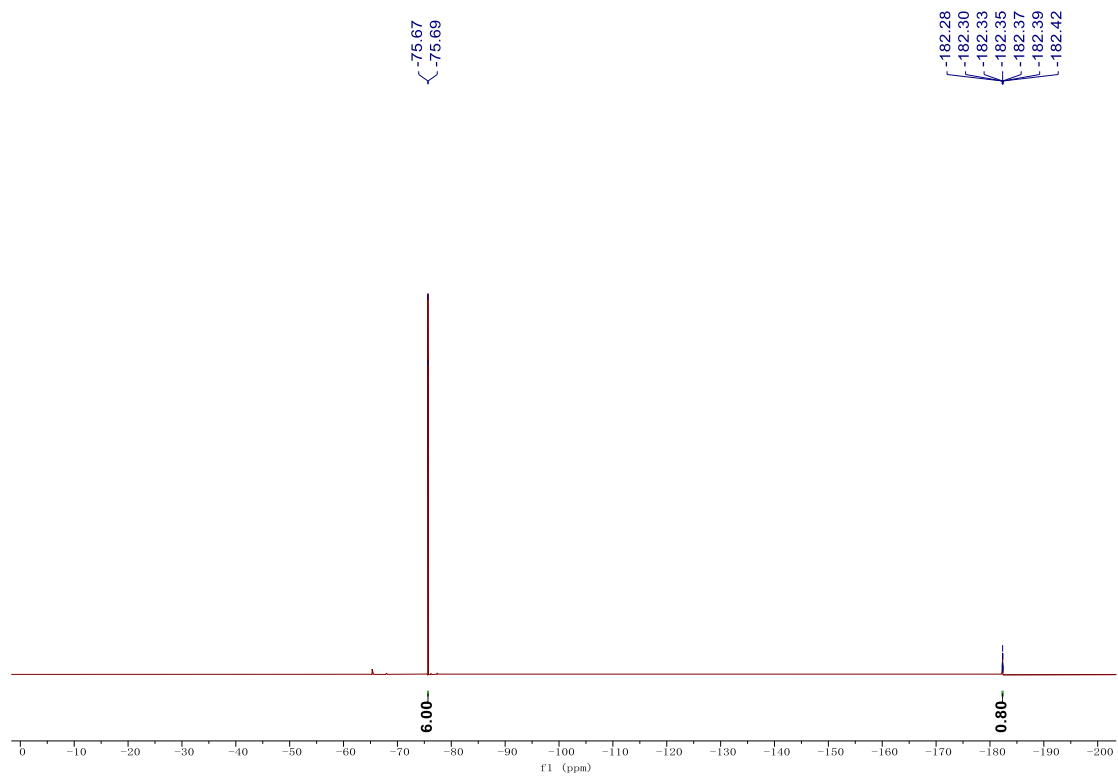

### 3-methyl-2-(perfluorocyclohexyl)-1H-indole (3ea)

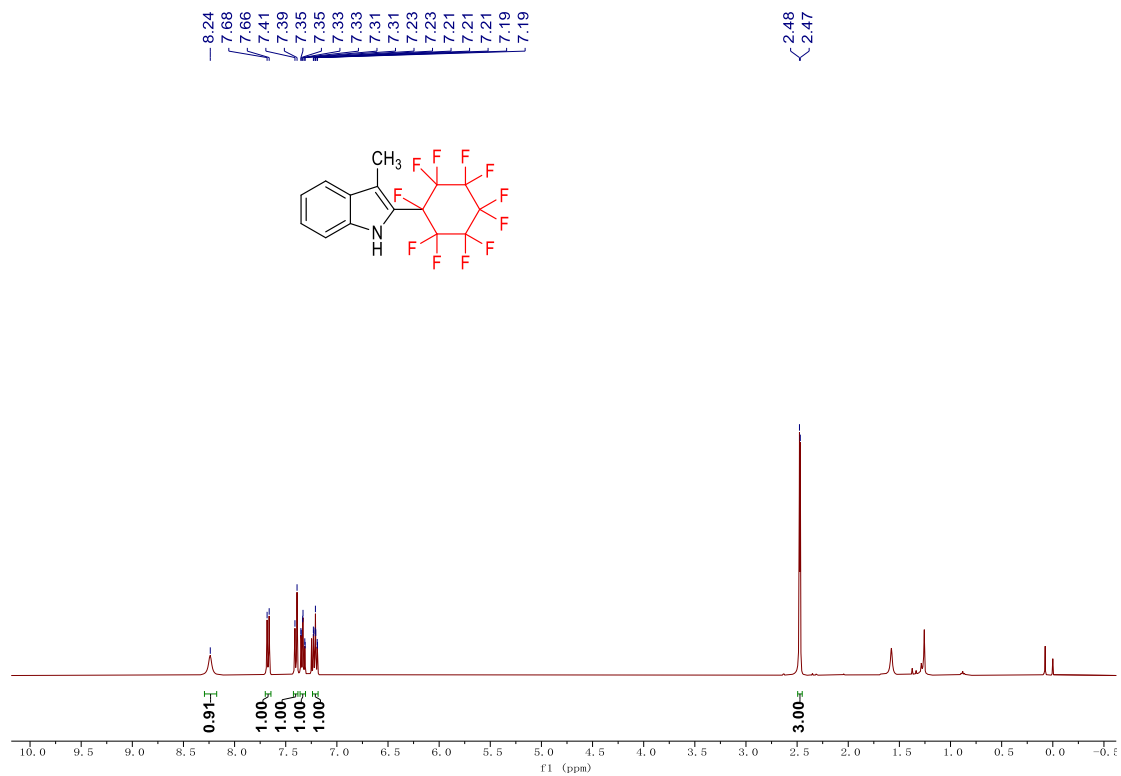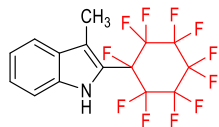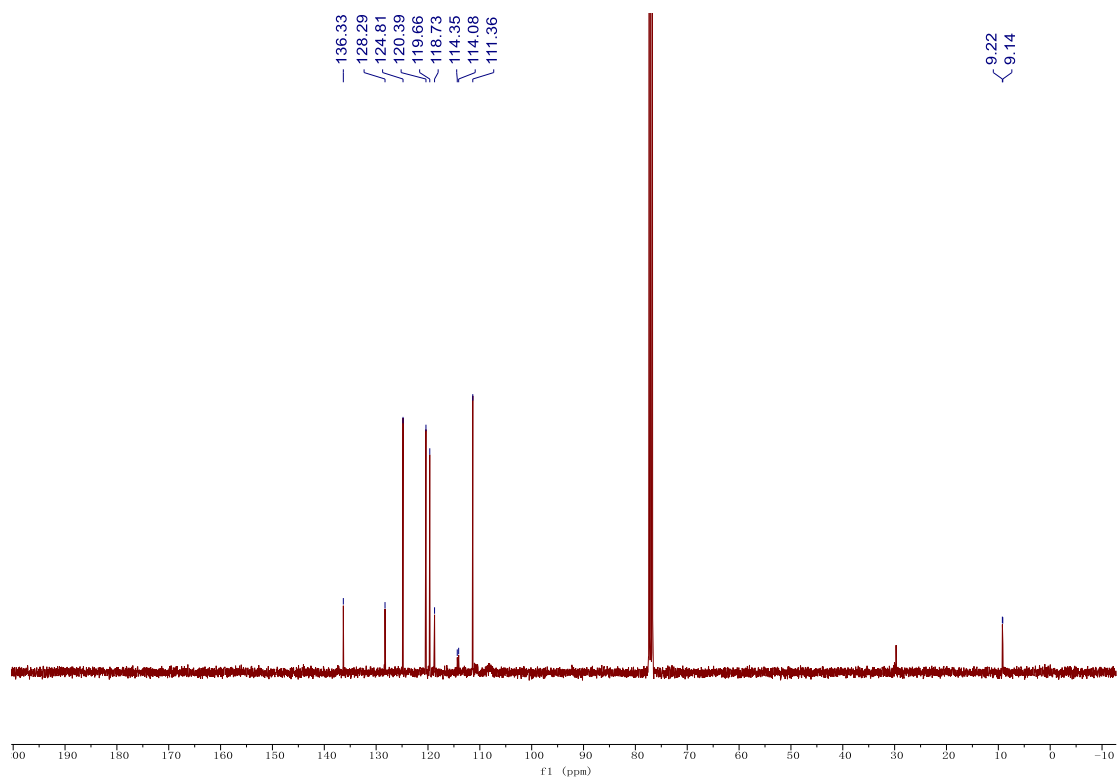

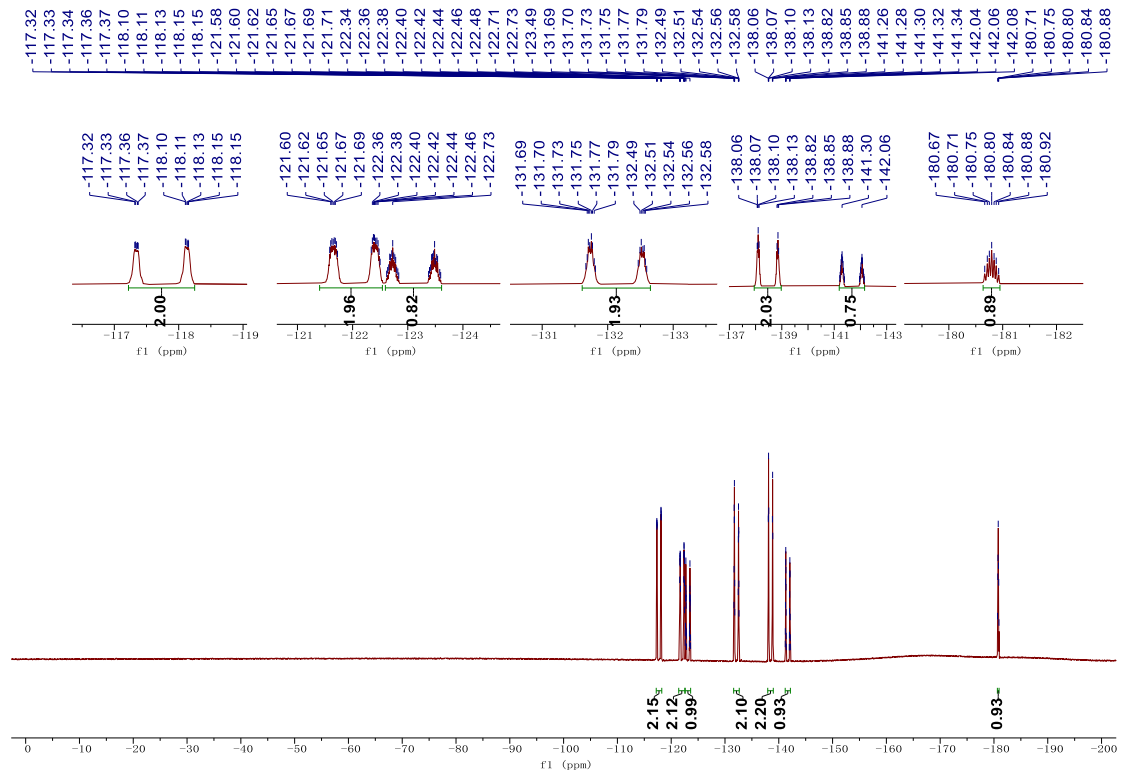

**methyl 2,2-difluoro-2-(3-methyl-1H-indol-2-yl)acetate (3fa)**

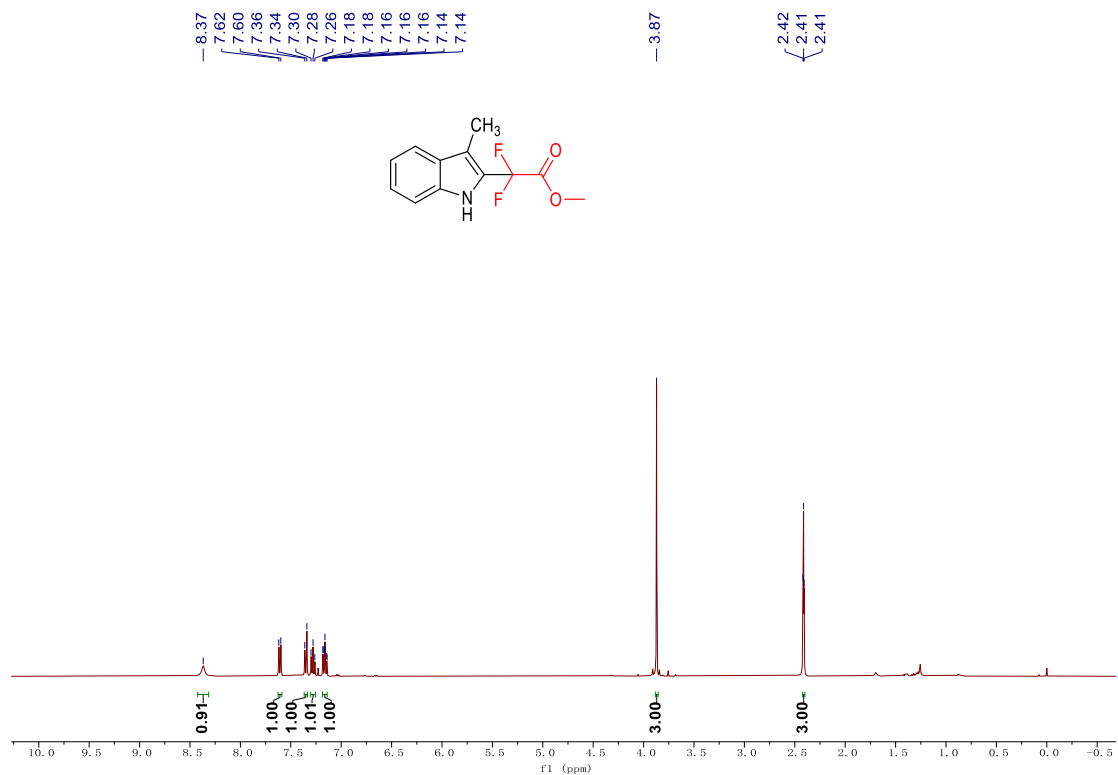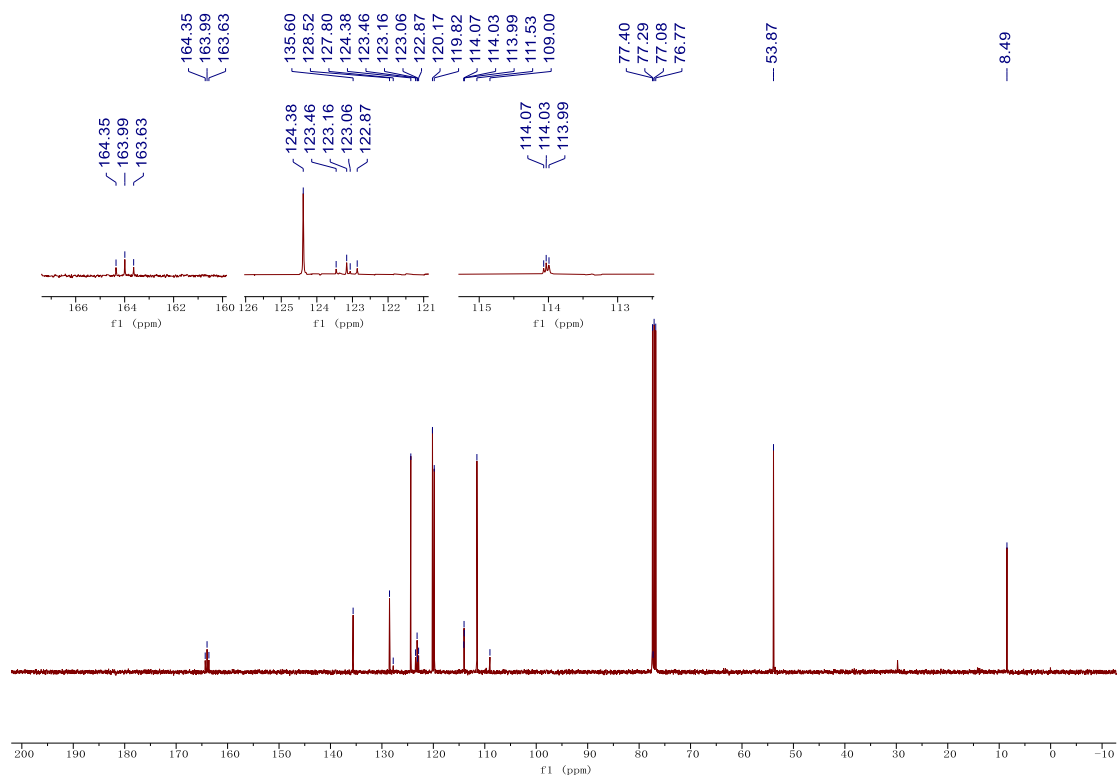

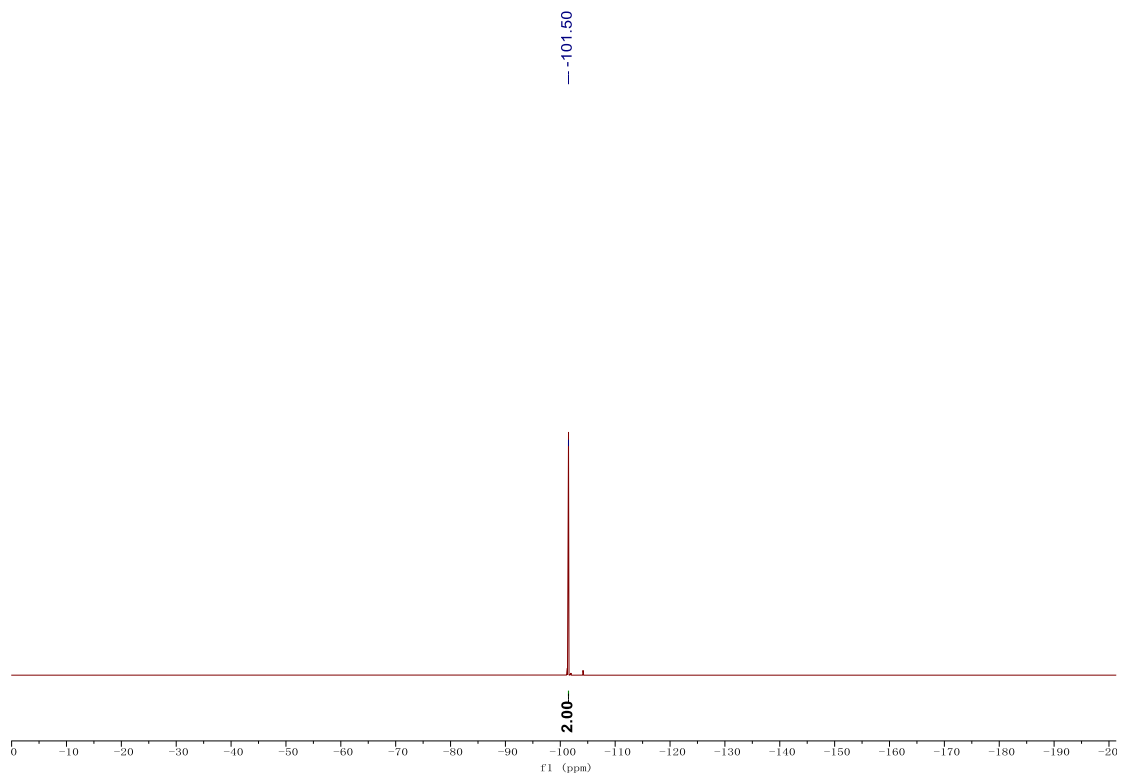

**(S)-5-((3-(2-(dimethylamino)ethyl)-2-(perfluorobutyl)-1H-indol-5-yl)methyl)oxazolidin-2-one (5a)**

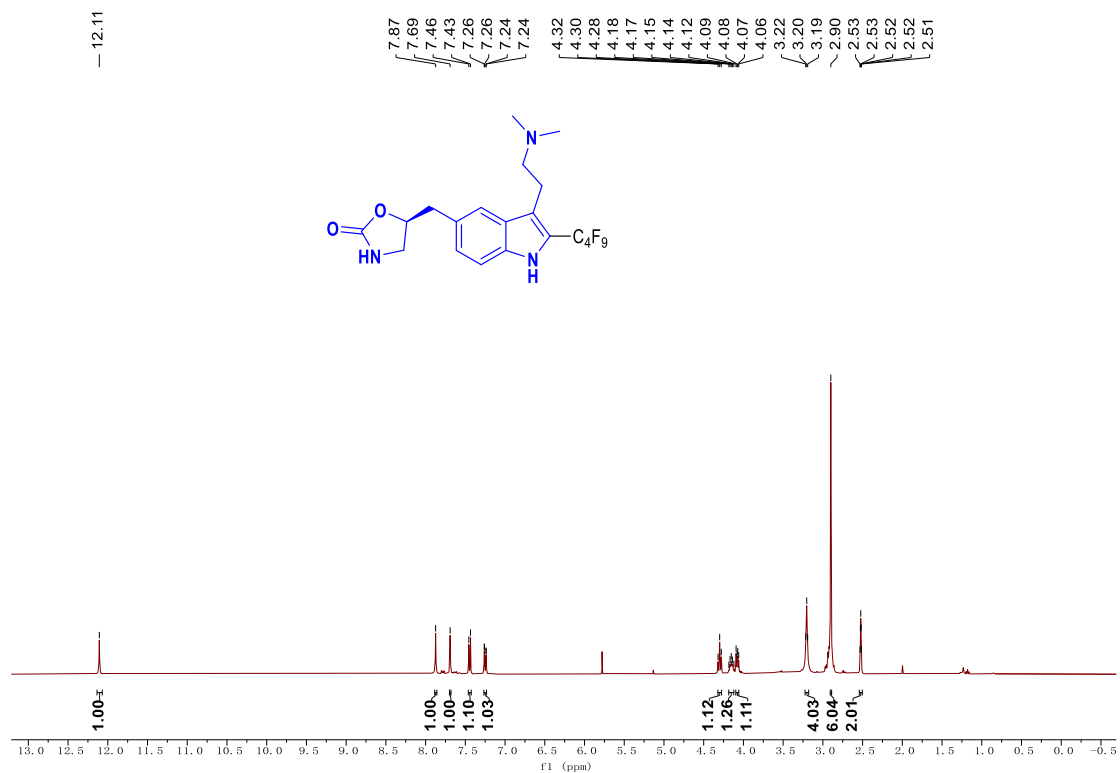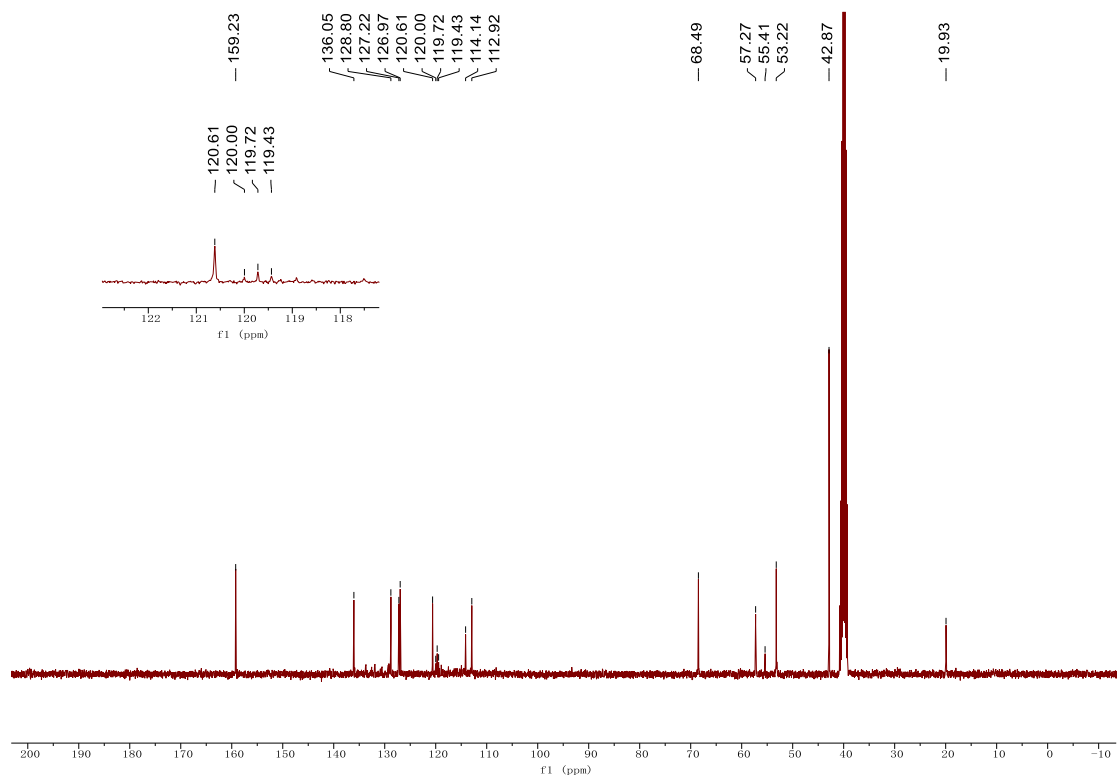



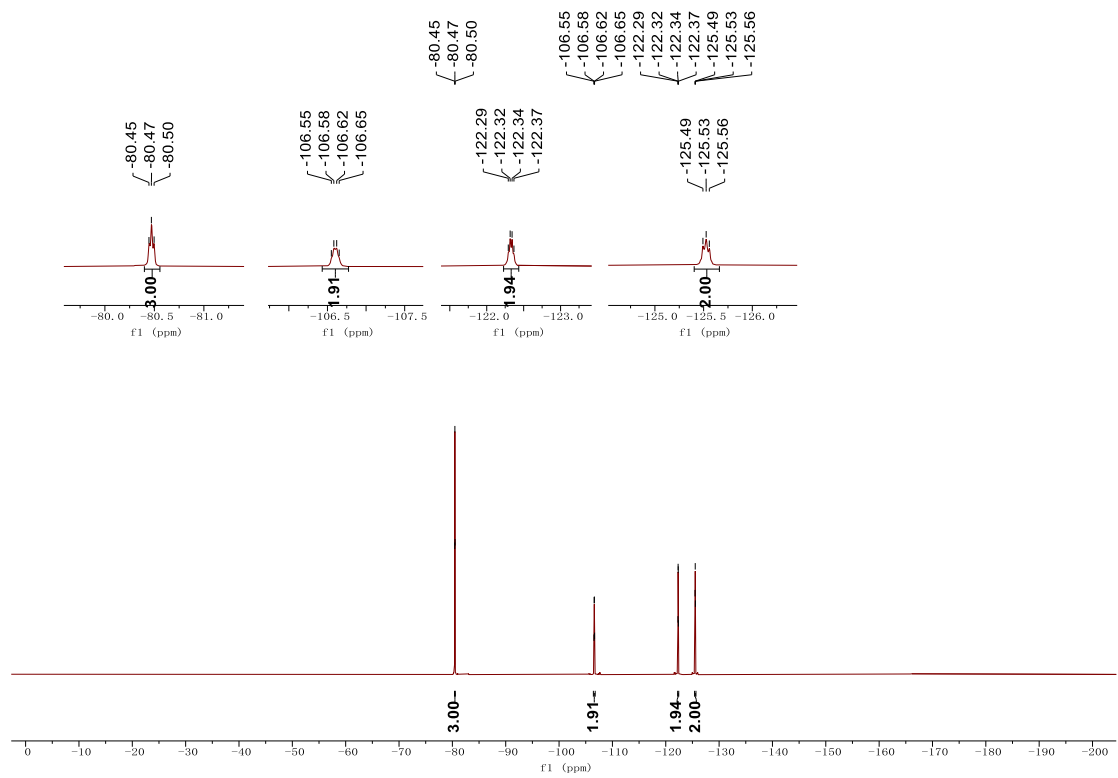

# *N*-(2-(5-methoxy-2-(perfluorobutyl)-1*H*-indol-3-yl)ethyl)acetamide (5b)

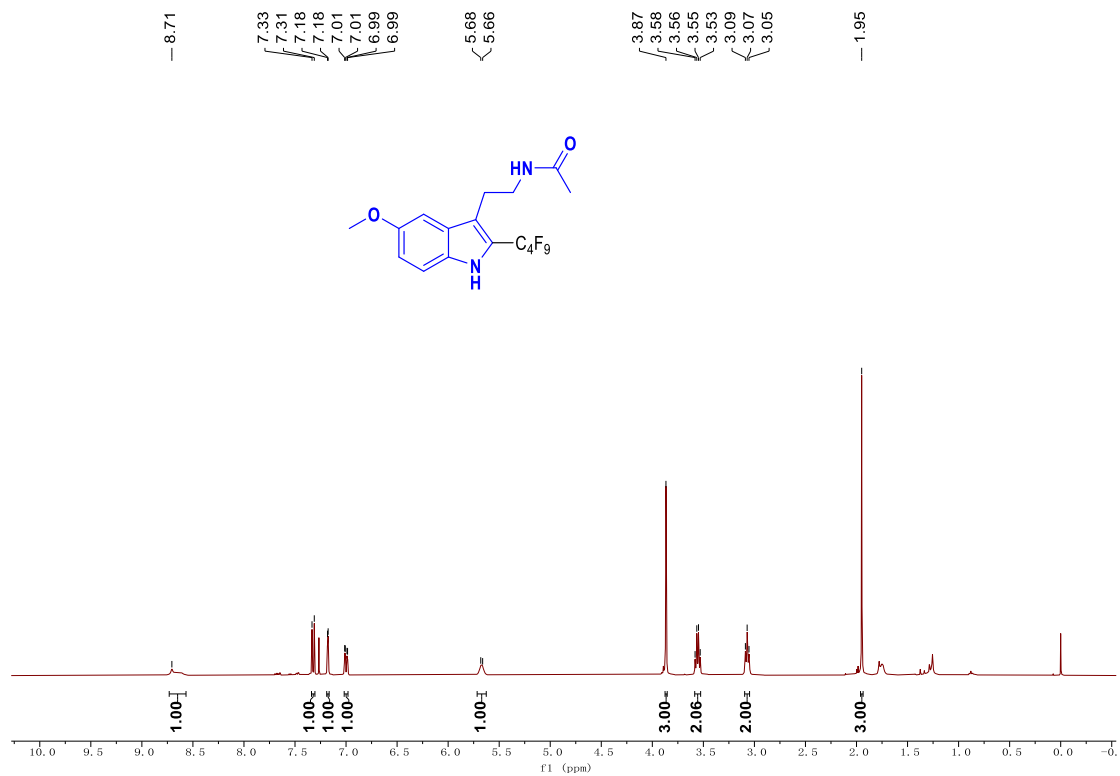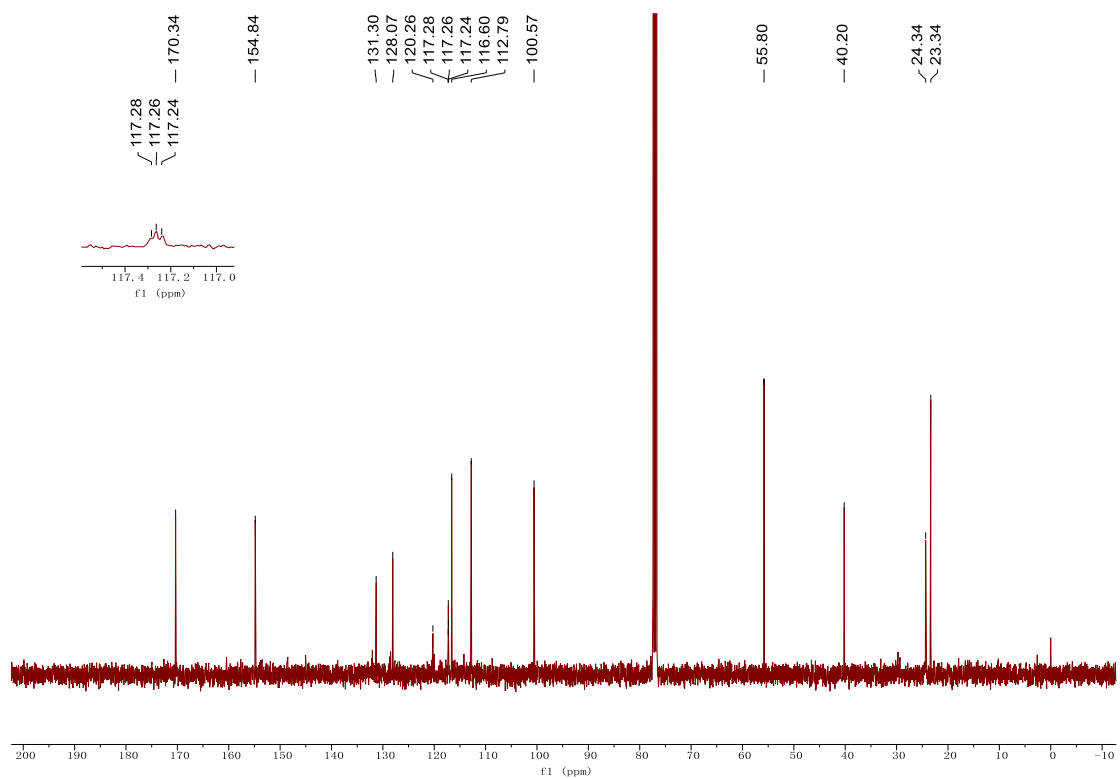

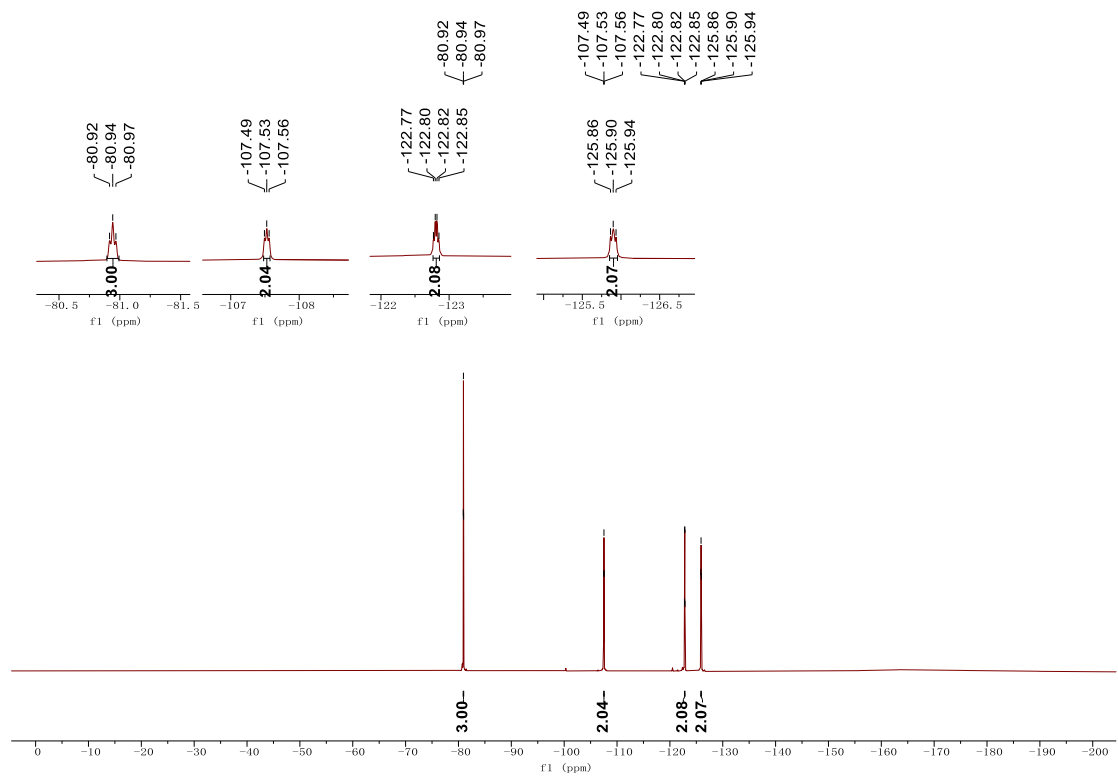

### 3,7-dimethyloct-6-en-1-yl-2-(2-(perfluorobutyl)-1H-indol-3-yl)acetate (5c)

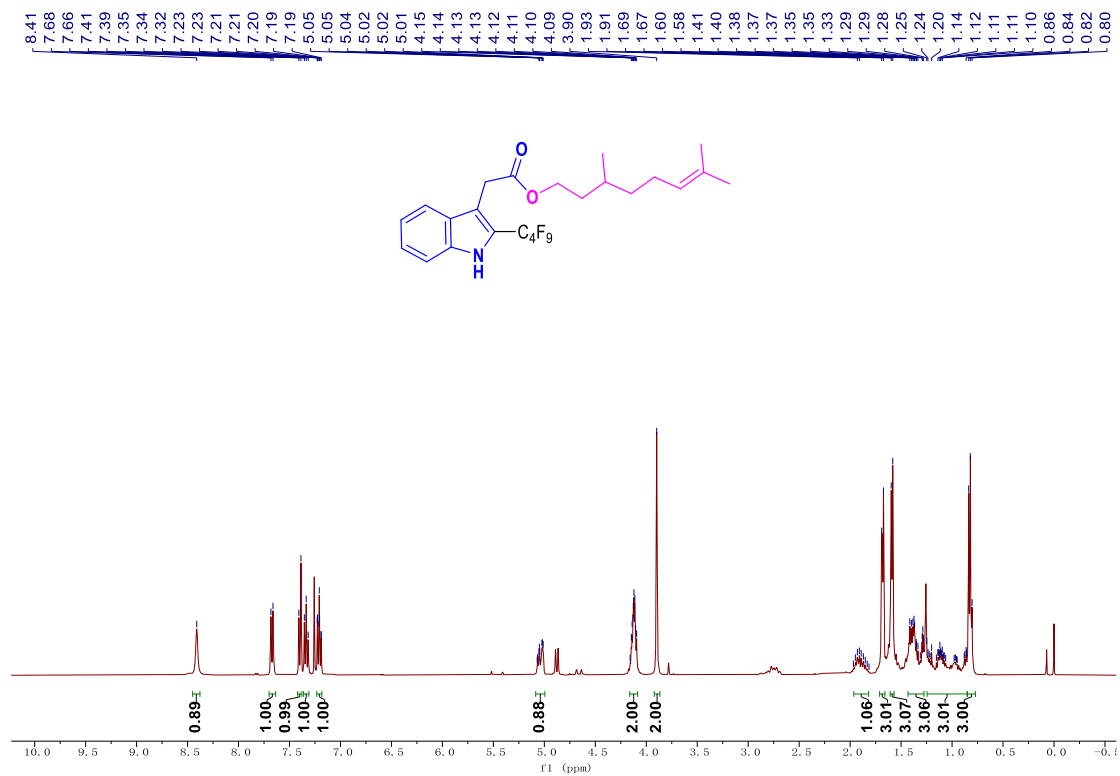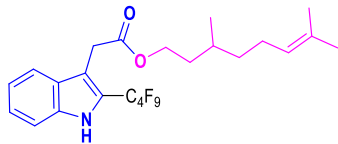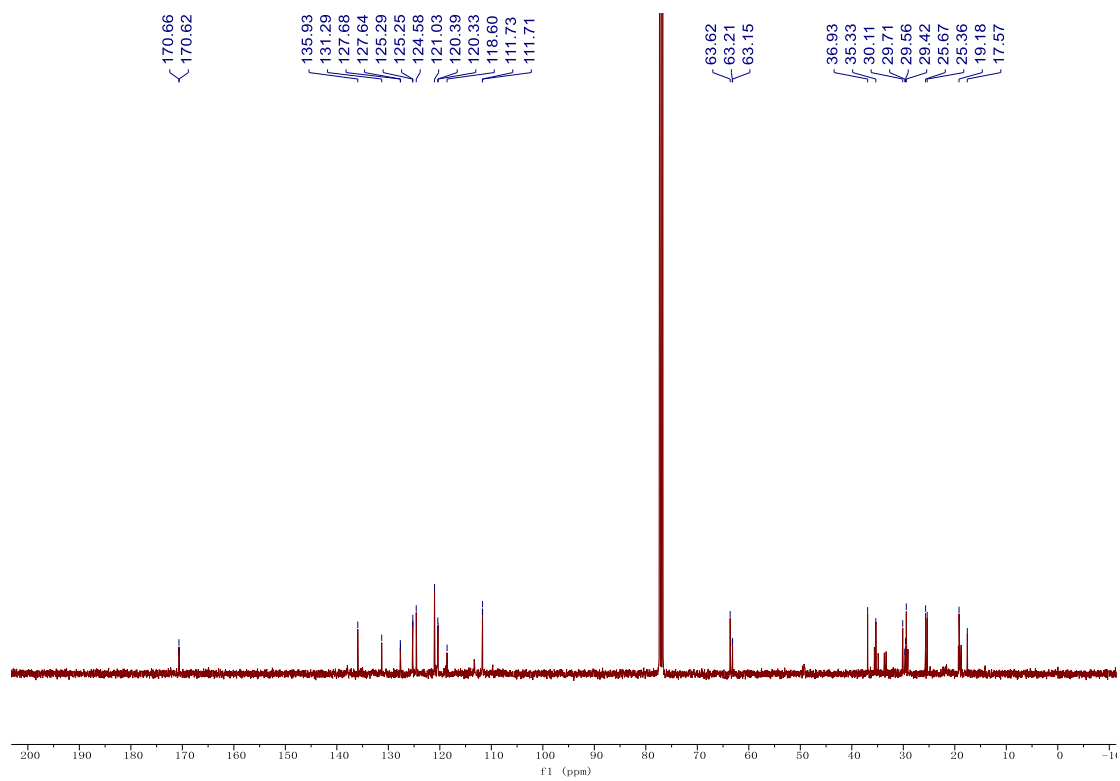

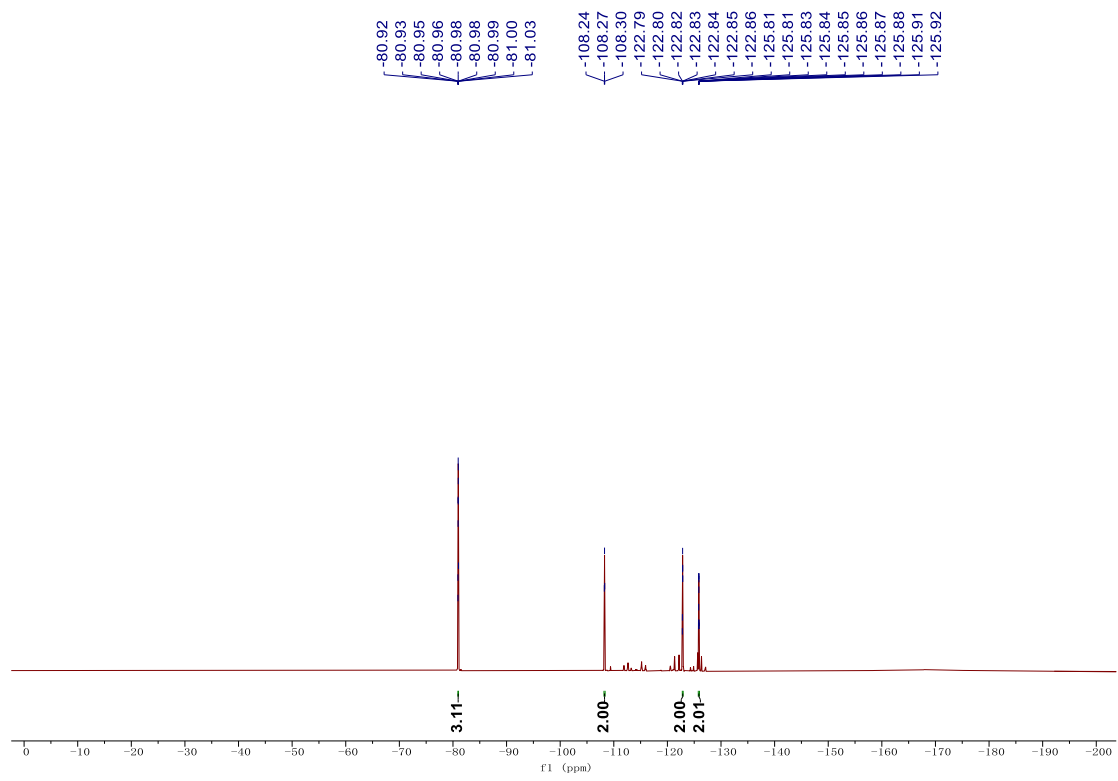

**((3*aS*,5*S*,5*aS*,8*aR*,8*bS*)-2,2,7,7-tetramethyltetrahydro-5H-bis([1,3]dioxolo)[4,5-*b*:4',5'-*d*]pyran-5-yl)methyl-2-(2-(perfluorobutyl)-1H-indol-3-yl)acetate (5d)**

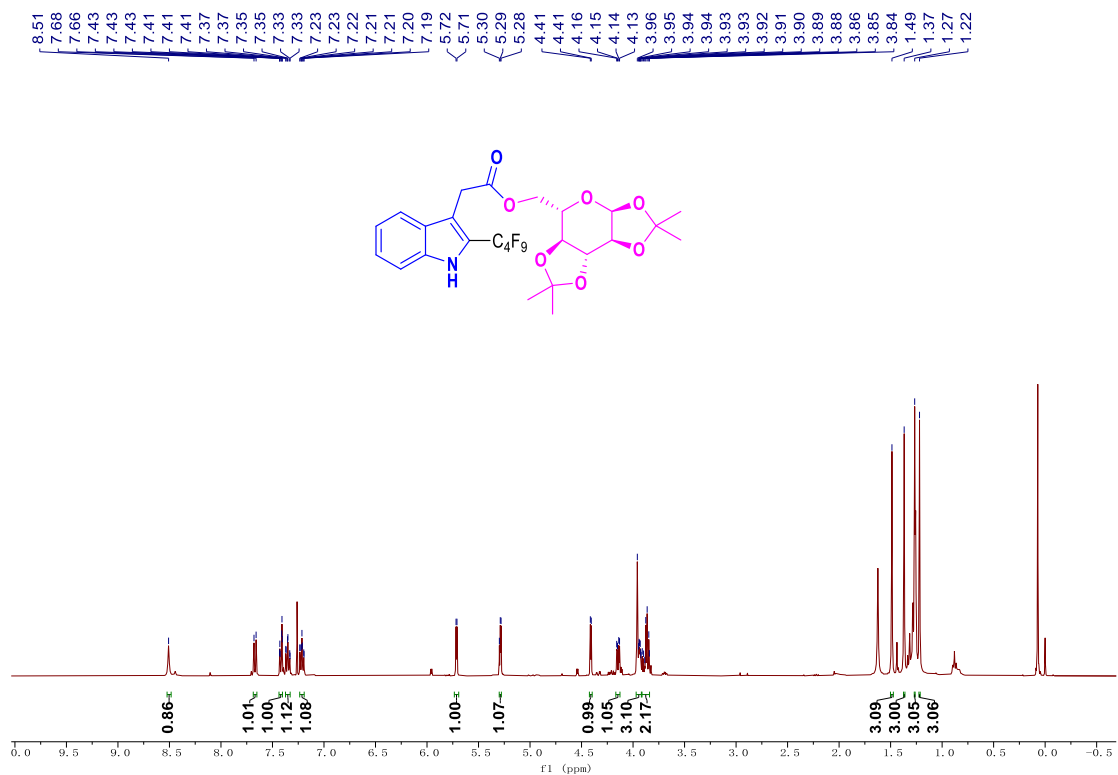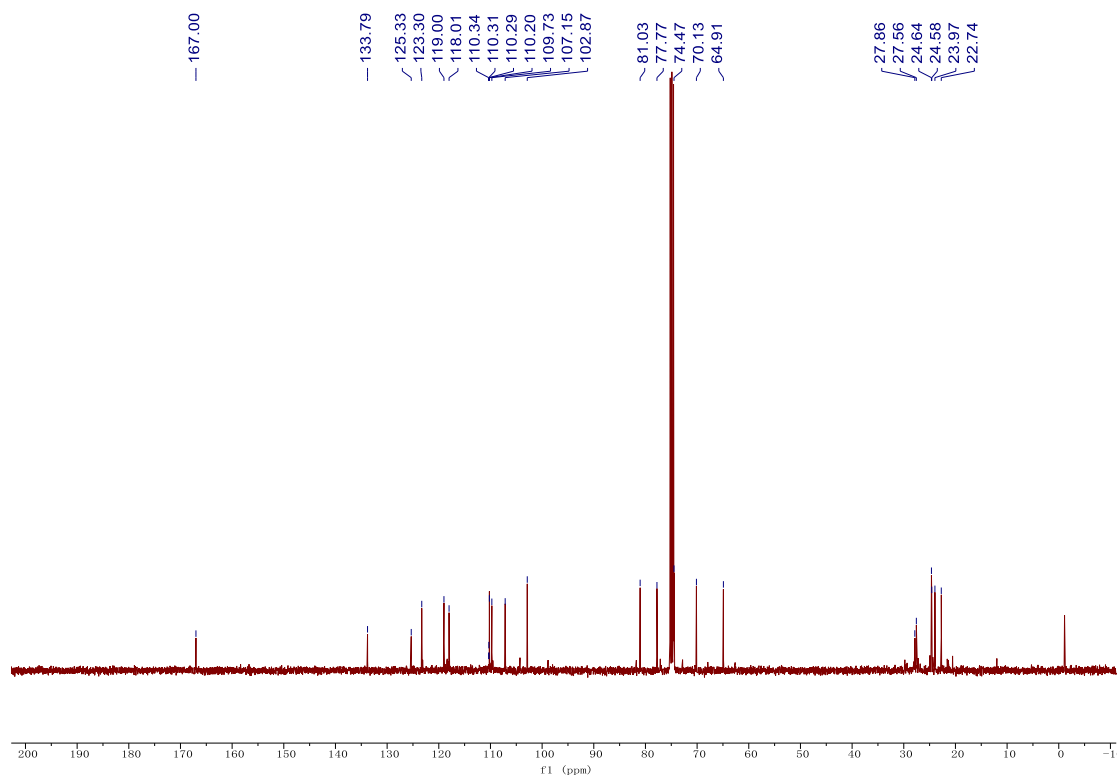

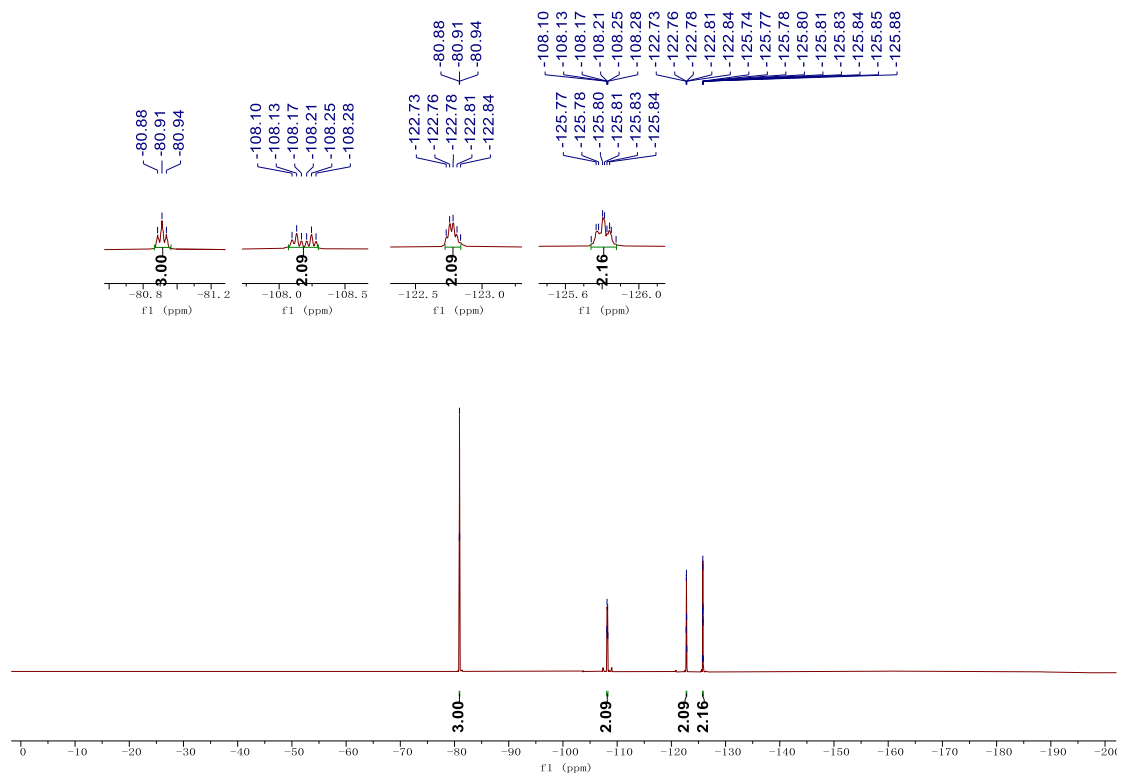

**(3*S*,8*S*,9*S*,10*R*,13*R*,14*S*,17*R*)-10,13-dimethyl-17-((*R*)-6-methylheptan-2-yl)-2,3,4,7,8,9,10,11,12,13,14,15,16,17-tetradecahydro-1*H*-cyclopenta[*a*]phenanthren-3-yl 2-(2-(perfluorobutyl)-1*H*-indol-3-yl)acetate (5e)**

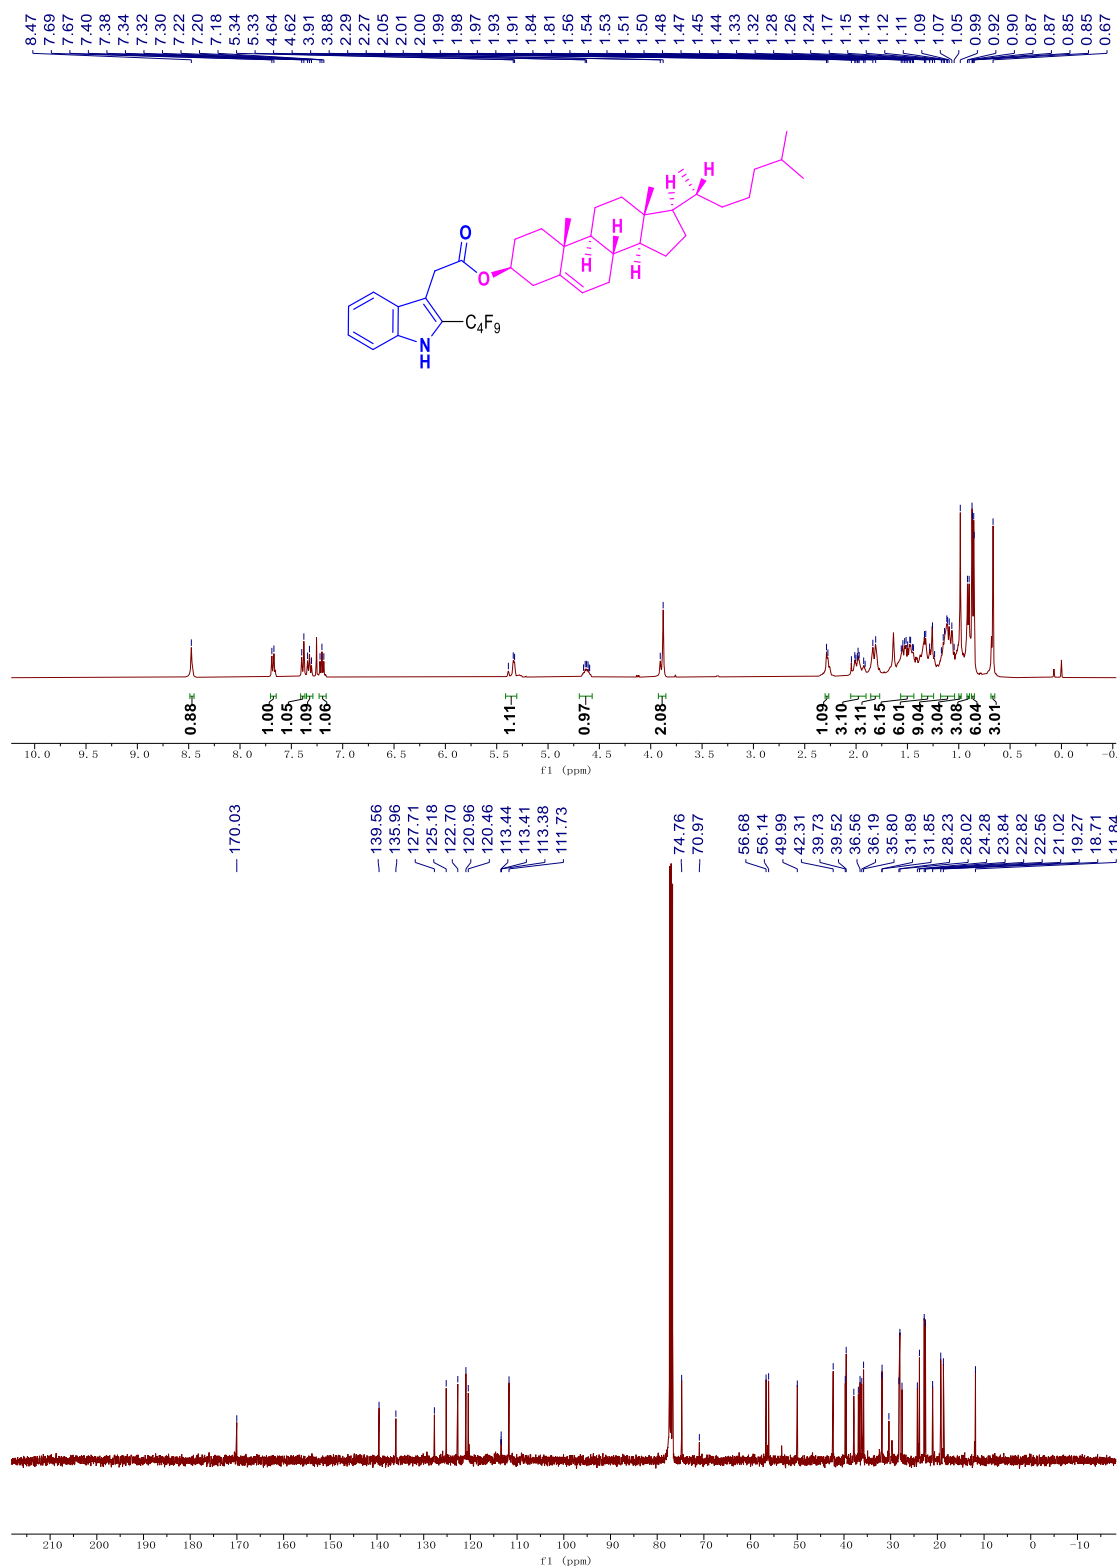



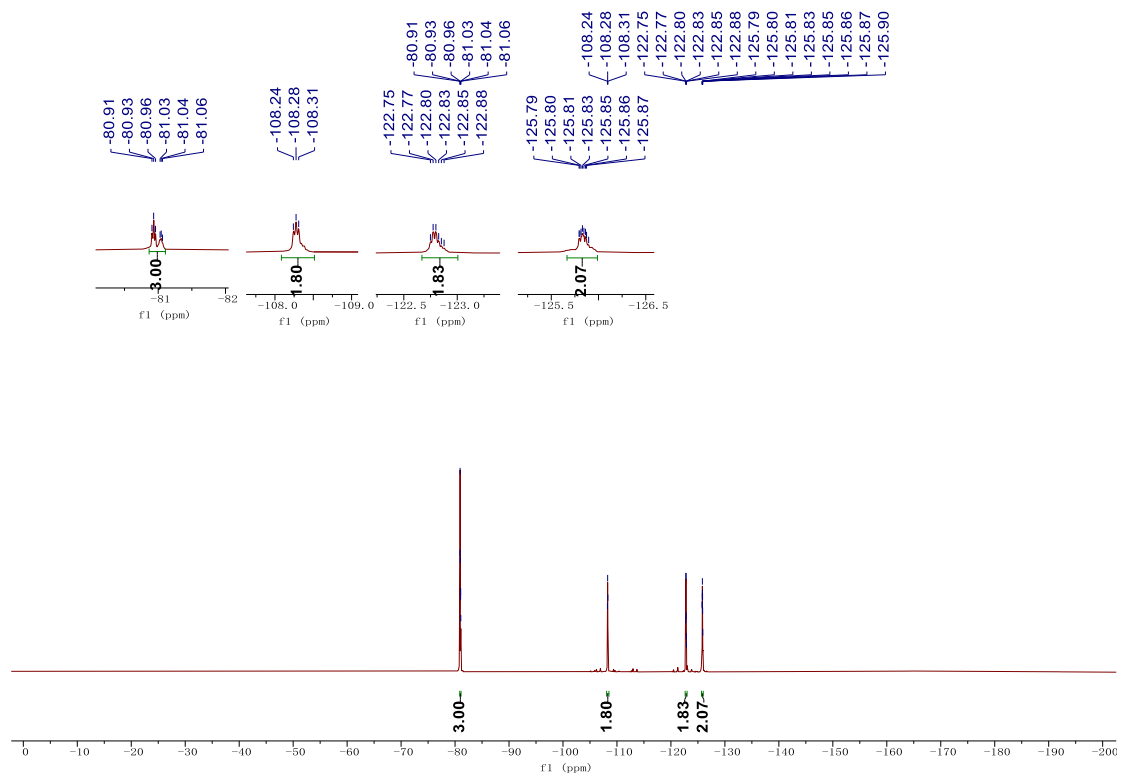

### 3-(perfluorobutyl)-1H-indole (7b)

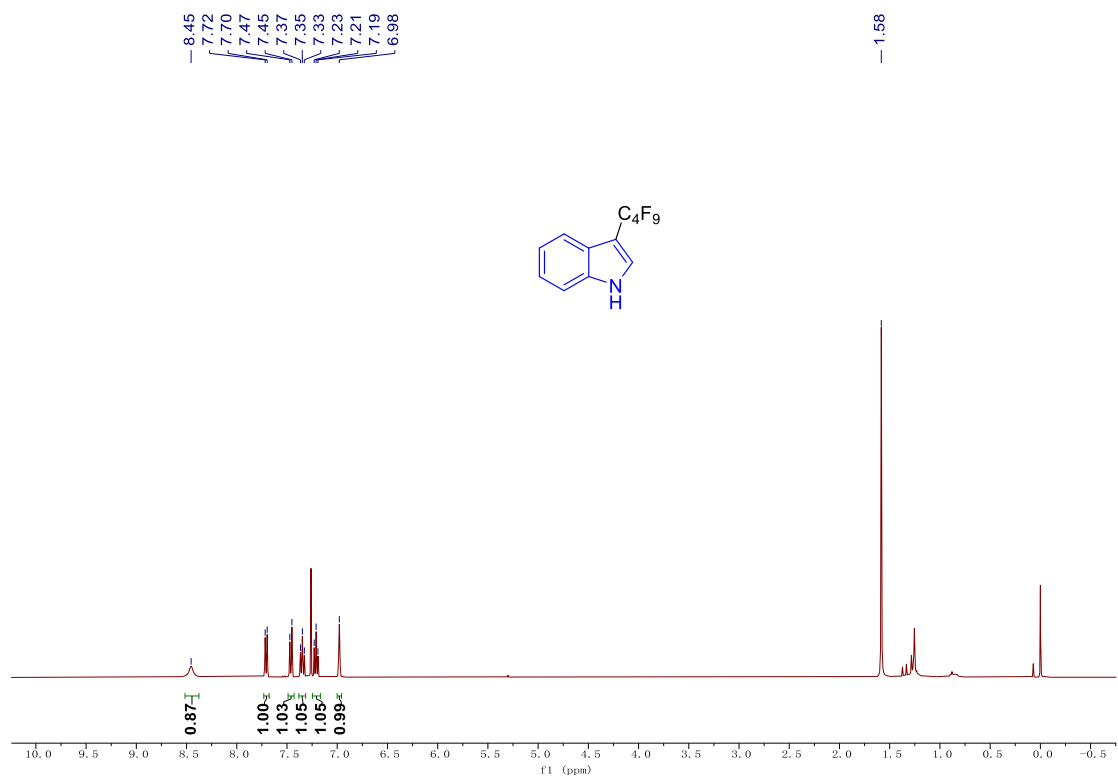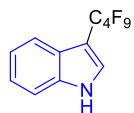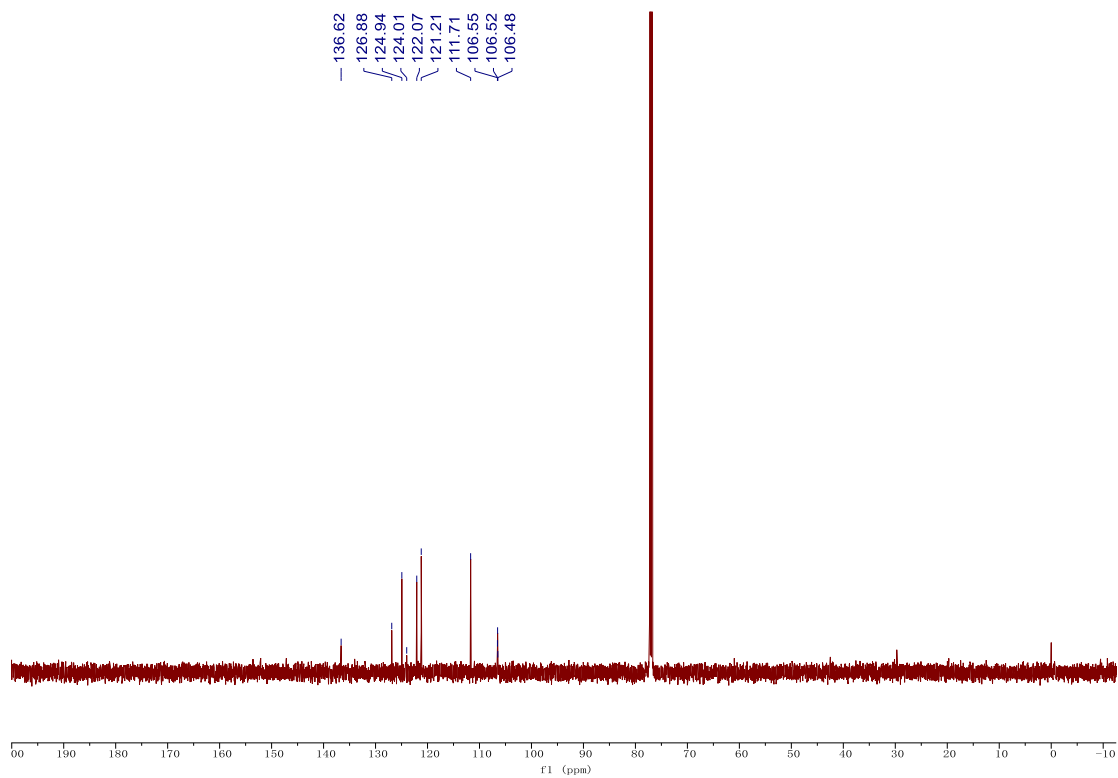

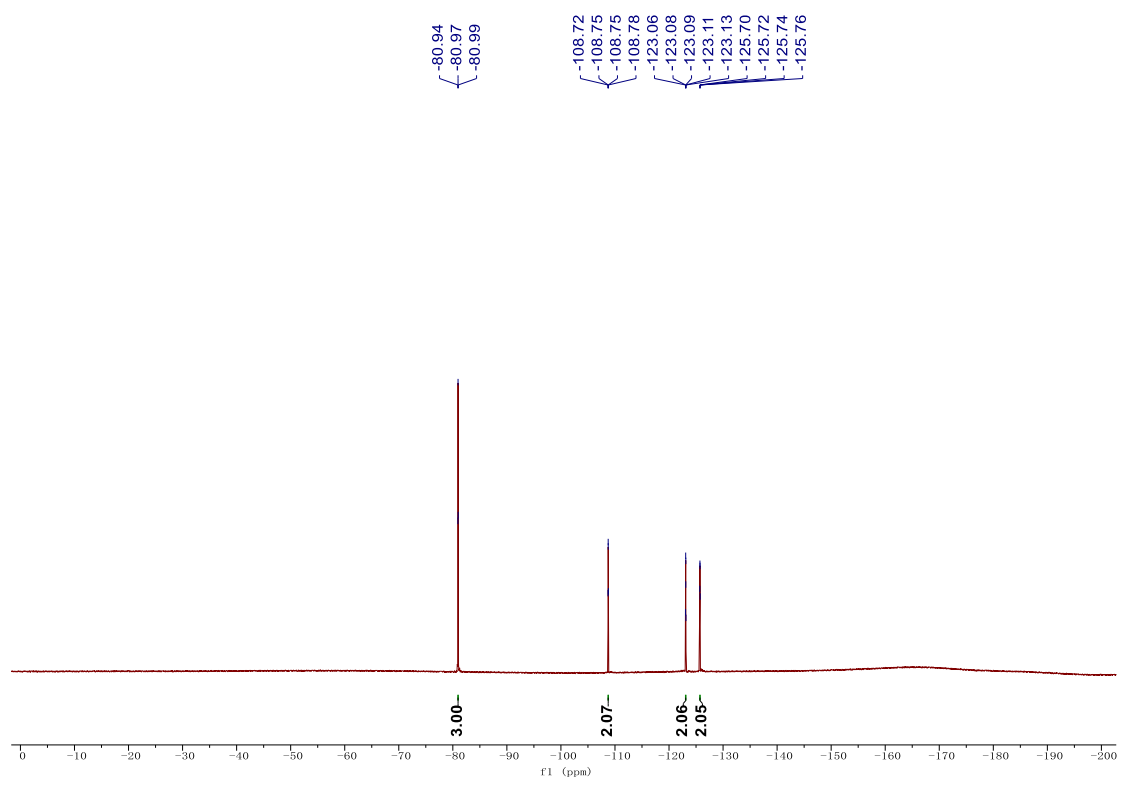

tert-butyl 3-(perfluorobutyl)-1H-indole-1-carboxylate (7c)

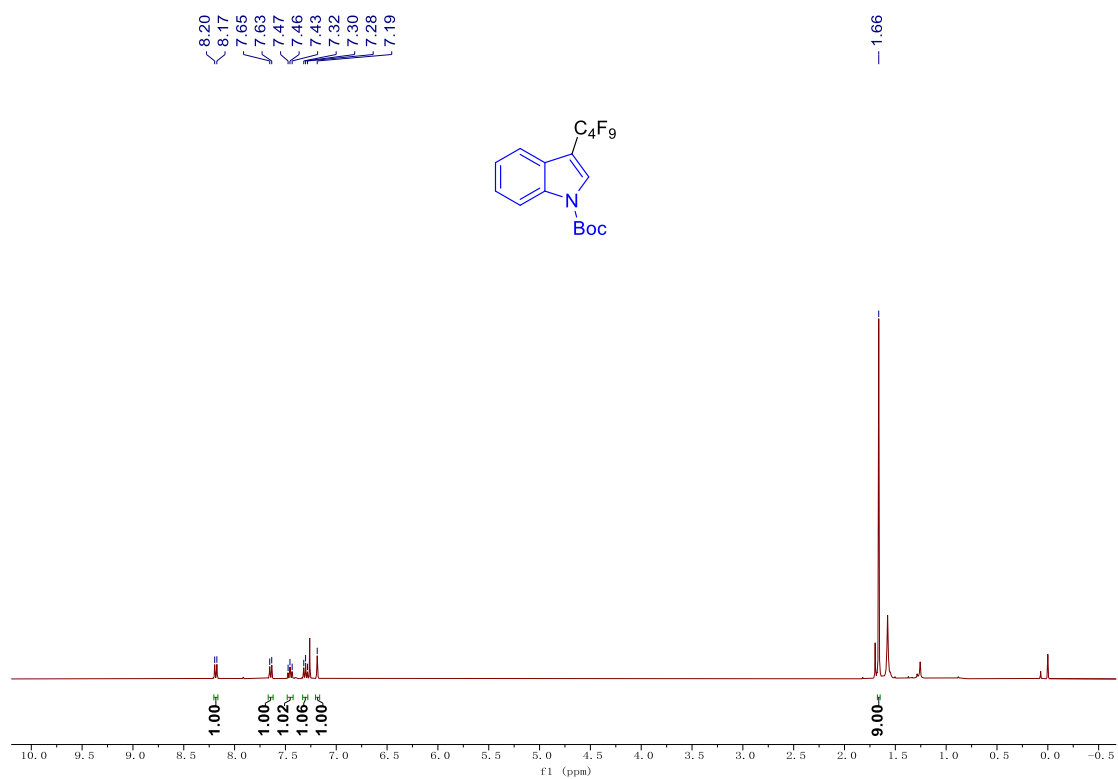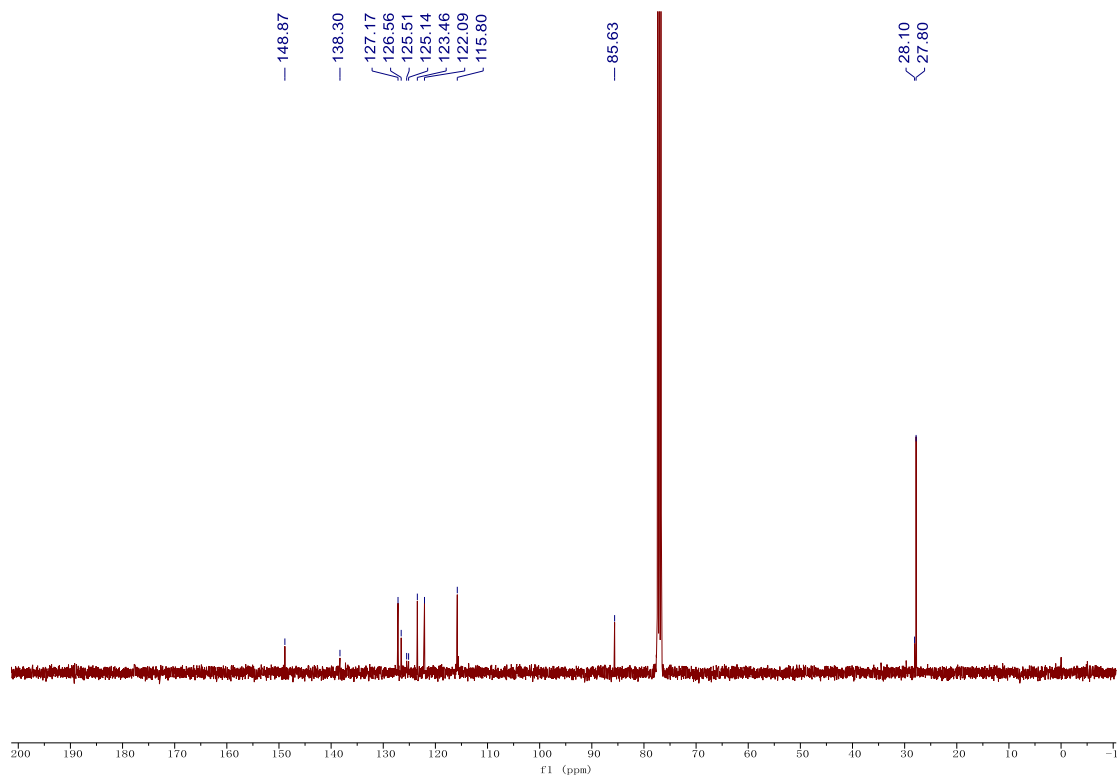

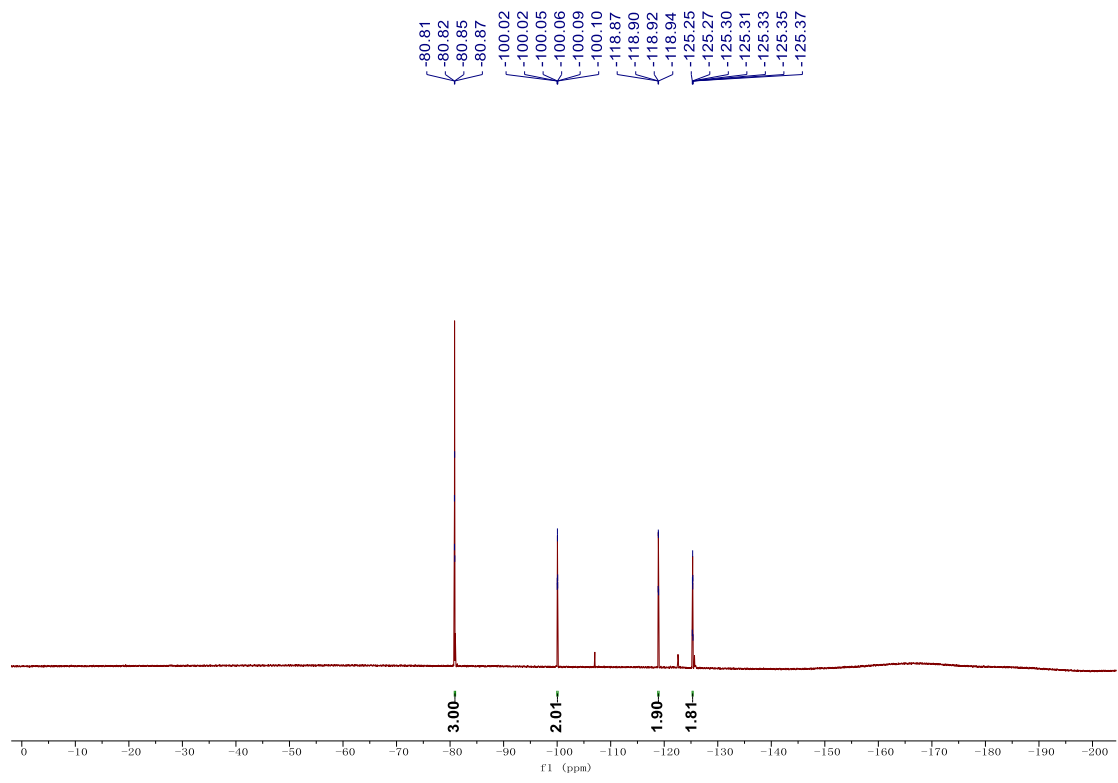

### 3-methyl-2-(perfluorobutyl)benzofuran (7d)

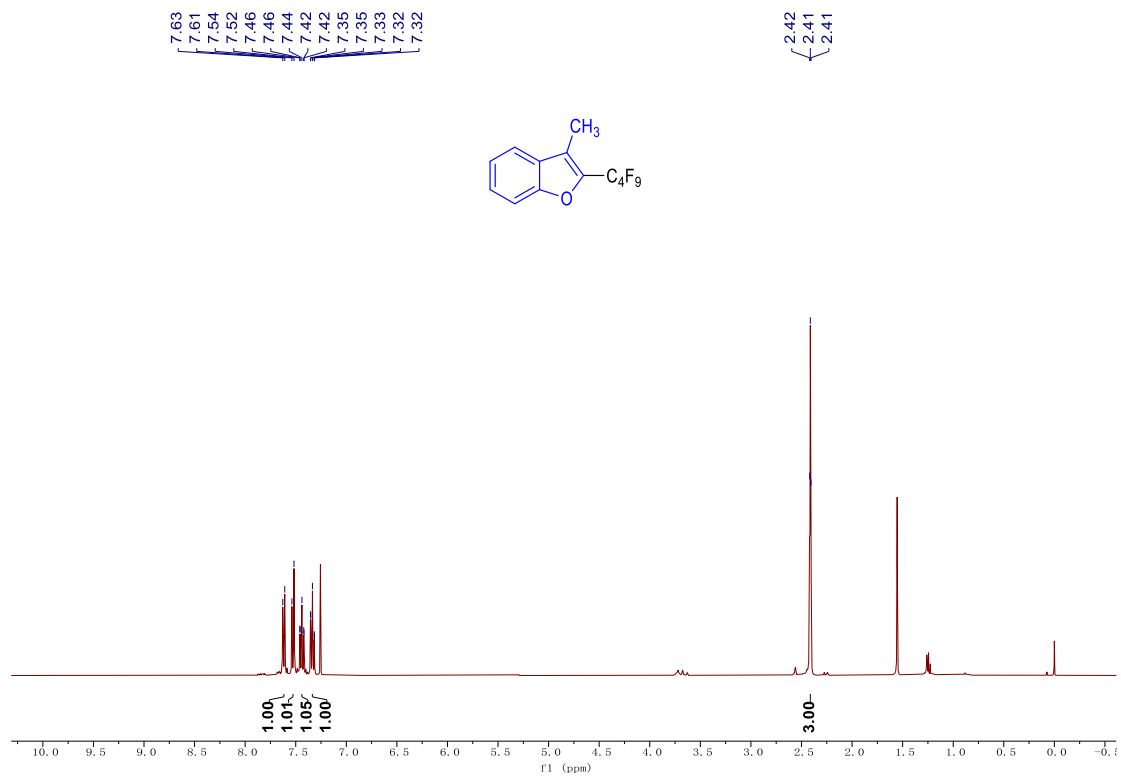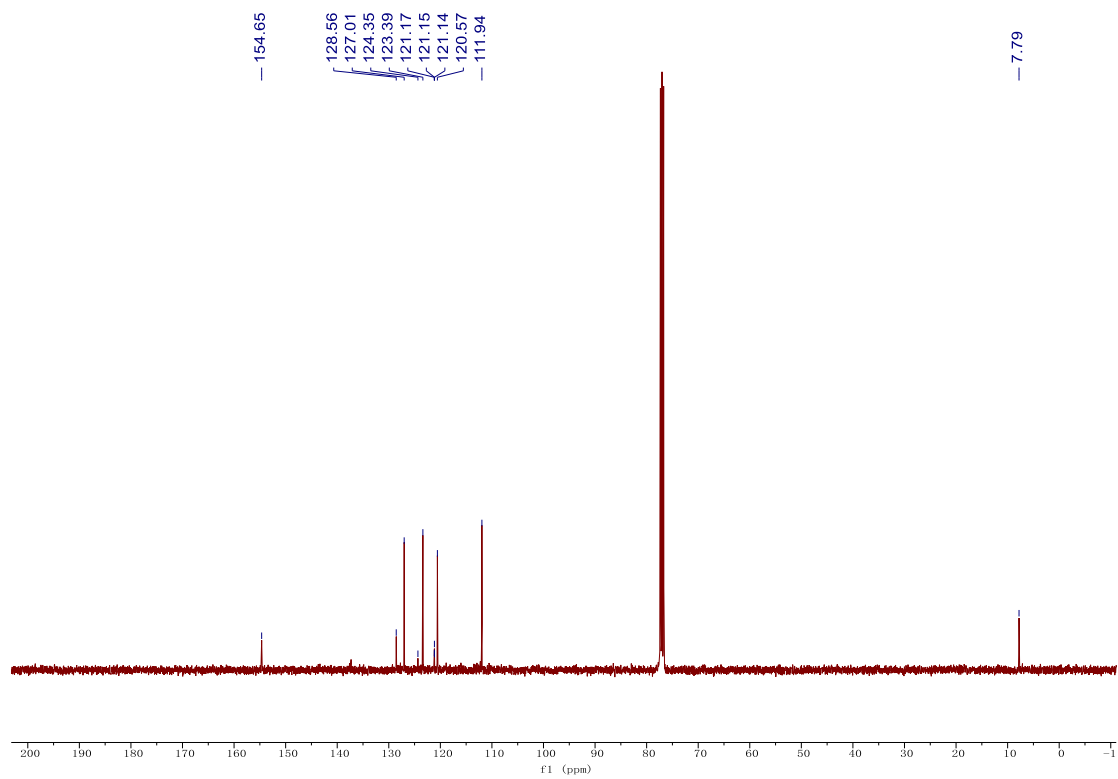

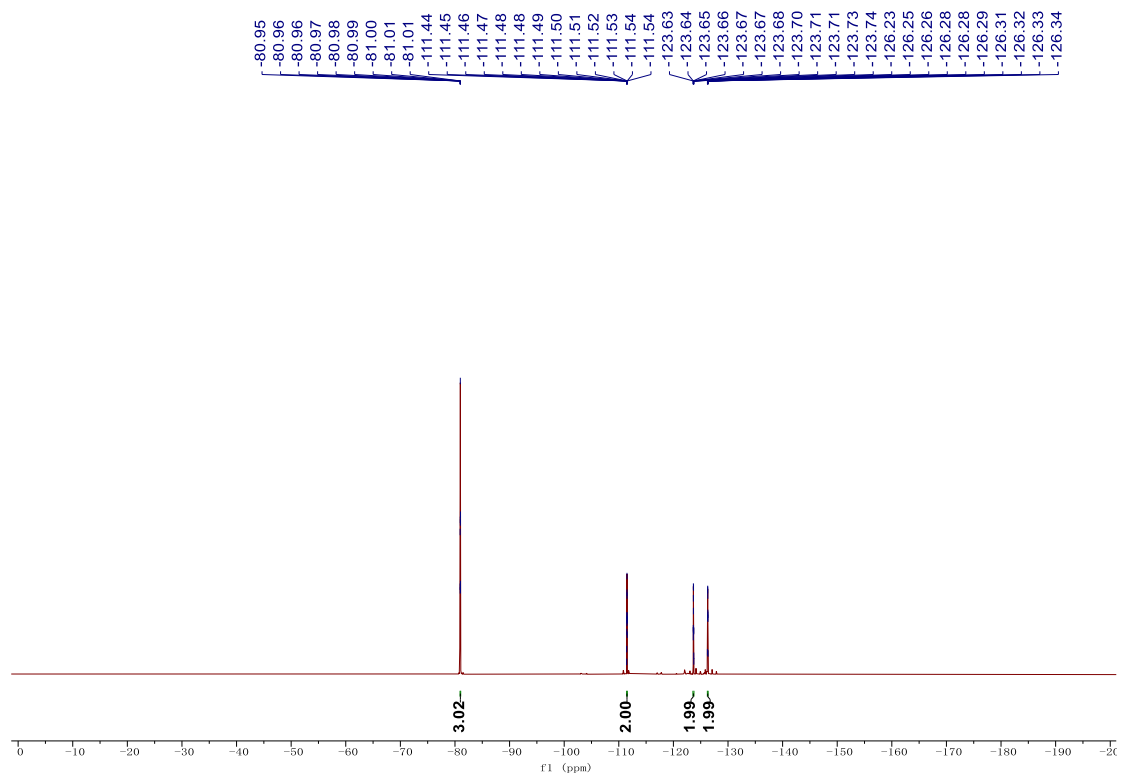

**5-bromo-3-methyl-2-(perfluorobutyl)benzofuran (7e)**

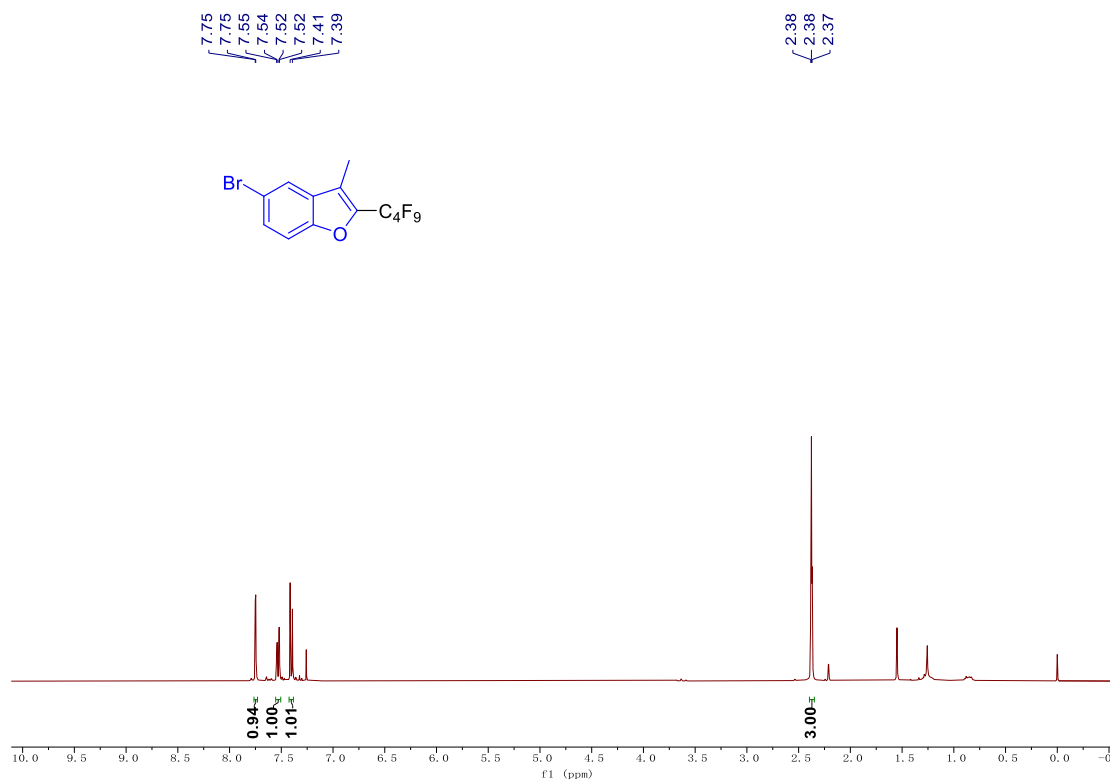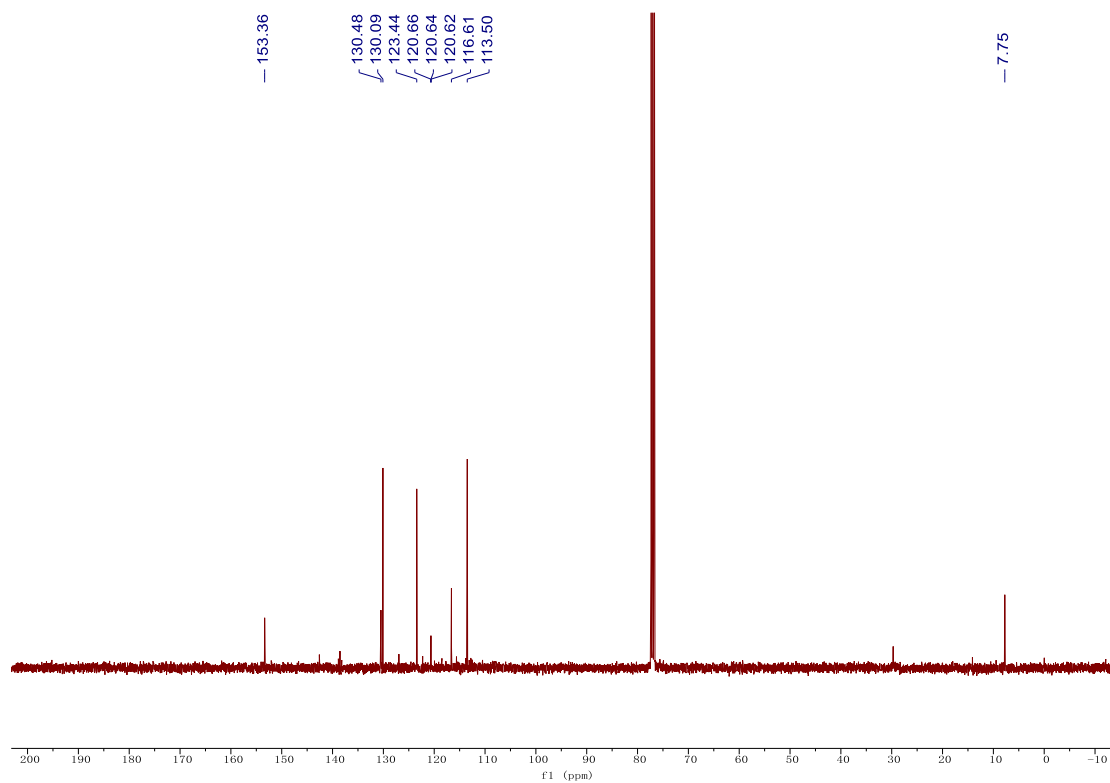



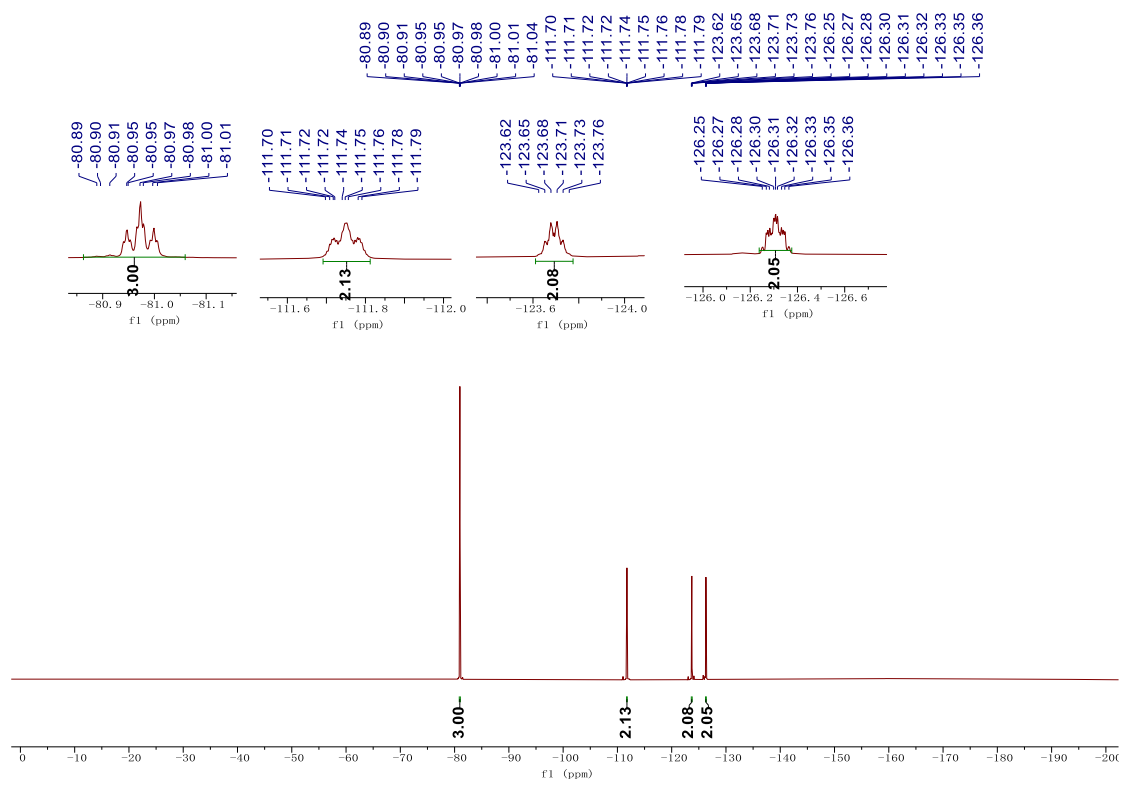

### 3-methyl-2-(perfluorobutyl)benzo[b]thiophene (7f)

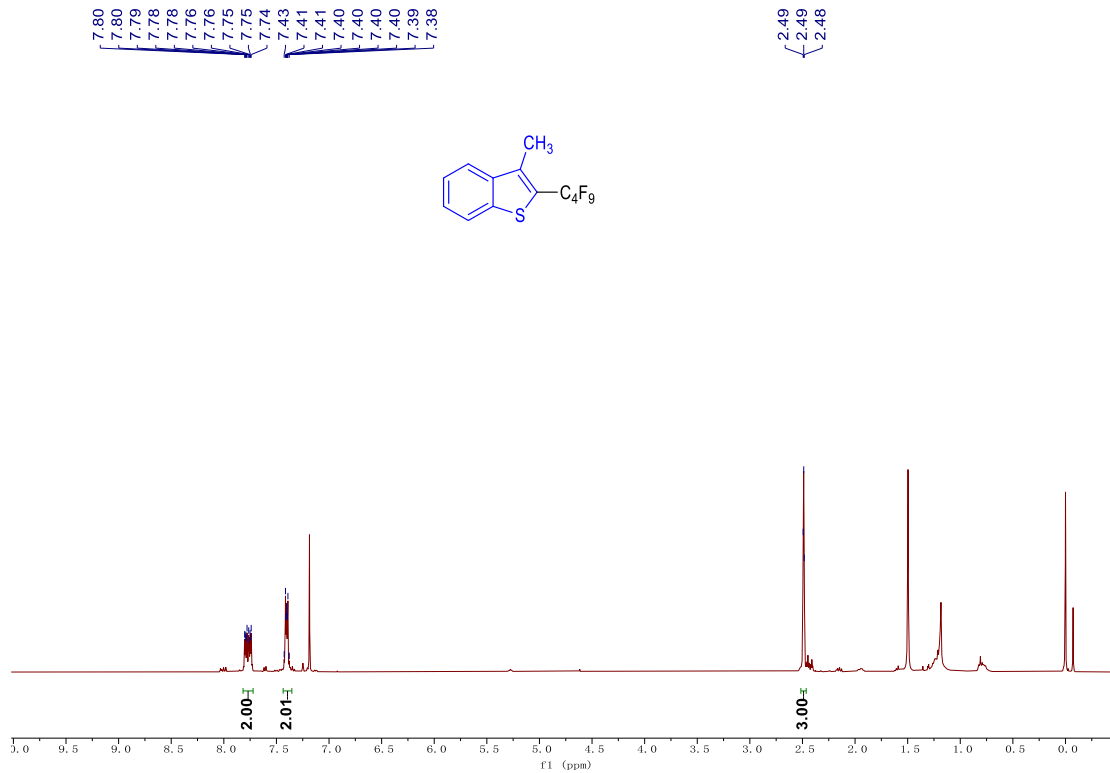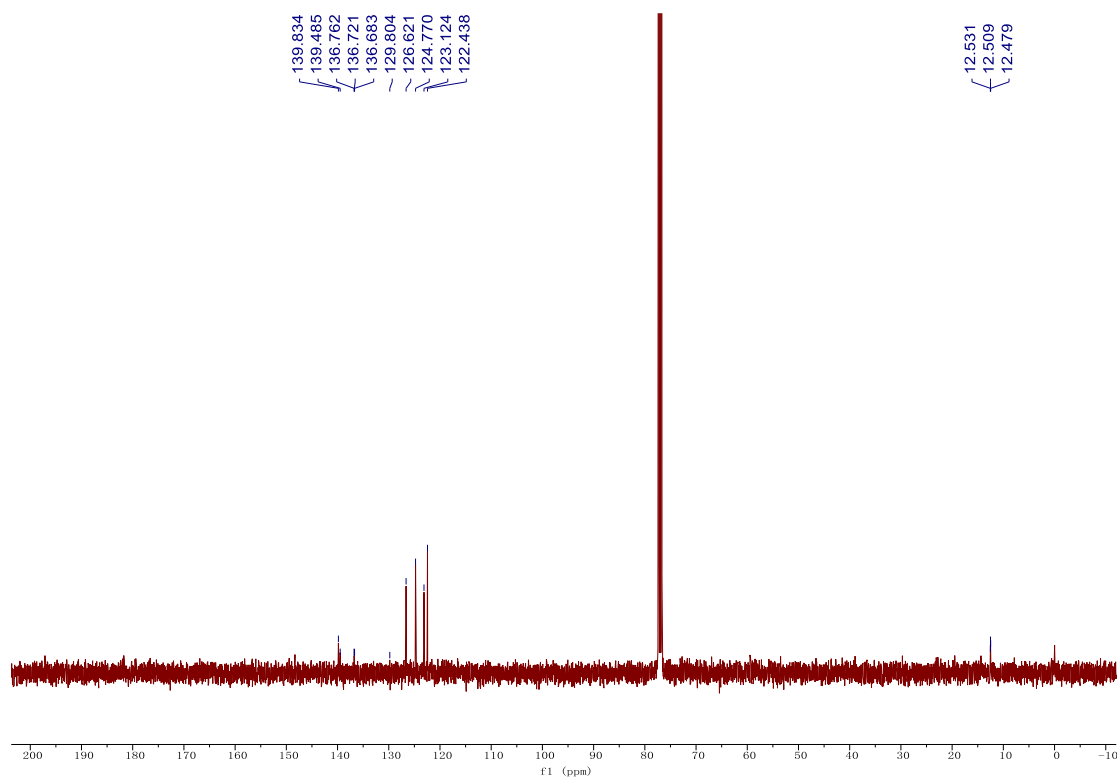

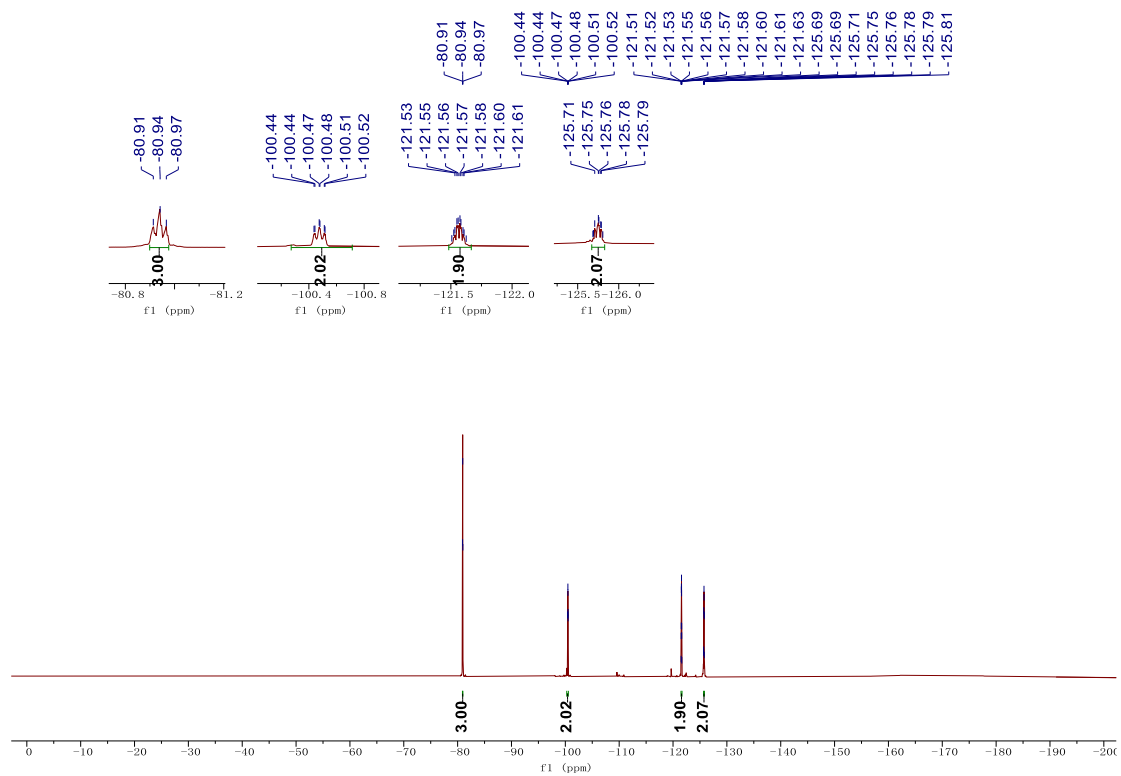

5-chloro-3-methyl-2-(perfluorobutyl)benzo**/b**/thiophene (7g)

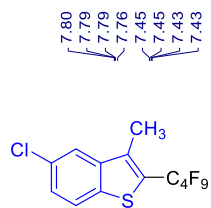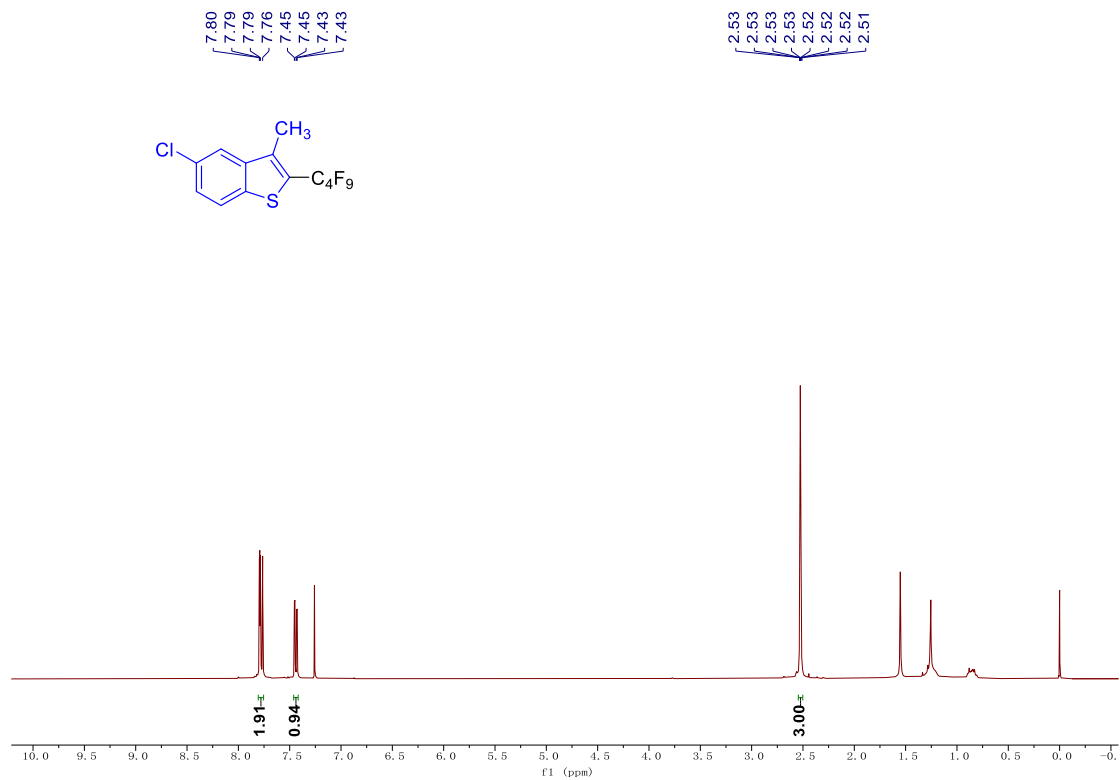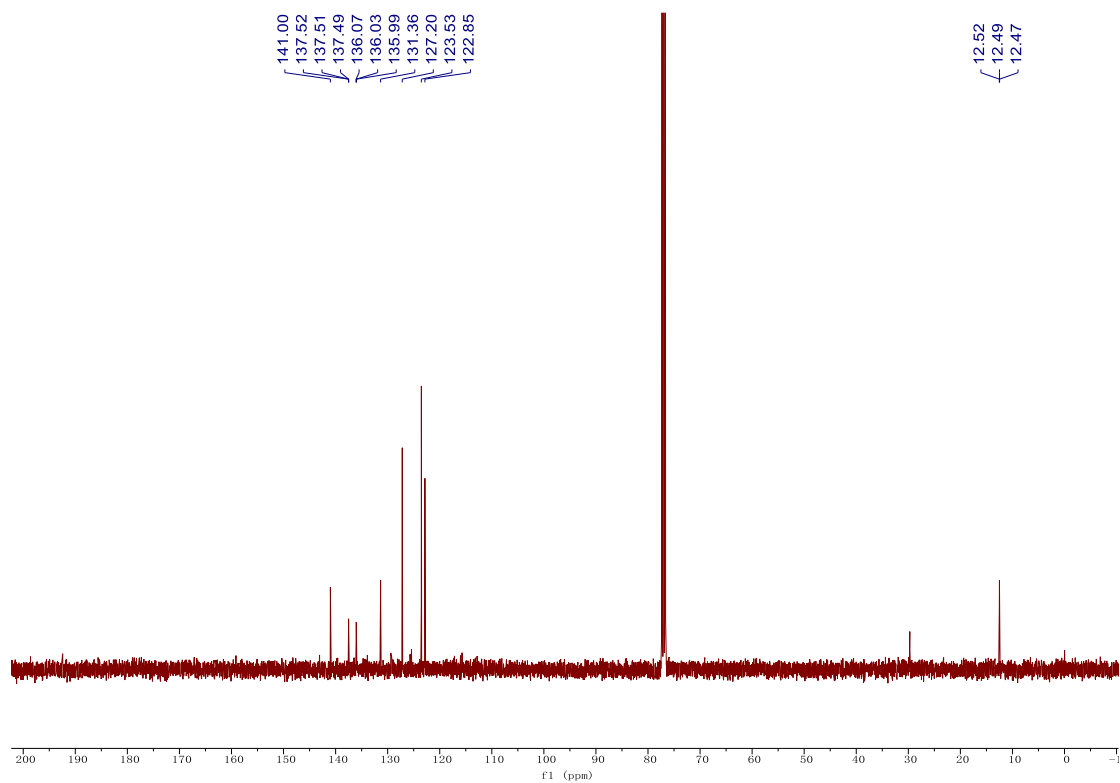

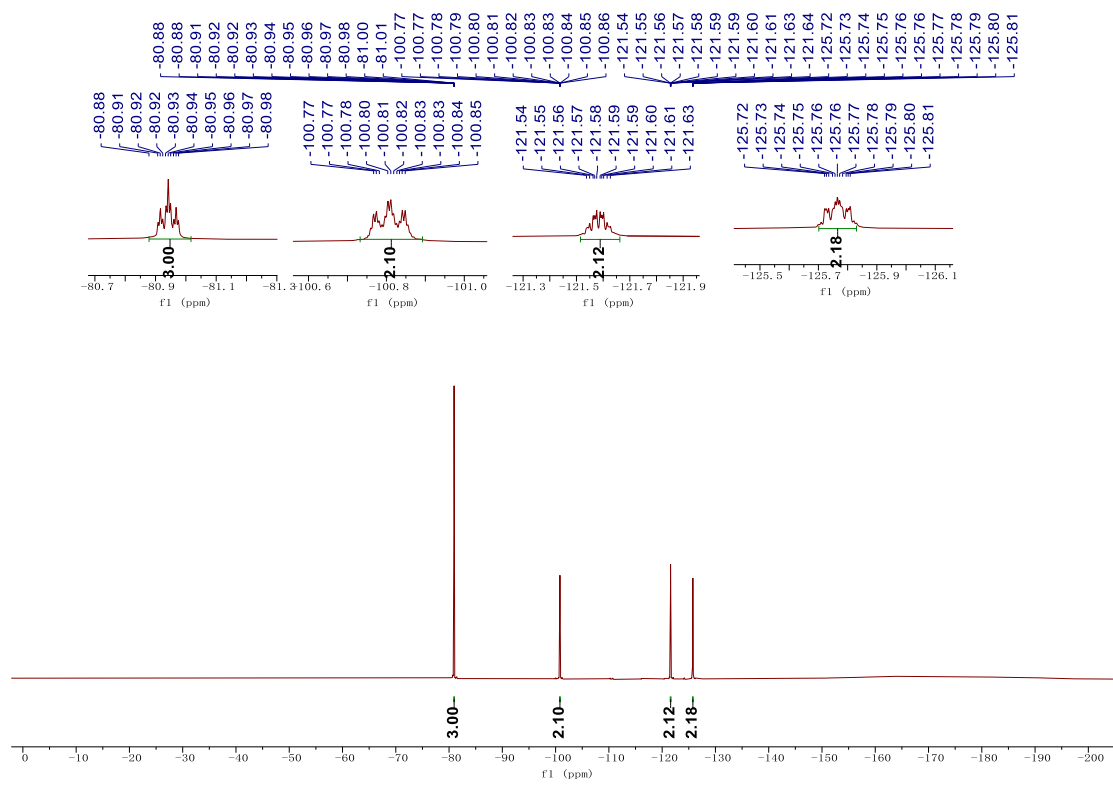

ethyl 3-(perfluorobutyl)-1H-pyrrole-2-carboxylate (7h)

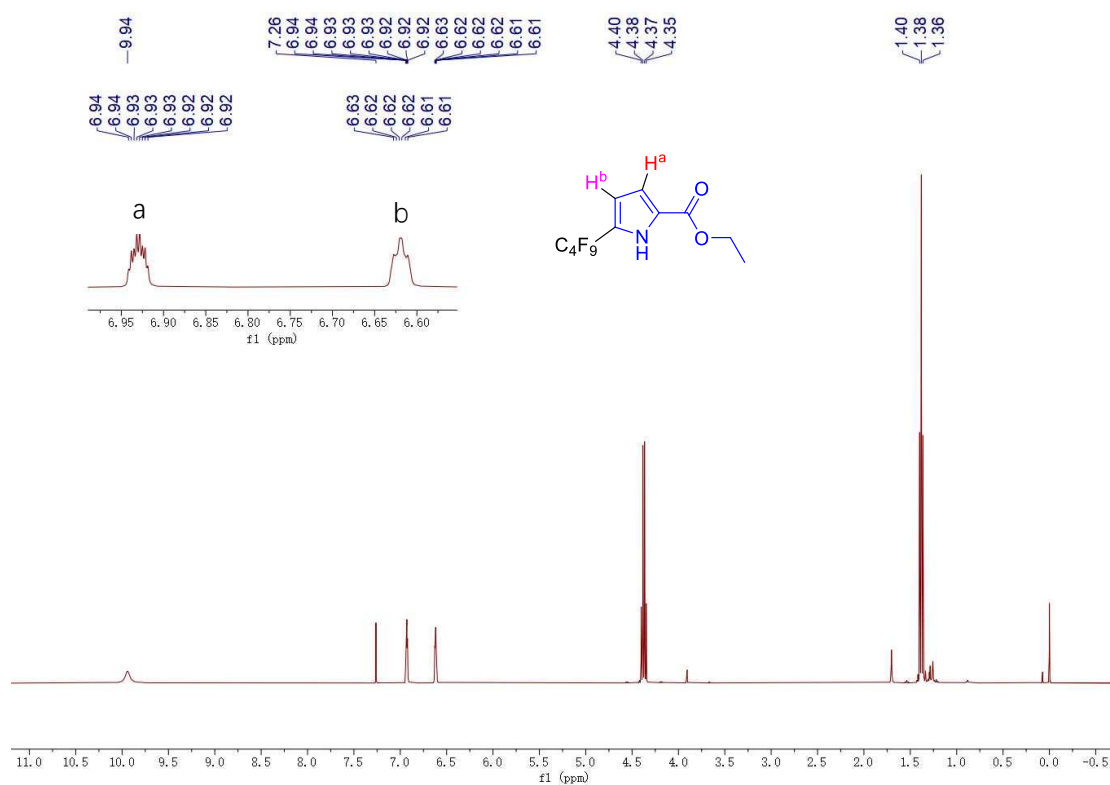

H-H COSY

C-H HSQC

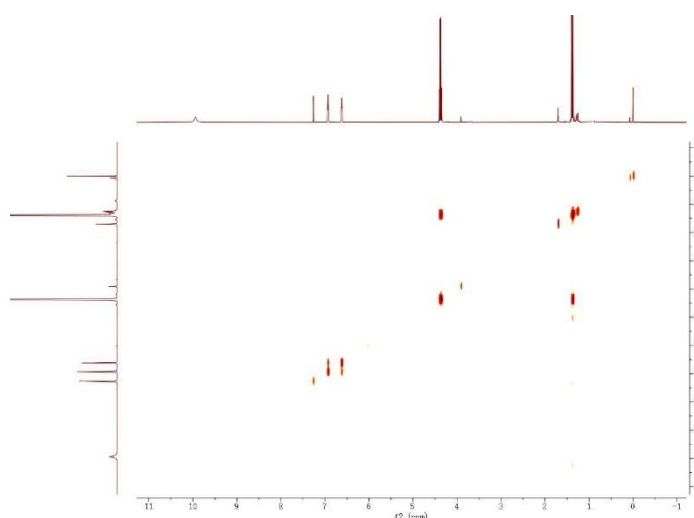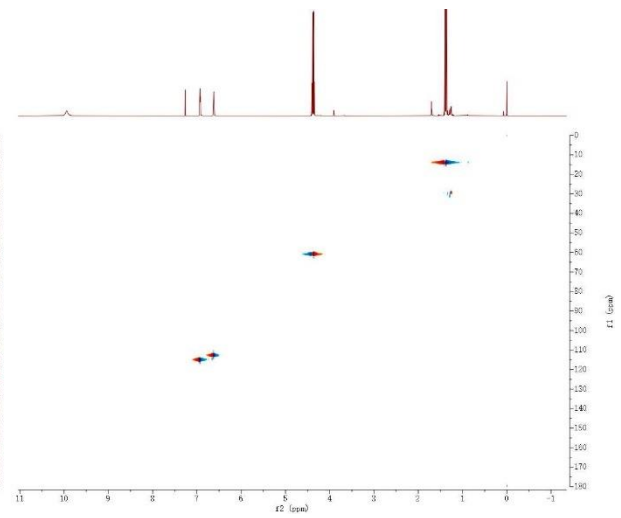

C-H HMBC

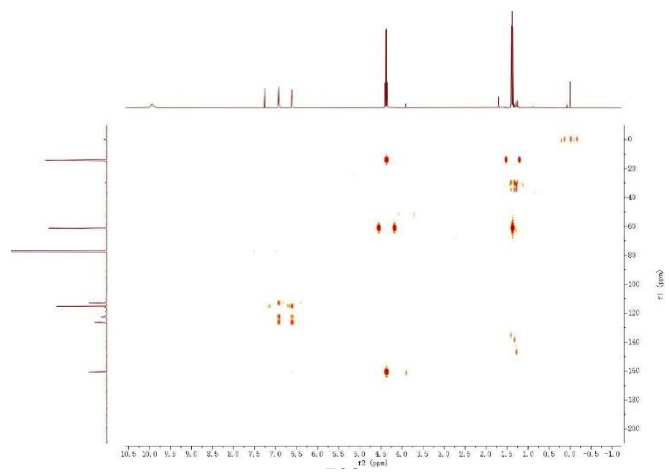

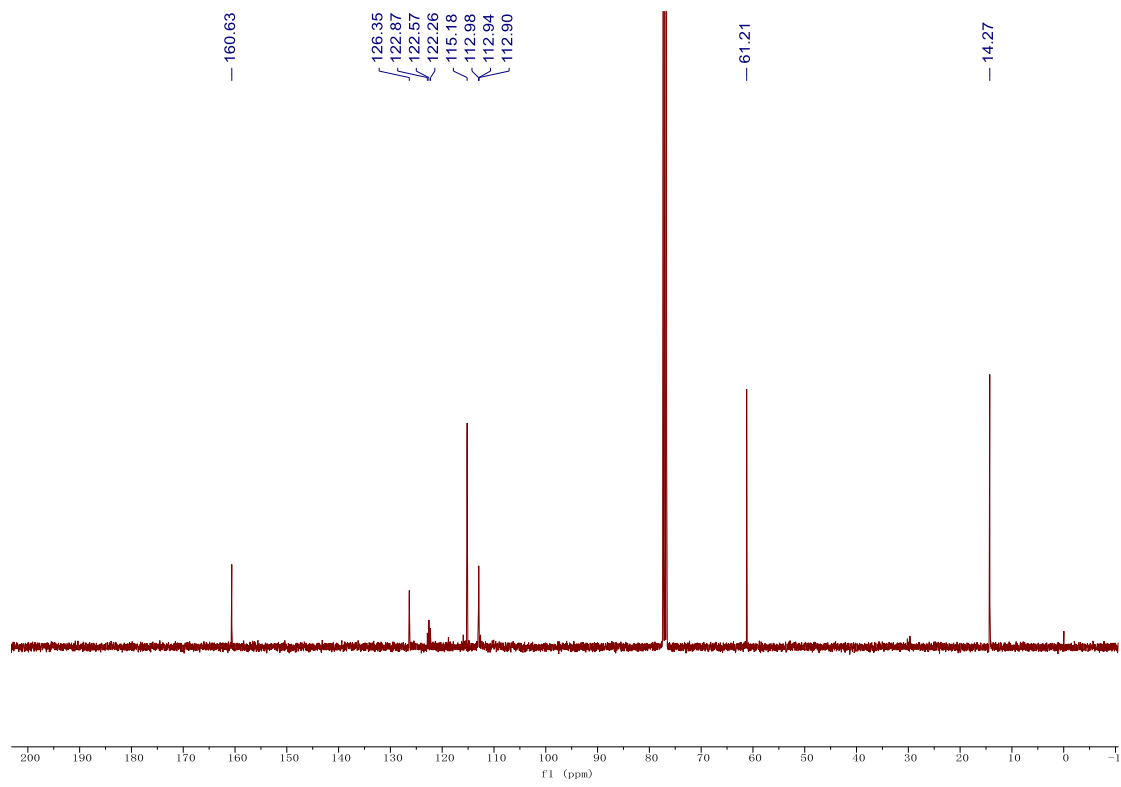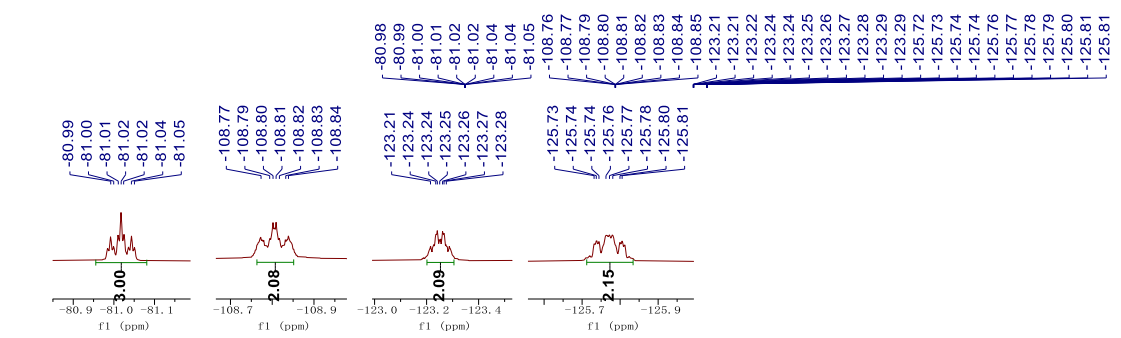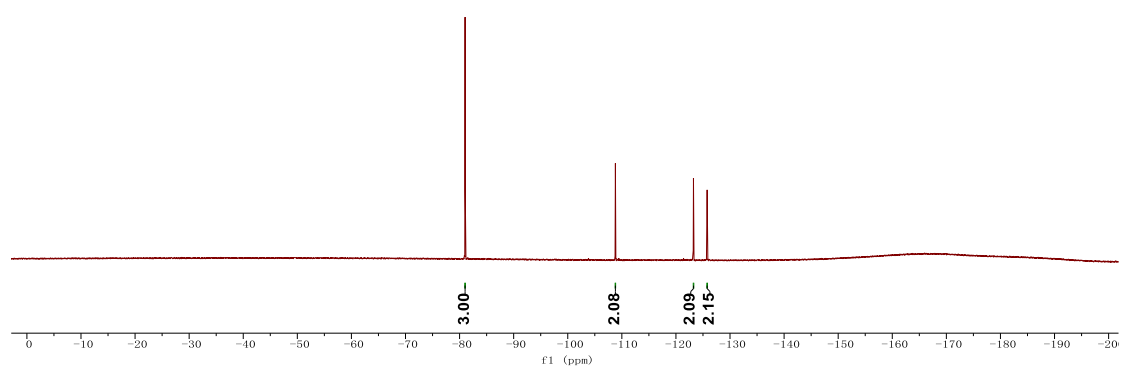

tert-butyl 2-(perfluorobutyl)-1H-pyrrole-1-carboxylate (7i)

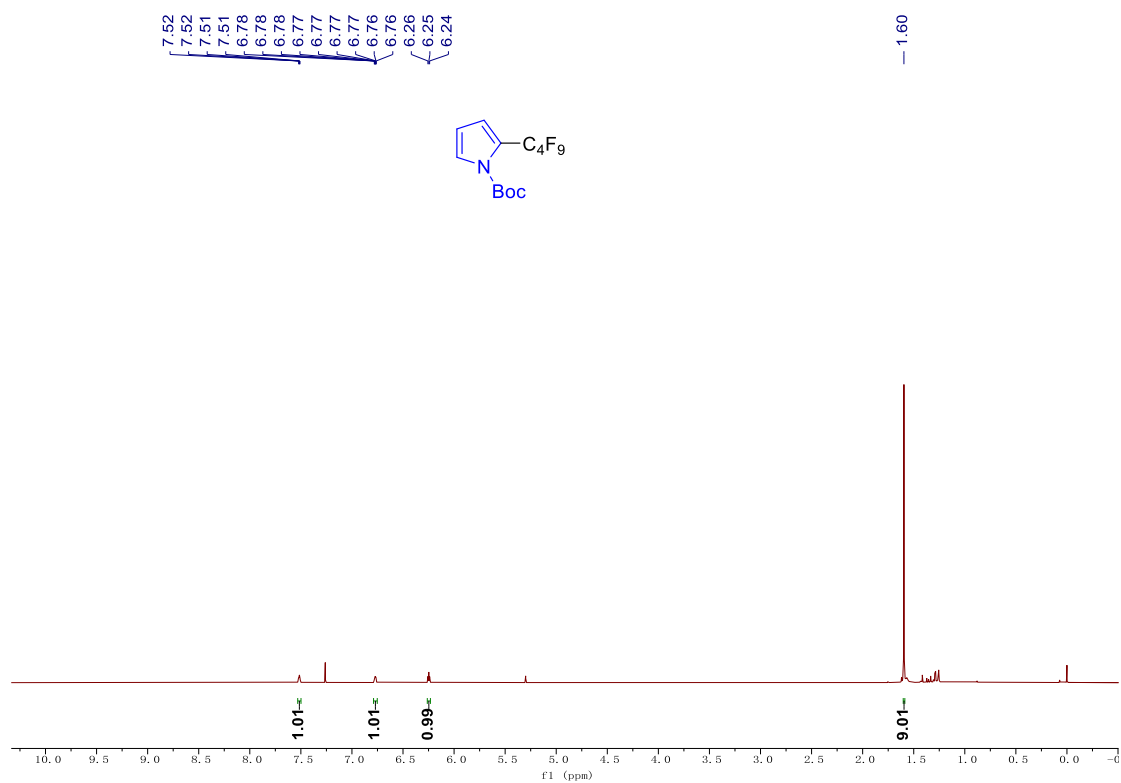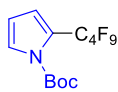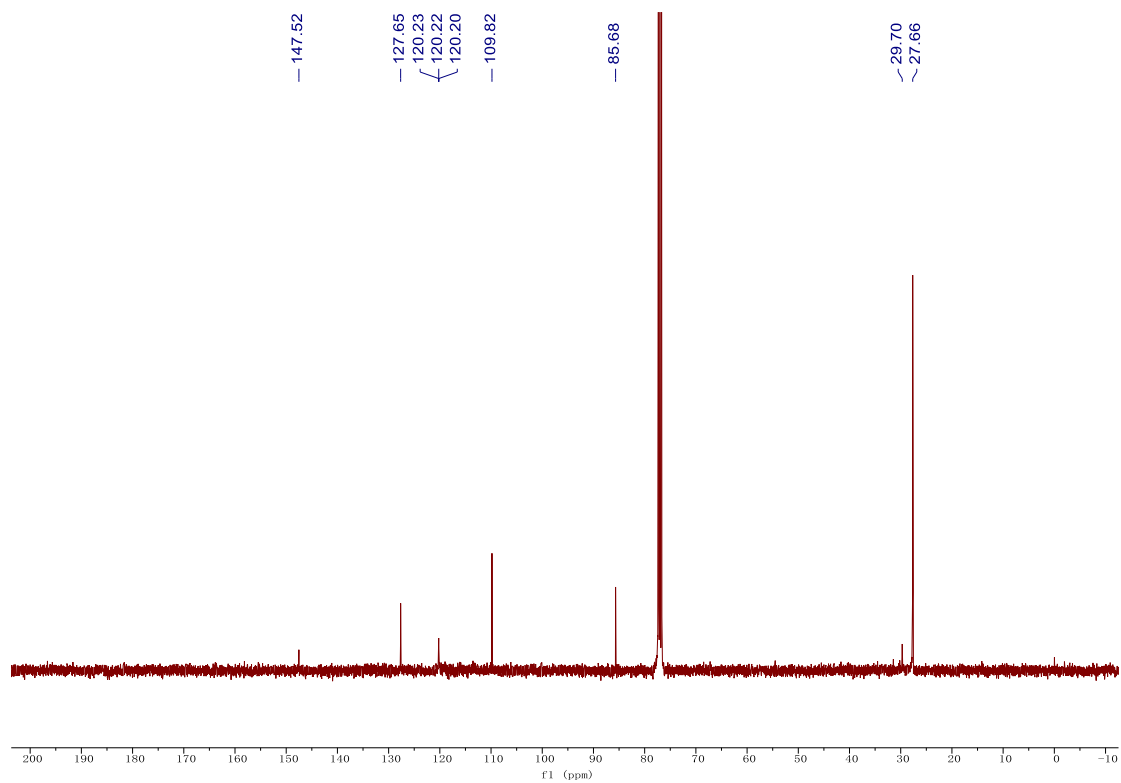



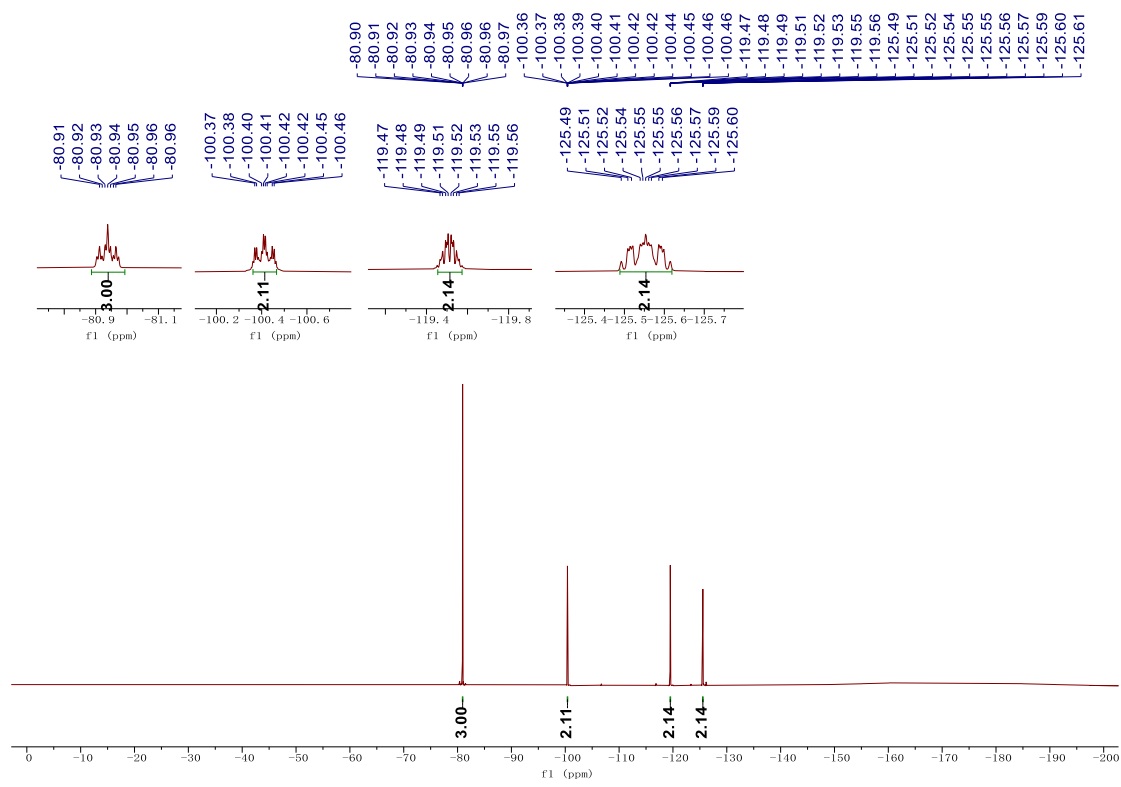

# 1-benzyl-2-(perfluorobutyl)-1H-pyrrole (7j)

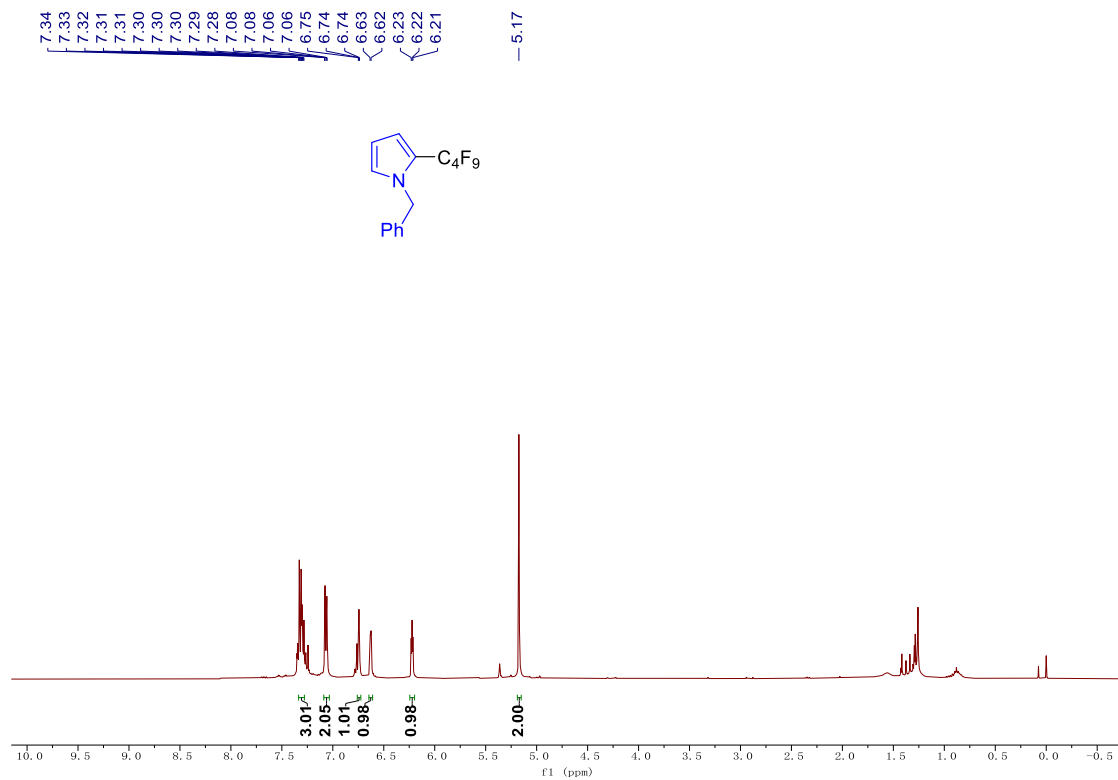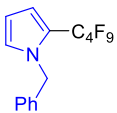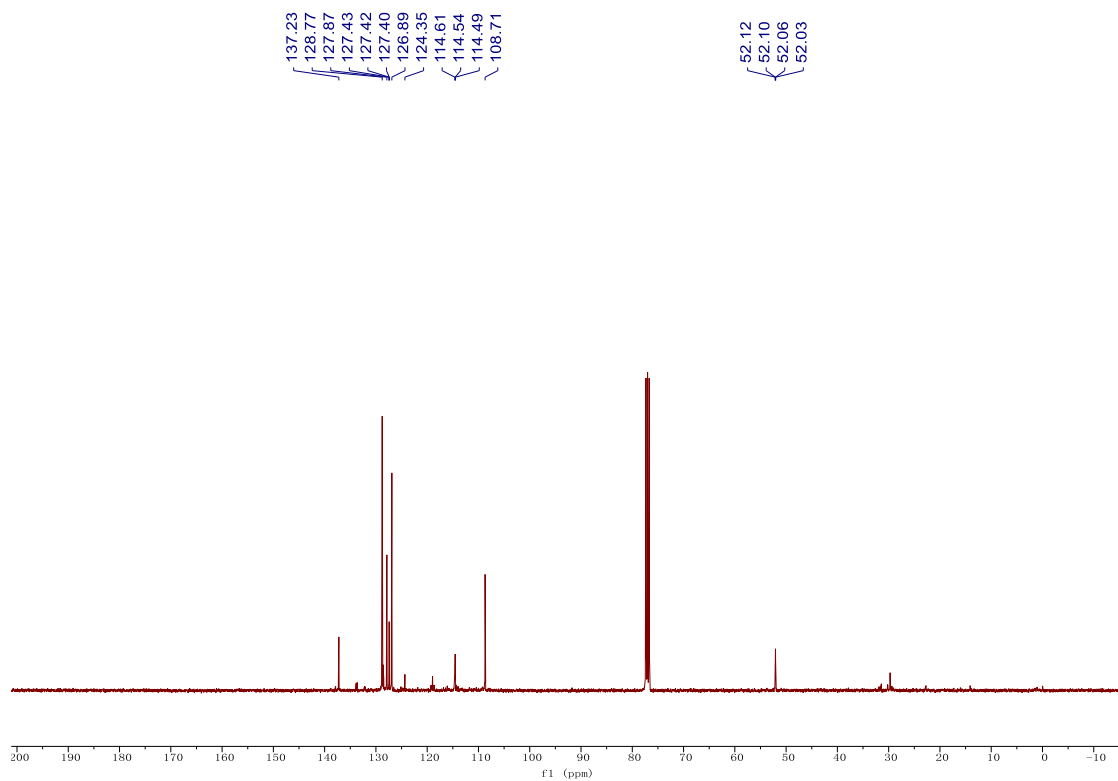

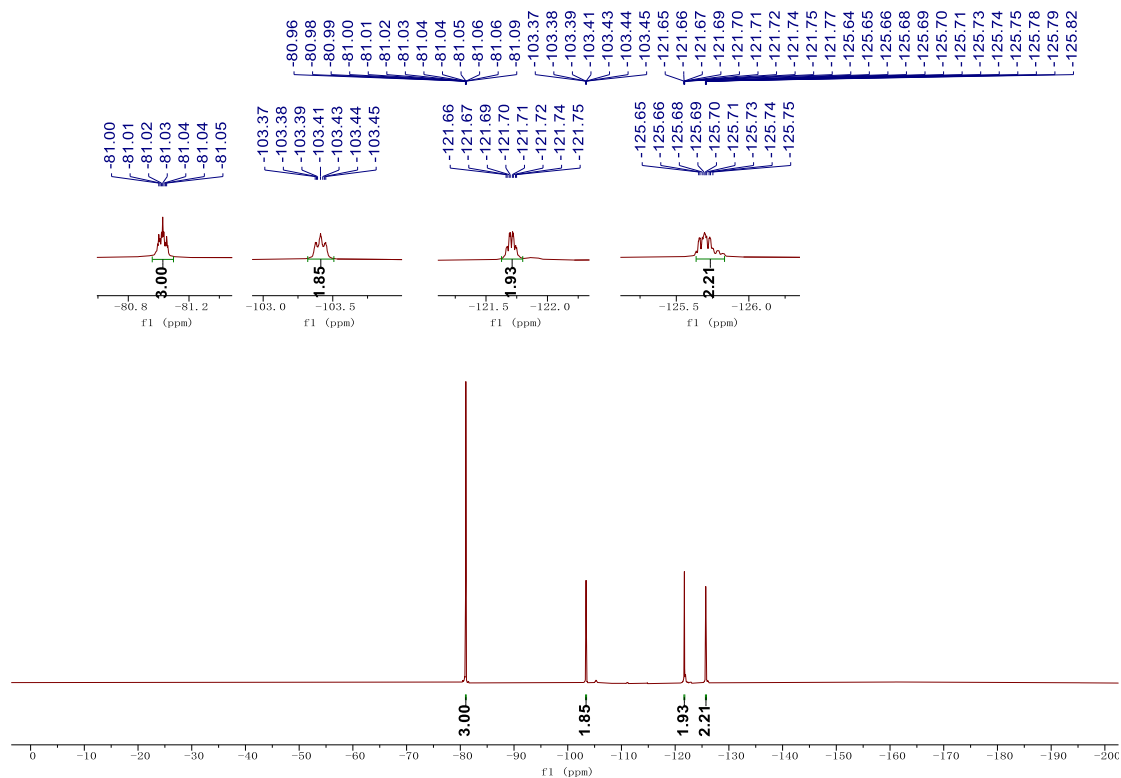

Supplement: d2qo01091g1.pdf [file d2qo01091g1.pdf]
